# Supplementary material for: Comparison of Blood RNA Extraction Methods Used for Gene Expression Profiling in Amyotrophic Lateral Sclerosis
Source: PLoS One. 2014 Jan 27;9(1):e87508. doi: 10.1371/journal.pone.0087508 (PMC3903649; doi:10.1371/journal.pone.0087508)
Supplement: Table S1 — Gene Ontology of genes unmasked by globin depletion (top 100 GO terms). (XLSX) [file pone.0087508.s001.xlsx]

## Sheet: S1 Genes unmasked by GC
Term	Count	%	PValue	Genes	List Total	Pop Hits	Pop Total	Fold Enrichment	Bonferroni	Benjamini	FDR
GO:0031974~membrane-enclosed lumen	649	14.3648	3.78817e-51	214305_S_AT, 212385_AT, 240154_AT, 231921_AT, 207727_S_AT, 201485_S_AT, 239042_AT, 219217_AT, 221287_AT, 209667_AT, 222734_AT, 213427_AT, 214045_AT, 228190_AT, 213007_AT, 203155_AT, 222867_S_AT, 221437_S_AT, 219862_S_AT, 235841_AT, 222590_S_AT, 224330_S_AT, 202942_AT, 218218_AT, 205383_S_AT, 233027_AT, 201748_S_AT, 226605_AT, 1559942_AT, 225452_AT, 226082_S_AT, 233899_X_AT, 226262_AT, 231815_AT, …	2699	1856	12782	1.65601	2.85249e-48	2.85249e-48	5.76858e-48
GO:0070013~intracellular organelle lumen	627	13.8778	1.59713e-50	214305_S_AT, 212385_AT, 240154_AT, 231921_AT, 207727_S_AT, 201485_S_AT, 239042_AT, 219217_AT, 221287_AT, 209667_AT, 222734_AT, 213427_AT, 214045_AT, 228190_AT, 213007_AT, 203155_AT, 222867_S_AT, 221437_S_AT, 219862_S_AT, 235841_AT, 222590_S_AT, 224330_S_AT, 202942_AT, 218218_AT, 205383_S_AT, 233027_AT, 226605_AT, 201748_S_AT, 1559942_AT, 225452_AT, 233899_X_AT, 226082_S_AT, 231815_AT, 226952_AT, …	2699	1779	12782	1.66912	1.20264e-47	6.01319e-48	2.43209e-47
GO:0043233~organelle lumen	636	14.077	7.38548e-50	214305_S_AT, 212385_AT, 240154_AT, 231921_AT, 207727_S_AT, 201485_S_AT, 239042_AT, 219217_AT, 221287_AT, 209667_AT, 222734_AT, 213427_AT, 214045_AT, 228190_AT, 213007_AT, 203155_AT, 222867_S_AT, 221437_S_AT, 219862_S_AT, 235841_AT, 222590_S_AT, 224330_S_AT, 202942_AT, 218218_AT, 205383_S_AT, 233027_AT, 226605_AT, 201748_S_AT, 1559942_AT, 225452_AT, 233899_X_AT, 226082_S_AT, 231815_AT, 226952_AT, …	2699	1820	12782	1.65494	5.56127e-47	1.85376e-47	1.12465e-46
GO:0031981~nuclear lumen	513	11.3546	6.87922e-41	214305_S_AT, 212385_AT, 240154_AT, 231921_AT, 212996_S_AT, 207727_S_AT, 239042_AT, 212384_AT, 221287_AT, 232483_AT, 201479_AT, 225521_AT, 223802_S_AT, 214045_AT, 213427_AT, 225278_AT, 237456_AT, 228190_AT, 213007_AT, 204531_S_AT, 203155_AT, 1557504_AT, 222867_S_AT, 212030_AT, 218886_AT, 219862_S_AT, 209902_AT, 222590_S_AT, 235841_AT, 203856_AT, 220370_S_AT, 231718_AT, 217550_AT, 233027_AT, 205383…	2699	1450	12782	1.6755	5.18006e-38	1.29501e-38	1.04756e-37
GO:0005654~nucleoplasm	331	7.32625	4.37591e-31	214305_S_AT, 212385_AT, 207727_S_AT, 212384_AT, 232483_AT, 201479_AT, 225521_AT, 225278_AT, 237456_AT, 213007_AT, 204531_S_AT, 1557504_AT, 222867_S_AT, 212030_AT, 209902_AT, 235841_AT, 231718_AT, 217550_AT, 233027_AT, 218218_AT, 226605_AT, 225452_AT, 226952_AT, 231815_AT, 202809_S_AT, 203686_AT, 232035_AT, 235096_AT, 201182_S_AT, 211874_S_AT, 210093_S_AT, 216902_S_AT, 206593_S_AT, 212533_AT, 2031…	2699	882	12782	1.77728	3.29506e-28	6.59012e-29	6.6636e-28
GO:0044451~nucleoplasm part	215	4.75874	3.72847e-22	214305_S_AT, 203599_S_AT, 212385_AT, 212332_AT, 212384_AT, 232483_AT, 242230_AT, 201085_S_AT, 201479_AT, 226862_AT, 225694_AT, 225691_AT, 1555501_S_AT, 209382_AT, 225902_AT, 1557504_AT, 225348_AT, 222867_S_AT, 209824_S_AT, 212030_AT, 235841_AT, 232333_AT, 216212_S_AT, 231718_AT, 218218_AT, 226605_AT, 225452_AT, 203654_S_AT, 231815_AT, 226952_AT, 209204_AT, 202809_S_AT, 235283_AT, 209128_S_AT, 227…	2699	555	12782	1.8346	2.80754e-19	4.67923e-20	5.67768e-19
GO:0005739~mitochondrion	355	7.85746	9.54148e-21	210820_X_AT, 202503_S_AT, 221287_AT, 219217_AT, 222734_AT, 205986_AT, 214045_AT, 201135_AT, 204385_AT, 218981_AT, 202080_S_AT, 208848_AT, 203646_AT, 221437_S_AT, 224330_S_AT, 201509_AT, 218316_AT, 209275_S_AT, 231919_AT, 202942_AT, 213257_AT, 217491_X_AT, 200708_AT, 1555905_A_AT, 1552625_A_AT, 223091_X_AT, 244052_AT, 229696_AT, 223192_AT, 233630_AT, 1559128_AT, 218188_S_AT, 209623_AT, 223356_S_AT…	2699	1087	12782	1.54666	7.18474e-18	1.02639e-18	1.45297e-17
GO:0006350~transcription	653	14.4533	1.1074e-20	212385_AT, 214108_AT, 235690_AT, 244458_AT, 237118_AT, 203155_AT, 222867_S_AT, 228917_AT, 229885_AT, 235841_AT, 208445_S_AT, 222590_S_AT, 205383_S_AT, 214009_AT, 201748_S_AT, 1559942_AT, 225452_AT, 233899_X_AT, 231815_AT, 226952_AT, 231188_AT, 202616_S_AT, 206194_AT, 223393_S_AT, 1555920_AT, 41113_AT, 205089_AT, 201182_S_AT, 216902_S_AT, 206593_S_AT, 225048_AT, 243037_AT, 238148_S_AT, 222616_S_AT…	3121	2101	13528	1.34718	5.27675e-17	5.27675e-17	2.09676e-17
GO:0043232~intracellular non-membrane-bounded organelle	708	15.6707	1.20132e-17	240154_AT, 231921_AT, 239042_AT, 213427_AT, 214045_AT, 228190_AT, 203714_S_AT, 213007_AT, 203155_AT, 228323_AT, 221437_S_AT, 219862_S_AT, 208445_S_AT, 222590_S_AT, 224330_S_AT, 224958_AT, 213257_AT, 217892_S_AT, 236388_AT, 205383_S_AT, 214009_AT, 233027_AT, 201748_S_AT, 226605_AT, 1559942_AT, 226082_S_AT, 233899_X_AT, 226262_AT, 231815_AT, 237438_AT, 216823_AT, 202616_S_AT, 210716_S_AT, 1555920_A…	2699	2596	12782	1.29159	9.04598e-15	1.13075e-15	1.82937e-14
GO:0043228~non-membrane-bounded organelle	708	15.6707	1.20132e-17	240154_AT, 231921_AT, 239042_AT, 213427_AT, 214045_AT, 228190_AT, 203714_S_AT, 213007_AT, 203155_AT, 228323_AT, 221437_S_AT, 219862_S_AT, 208445_S_AT, 222590_S_AT, 224330_S_AT, 224958_AT, 213257_AT, 217892_S_AT, 236388_AT, 205383_S_AT, 214009_AT, 233027_AT, 201748_S_AT, 226605_AT, 1559942_AT, 226082_S_AT, 233899_X_AT, 226262_AT, 231815_AT, 237438_AT, 216823_AT, 202616_S_AT, 210716_S_AT, 1555920_A…	2699	2596	12782	1.29159	9.04598e-15	1.13075e-15	1.82937e-14
GO:0031975~envelope	216	4.78088	1.1742e-15	234304_S_AT, 34689_AT, 212316_AT, 236199_AT, 217317_S_AT, 213279_AT, 200993_AT, 225424_AT, 218981_AT, 218458_AT, 219862_S_AT, 218316_AT, 213257_AT, 244373_AT, 217550_AT, 204227_S_AT, 218073_S_AT, 1557360_AT, 226069_AT, 211762_S_AT, 230274_S_AT, 217491_X_AT, 200708_AT, 1555920_AT, 223091_X_AT, 200658_S_AT, 225901_AT, 242645_AT, 203194_S_AT, 229696_AT, 223192_AT, 229061_S_AT, 233630_AT, 218188_S_AT…	2699	622	12782	1.6446	9.19598e-13	1.02141e-13	1.86517e-12
GO:0045449~regulation of transcription	757	16.7552	1.45721e-15	212544_AT, 212385_AT, 221656_S_AT, 214108_AT, 235690_AT, 244458_AT, 237118_AT, 203155_AT, 202080_S_AT, 222867_S_AT, 228917_AT, 229885_AT, 222590_S_AT, 235841_AT, 208445_S_AT, 205383_S_AT, 214009_AT, 201748_S_AT, 226605_AT, 1559942_AT, 225452_AT, 207625_S_AT, 233899_X_AT, 226952_AT, 231815_AT, 231188_AT, 202616_S_AT, 206194_AT, 223393_S_AT, 1555920_AT, 41113_AT, 205089_AT, 201182_S_AT, 216902_S_AT…	3121	2601	13528	1.26152	6.87728e-12	3.43858e-12	2.73115e-12
GO:0031967~organelle envelope	215	4.75874	1.64002e-15	234304_S_AT, 34689_AT, 212316_AT, 236199_AT, 217317_S_AT, 213279_AT, 200993_AT, 225424_AT, 218981_AT, 218458_AT, 219862_S_AT, 218316_AT, 213257_AT, 244373_AT, 217550_AT, 204227_S_AT, 218073_S_AT, 1557360_AT, 226069_AT, 211762_S_AT, 230274_S_AT, 217491_X_AT, 200708_AT, 1555920_AT, 223091_X_AT, 200658_S_AT, 225901_AT, 242645_AT, 203194_S_AT, 229696_AT, 223192_AT, 229061_S_AT, 233630_AT, 218188_S_AT…	2699	620	12782	1.64226	1.254e-12	1.25344e-13	2.53131e-12
GO:0003723~RNA binding	255	5.64409	3.4423e-15	213152_S_AT, 201727_S_AT, 243149_AT, 218400_AT, 235470_AT, 212384_AT, 221287_AT, 242230_AT, 201085_S_AT, 201479_AT, 1555760_A_AT, 243796_AT, 1555947_AT, 223056_S_AT, 212901_S_AT, 1557504_AT, 225348_AT, 208765_S_AT, 212030_AT, 1555860_X_AT, 216212_S_AT, 206108_S_AT, 224958_AT, 218682_S_AT, 244396_AT, 231718_AT, 203785_S_AT, 209017_S_AT, 1557360_AT, 233027_AT, 201748_S_AT, 224766_AT, 213505_S_AT, 2…	2970	718	12983	1.55251	6.22946e-12	6.22946e-12	5.85088e-12
GO:0046907~intracellular transport	238	5.26782	7.64614e-15	234304_S_AT, 203504_S_AT, 207624_S_AT, 240154_AT, 230219_AT, 212384_AT, 1554638_AT, 213271_S_AT, 242230_AT, 203511_S_AT, 234351_X_AT, 237118_AT, 1555501_S_AT, 200993_AT, 242109_AT, 206857_S_AT, 223056_S_AT, 228190_AT, 1557504_AT, 225348_AT, 202080_S_AT, 215222_X_AT, 209824_S_AT, 220059_AT, 241216_AT, 218763_AT, 218316_AT, 208710_S_AT, 1557360_AT, 226069_AT, 209411_S_AT, 211762_S_AT, 211137_S_AT, …	3121	657	13528	1.57019	3.65025e-11	1.21675e-11	1.44995e-11
GO:0005829~cytosol	393	8.69854	1.6055e-14	221656_S_AT, 203511_S_AT, 225521_AT, 225278_AT, 228548_AT, 243442_X_AT, 206857_S_AT, 204385_AT, 228190_AT, 207671_S_AT, 215535_S_AT, 205588_S_AT, 225484_AT, 244396_AT, 233027_AT, 226605_AT, 230274_S_AT, 208971_AT, 201507_AT, 206853_S_AT, 216823_AT, 1565889_AT, 223182_S_AT, 219446_AT, 217521_AT, 211936_AT, 239988_AT, 35265_AT, 219387_AT, 204369_AT, 217294_S_AT, 202058_S_AT, 222924_AT, 218522_S_AT,…	2699	1330	12782	1.39938	1.2122e-11	1.10201e-12	2.45137e-11
GO:0006396~RNA processing	204	4.51527	2.98461e-14	203103_S_AT, 213152_S_AT, 214305_S_AT, 203599_S_AT, 222500_AT, 235470_AT, 212384_AT, 221287_AT, 242230_AT, 201479_AT, 214931_S_AT, 1555501_S_AT, 213427_AT, 212901_S_AT, 225902_AT, 202256_AT, 225348_AT, 208765_S_AT, 212030_AT, 216212_S_AT, 206108_S_AT, 1553274_A_AT, 231718_AT, 235390_AT, 213505_S_AT, 241937_S_AT, 226082_S_AT, 237438_AT, 212583_AT, 213815_X_AT, 228043_AT, 202809_S_AT, 212001_AT, 21…	3121	547	13528	1.61653	1.42307e-10	3.55767e-11	5.65437e-11
GO:0005730~nucleolus	231	5.11288	4.5868e-14	231921_AT, 240154_AT, 212996_S_AT, 232058_AT, 239042_AT, 229068_AT, 218006_S_AT, 242230_AT, 201479_AT, 213838_AT, 214931_S_AT, 223802_S_AT, 213427_AT, 214045_AT, 204180_S_AT, 228190_AT, 1557504_AT, 203155_AT, 218886_AT, 222590_S_AT, 203856_AT, 220370_S_AT, 216212_S_AT, 225184_AT, 205383_S_AT, 233027_AT, 201748_S_AT, 209725_AT, 1559942_AT, 203654_S_AT, 226082_S_AT, 233899_X_AT, 226262_AT, 231815_A…	2699	698	12782	1.5673	3.45267e-11	2.87725e-12	6.98219e-11
GO:0031090~organelle membrane	331	7.32625	1.31128e-13	223952_X_AT, 1554638_AT, 213271_S_AT, 41858_AT, 203511_S_AT, 206857_S_AT, 229506_AT, 219862_S_AT, 202013_S_AT, 218316_AT, 209275_S_AT, 213257_AT, 217550_AT, 218218_AT, 211137_S_AT, 228457_AT, 217491_X_AT, 200708_AT, 239851_AT, 223470_AT, 225008_AT, 235168_AT, 1555920_AT, 223091_X_AT, 212305_S_AT, 211936_AT, 229696_AT, 223192_AT, 233630_AT, 225033_AT, 218188_S_AT, 219006_AT, 240052_AT, 242197_X_AT…	2699	1096	12782	1.43025	9.87314e-11	7.5947e-12	1.99663e-10
GO:0045184~establishment of protein localization	264	5.84329	3.15958e-13	234304_S_AT, 212316_AT, 203504_S_AT, 207624_S_AT, 232058_AT, 1554638_AT, 213271_S_AT, 234351_X_AT, 202492_AT, 200993_AT, 242109_AT, 223056_S_AT, 228190_AT, 1557504_AT, 202080_S_AT, 201226_AT, 215222_X_AT, 209824_S_AT, 220059_AT, 218763_AT, 218316_AT, 208710_S_AT, 218073_S_AT, 226069_AT, 209411_S_AT, 211762_S_AT, 230274_S_AT, 239851_AT, 238034_AT, 209268_AT, 223027_AT, 1552625_A_AT, 223420_AT, 228…	3121	769	13528	1.48805	1.50559e-09	3.01119e-10	5.98266e-10
GO:0015031~protein transport	262	5.79903	3.20678e-13	234304_S_AT, 212316_AT, 203504_S_AT, 207624_S_AT, 232058_AT, 1554638_AT, 213271_S_AT, 234351_X_AT, 202492_AT, 200993_AT, 242109_AT, 223056_S_AT, 228190_AT, 1557504_AT, 202080_S_AT, 201226_AT, 215222_X_AT, 209824_S_AT, 220059_AT, 218763_AT, 218316_AT, 208710_S_AT, 218073_S_AT, 226069_AT, 209411_S_AT, 211762_S_AT, 230274_S_AT, 239851_AT, 238034_AT, 209268_AT, 223027_AT, 1552625_A_AT, 223420_AT, 228…	3121	762	13528	1.49034	1.52781e-09	2.54636e-10	6.07092e-10
GO:0005783~endoplasmic reticulum	294	6.5073	6.20501e-13	207565_S_AT, 226805_AT, 212316_AT, 224661_AT, 223952_X_AT, 201485_S_AT, 222750_S_AT, 201403_S_AT, 209667_AT, 203511_S_AT, 41858_AT, 213279_AT, 237118_AT, 239283_AT, 206857_S_AT, 1553954_AT, 229506_AT, 229850_AT, 201226_AT, 219373_AT, 56829_AT, 205584_AT, 231234_AT, 202867_S_AT, 218763_AT, 202013_S_AT, 215535_S_AT, 238279_X_AT, 223882_AT, 201688_S_AT, 219202_AT, 209275_S_AT, 211098_X_AT, 223325_AT…	2699	960	12782	1.45035	4.67239e-10	3.33742e-11	9.449e-10
GO:0046914~transition metal ion binding	779	17.2421	1.00364e-12	242565_X_AT, 212544_AT, 207727_S_AT, 210820_X_AT, 1570259_AT, 235690_AT, 1554638_AT, 221287_AT, 220417_S_AT, 244458_AT, 214045_AT, 229506_AT, 203155_AT, 228917_AT, 227678_AT, 229885_AT, 219862_S_AT, 208445_S_AT, 217892_S_AT, 205383_S_AT, 226605_AT, 235390_AT, 207625_S_AT, 1559121_S_AT, 233899_X_AT, 231815_AT, 228457_AT, 231188_AT, 210716_S_AT, 223393_S_AT, 239861_AT, 41113_AT, 205089_AT, 201182_S…	2970	2785	12983	1.22273	1.81659e-09	9.08296e-10	1.70547e-09
GO:0044429~mitochondrial part	199	4.4046	1.08282e-12	217317_S_AT, 219217_AT, 213279_AT, 222734_AT, 219220_X_AT, 213149_AT, 225424_AT, 201135_AT, 218046_S_AT, 218981_AT, 203646_AT, 221437_S_AT, 224330_S_AT, 201509_AT, 218316_AT, 231919_AT, 202942_AT, 213257_AT, 203785_S_AT, 244373_AT, 204227_S_AT, 209017_S_AT, 1557360_AT, 217491_X_AT, 200708_AT, 223091_X_AT, 223154_AT, 200658_S_AT, 225901_AT, 242645_AT, 244052_AT, 229696_AT, 223192_AT, 229061_S_AT, …	2699	595	12782	1.58392	8.15349e-10	5.43566e-11	1.64888e-09
GO:0003677~DNA binding	665	14.7189	1.69363e-12	212385_AT, 207727_S_AT, 214108_AT, 235690_AT, 220417_S_AT, 244458_AT, 203155_AT, 228917_AT, 208445_S_AT, 244396_AT, 205383_S_AT, 214009_AT, 201748_S_AT, 225452_AT, 207625_S_AT, 233899_X_AT, 201507_AT, 231188_AT, 202616_S_AT, 206194_AT, 223393_S_AT, 235009_AT, 41113_AT, 205089_AT, 232035_AT, 201182_S_AT, 210216_X_AT, 243037_AT, 238148_S_AT, 231953_AT, 1557322_AT, 229809_AT, 215773_X_AT, 227729_AT,…	2970	2331	12983	1.24709	3.0655e-09	1.02183e-09	2.87798e-09
GO:0019941~modification-dependent protein catabolic process	205	4.53741	3.1802e-12	220018_AT, 226035_AT, 218862_AT, 229267_AT, 225521_AT, 203117_S_AT, 228190_AT, 204531_S_AT, 218458_AT, 225328_AT, 220370_S_AT, 223651_X_AT, 217878_S_AT, 209017_S_AT, 225100_AT, 1559121_S_AT, 1559094_AT, 237408_AT, 227521_AT, 219538_AT, 201199_S_AT, 221542_S_AT, 226176_S_AT, 240016_AT, 200739_S_AT, 215908_AT, 200987_X_AT, 1558418_AT, 239988_AT, 223118_S_AT, 241520_X_AT, 232033_AT, 242887_AT, 22762…	3121	574	13528	1.54804	1.51538e-08	2.16483e-09	6.02149e-09
GO:0043632~modification-dependent macromolecule catabolic process	205	4.53741	3.1802e-12	220018_AT, 226035_AT, 218862_AT, 229267_AT, 225521_AT, 203117_S_AT, 228190_AT, 204531_S_AT, 218458_AT, 225328_AT, 220370_S_AT, 223651_X_AT, 217878_S_AT, 209017_S_AT, 225100_AT, 1559121_S_AT, 1559094_AT, 237408_AT, 227521_AT, 219538_AT, 201199_S_AT, 221542_S_AT, 226176_S_AT, 240016_AT, 200739_S_AT, 215908_AT, 200987_X_AT, 1558418_AT, 239988_AT, 223118_S_AT, 241520_X_AT, 232033_AT, 242887_AT, 22762…	3121	574	13528	1.54804	1.51538e-08	2.16483e-09	6.02149e-09
GO:0008104~protein localization	291	6.4409	3.6083e-12	234304_S_AT, 212316_AT, 203504_S_AT, 207624_S_AT, 232058_AT, 1554638_AT, 213271_S_AT, 234351_X_AT, 202492_AT, 200993_AT, 242109_AT, 223056_S_AT, 228190_AT, 1557504_AT, 202080_S_AT, 201226_AT, 215222_X_AT, 209824_S_AT, 220059_AT, 218763_AT, 218316_AT, 205588_S_AT, 203230_AT, 208710_S_AT, 218073_S_AT, 226069_AT, 209411_S_AT, 211762_S_AT, 230274_S_AT, 239851_AT, 238034_AT, 209268_AT, 223027_AT, 1552…	3121	882	13528	1.43009	1.71937e-08	2.14922e-09	6.83207e-09
GO:0008270~zinc ion binding	658	14.564	3.70014e-12	242565_X_AT, 212544_AT, 235690_AT, 1570259_AT, 1554638_AT, 221287_AT, 220417_S_AT, 244458_AT, 203155_AT, 228917_AT, 227678_AT, 229885_AT, 208445_S_AT, 217892_S_AT, 205383_S_AT, 235390_AT, 226605_AT, 207625_S_AT, 233899_X_AT, 1559121_S_AT, 231815_AT, 231188_AT, 210716_S_AT, 223393_S_AT, 41113_AT, 205089_AT, 239861_AT, 201182_S_AT, 225048_AT, 238148_S_AT, 210461_S_AT, 48825_AT, 222616_S_AT, 231953_…	2970	2311	12983	1.24464	6.69727e-09	1.67432e-09	6.28758e-09
GO:0030163~protein catabolic process	218	4.82514	5.05064e-12	220018_AT, 226035_AT, 218862_AT, 229267_AT, 225521_AT, 203117_S_AT, 228190_AT, 204531_S_AT, 218458_AT, 225328_AT, 220370_S_AT, 223651_X_AT, 217878_S_AT, 209275_S_AT, 229958_AT, 209017_S_AT, 225100_AT, 1559121_S_AT, 1559094_AT, 237408_AT, 227521_AT, 210385_S_AT, 219538_AT, 201199_S_AT, 221542_S_AT, 226176_S_AT, 240016_AT, 219340_S_AT, 200739_S_AT, 203327_AT, 215908_AT, 200987_X_AT, 1558418_AT, 239…	3121	622	13528	1.51917	2.40662e-08	2.67403e-09	9.56293e-09
GO:0044265~cellular macromolecule catabolic process	246	5.44489	8.94673e-12	220018_AT, 207727_S_AT, 226035_AT, 218862_AT, 229267_AT, 225521_AT, 203117_S_AT, 228190_AT, 204531_S_AT, 218458_AT, 225328_AT, 220370_S_AT, 223651_X_AT, 217878_S_AT, 229958_AT, 209017_S_AT, 225100_AT, 1559121_S_AT, 237408_AT, 1559094_AT, 227521_AT, 210385_S_AT, 219538_AT, 201199_S_AT, 221542_S_AT, 226176_S_AT, 240016_AT, 219340_S_AT, 203686_AT, 200739_S_AT, 210093_S_AT, 203327_AT, 215908_AT, 2009…	3121	725	13528	1.47074	4.26312e-08	4.26312e-09	1.69399e-08
GO:0044257~cellular protein catabolic process	211	4.67021	1.36308e-11	220018_AT, 226035_AT, 218862_AT, 229267_AT, 225521_AT, 203117_S_AT, 228190_AT, 204531_S_AT, 218458_AT, 225328_AT, 220370_S_AT, 223651_X_AT, 217878_S_AT, 229958_AT, 209017_S_AT, 225100_AT, 1559121_S_AT, 1559094_AT, 237408_AT, 227521_AT, 210385_S_AT, 219538_AT, 201199_S_AT, 221542_S_AT, 226176_S_AT, 240016_AT, 219340_S_AT, 200739_S_AT, 203327_AT, 215908_AT, 200987_X_AT, 1558418_AT, 239988_AT, 22311…	3121	603	13528	1.51672	6.49506e-08	5.9046e-09	2.58087e-08
GO:0051603~proteolysis involved in cellular protein catabolic process	210	4.64807	1.50504e-11	220018_AT, 226035_AT, 218862_AT, 229267_AT, 225521_AT, 203117_S_AT, 228190_AT, 204531_S_AT, 218458_AT, 225328_AT, 220370_S_AT, 223651_X_AT, 217878_S_AT, 209017_S_AT, 225100_AT, 1559121_S_AT, 1559094_AT, 237408_AT, 227521_AT, 210385_S_AT, 219538_AT, 201199_S_AT, 221542_S_AT, 226176_S_AT, 240016_AT, 200739_S_AT, 203327_AT, 215908_AT, 200987_X_AT, 1558418_AT, 239988_AT, 223118_S_AT, 241520_X_AT, 232…	3121	600	13528	1.51708	7.17152e-08	5.97627e-09	2.84966e-08
GO:0000166~nucleotide binding	635	14.0549	3.90197e-11	219217_AT, 221287_AT, 222734_AT, 205986_AT, 208445_S_AT, 222590_S_AT, 244396_AT, 226605_AT, 201748_S_AT, 226082_S_AT, 226262_AT, 206853_S_AT, 1552625_A_AT, 201182_S_AT, 233849_S_AT, 231996_AT, 237377_AT, 222682_S_AT, 216411_S_AT, 204369_AT, 209191_AT, 211297_S_AT, 211081_S_AT, 209039_X_AT, 220416_AT, 212720_AT, 218533_S_AT, 213107_AT, 213238_AT, 223430_AT, 222819_AT, 203385_AT, 217591_AT, 220964_…	2970	2245	12983	1.23645	7.06258e-08	1.41252e-08	6.63055e-08
GO:0030529~ribonucleoprotein complex	172	3.80699	4.97375e-11	203103_S_AT, 214305_S_AT, 203599_S_AT, 232058_AT, 222500_AT, 212384_AT, 235470_AT, 201479_AT, 213427_AT, 219220_X_AT, 218046_S_AT, 204531_S_AT, 1557504_AT, 208765_S_AT, 212030_AT, 221437_S_AT, 224330_S_AT, 216212_S_AT, 1553274_A_AT, 224958_AT, 231718_AT, 233027_AT, 209725_AT, 224766_AT, 213815_X_AT, 212583_AT, 216823_AT, 210093_S_AT, 223154_AT, 209482_AT, 203777_S_AT, 225751_AT, 224365_S_AT, 3526…	2699	515	12782	1.58167	3.74524e-08	2.34077e-09	7.57399e-08
GO:0009057~macromolecule catabolic process	257	5.68836	1.06377e-10	220018_AT, 207727_S_AT, 226035_AT, 218862_AT, 229267_AT, 225521_AT, 203117_S_AT, 228190_AT, 204531_S_AT, 218458_AT, 225328_AT, 220370_S_AT, 223651_X_AT, 217878_S_AT, 209275_S_AT, 229958_AT, 209017_S_AT, 225100_AT, 1559121_S_AT, 237408_AT, 1559094_AT, 227521_AT, 210385_S_AT, 219538_AT, 216064_S_AT, 201199_S_AT, 221542_S_AT, 226176_S_AT, 240016_AT, 219340_S_AT, 203686_AT, 200739_S_AT, 210093_S_AT, …	3121	781	13528	1.42634	5.06887e-07	3.89913e-08	2.01416e-07
GO:0016604~nuclear body	73	1.61576	1.38768e-10	203599_S_AT, 214305_S_AT, 212384_AT, 210985_S_AT, 204096_S_AT, 201085_S_AT, 201479_AT, 226862_AT, 225694_AT, 1555501_S_AT, 225691_AT, 204270_AT, 225902_AT, 212220_AT, 1557504_AT, 225348_AT, 210092_AT, 212030_AT, 232333_AT, 235841_AT, 216212_S_AT, 205063_AT, 231718_AT, 1557505_A_AT, 224315_AT, 226605_AT, 244633_AT, 203654_S_AT, 226952_AT, 209128_S_AT, 210093_S_AT, 1558418_AT, 1558088_A_AT, 204064_…	2699	168	12782	2.05783	1.04492e-07	6.14661e-09	2.11315e-07
GO:0070727~cellular macromolecule localization	153	3.38645	1.41465e-10	234304_S_AT, 207624_S_AT, 1554638_AT, 234351_X_AT, 200993_AT, 223056_S_AT, 242109_AT, 228190_AT, 1557504_AT, 202080_S_AT, 215222_X_AT, 209824_S_AT, 220059_AT, 218763_AT, 218316_AT, 208710_S_AT, 203230_AT, 226069_AT, 211762_S_AT, 209411_S_AT, 209268_AT, 223027_AT, 1552625_A_AT, 228747_AT, 205841_AT, 203194_S_AT, 209862_S_AT, 223028_S_AT, 218188_S_AT, 223620_AT, 202058_S_AT, 213741_S_AT, 201782_S_A…	3121	414	13528	1.60188	6.74081e-07	4.81487e-08	2.67852e-07
GO:0034613~cellular protein localization	152	3.36432	1.53897e-10	234304_S_AT, 207624_S_AT, 1554638_AT, 234351_X_AT, 200993_AT, 223056_S_AT, 242109_AT, 228190_AT, 1557504_AT, 202080_S_AT, 215222_X_AT, 220059_AT, 209824_S_AT, 218763_AT, 218316_AT, 208710_S_AT, 203230_AT, 226069_AT, 211762_S_AT, 209411_S_AT, 209268_AT, 223027_AT, 1552625_A_AT, 228747_AT, 205841_AT, 203194_S_AT, 209862_S_AT, 223028_S_AT, 218188_S_AT, 223620_AT, 202058_S_AT, 213741_S_AT, 201782_S_A…	3121	411	13528	1.60303	7.33321e-07	4.88881e-08	2.91391e-07
GO:0005635~nuclear envelope	84	1.85923	1.80946e-10	234304_S_AT, 34689_AT, 212316_AT, 236199_AT, 240168_AT, 32811_AT, 200993_AT, 218458_AT, 219862_S_AT, 225592_AT, 207707_S_AT, 217550_AT, 218073_S_AT, 228012_AT, 1557360_AT, 242875_AT, 226069_AT, 211762_S_AT, 235745_AT, 227117_AT, 230274_S_AT, 229317_AT, 1555920_AT, 202055_AT, 201692_AT, 218772_X_AT, 203194_S_AT, 228568_AT, 202058_S_AT, 1554556_A_AT, 213741_S_AT, 222583_S_AT, 212178_S_AT, 203546_AT…	2699	205	12782	1.94053	1.36252e-07	7.56958e-09	2.75543e-07
GO:0012505~endomembrane system	238	5.26782	2.69543e-10	234304_S_AT, 34689_AT, 212316_AT, 224661_AT, 43427_AT, 223952_X_AT, 236199_AT, 213271_S_AT, 203511_S_AT, 41858_AT, 200993_AT, 206857_S_AT, 229506_AT, 229850_AT, 218458_AT, 219373_AT, 219862_S_AT, 241216_AT, 202013_S_AT, 238279_X_AT, 231926_AT, 209275_S_AT, 215626_AT, 217550_AT, 218073_S_AT, 1557360_AT, 207926_AT, 204627_S_AT, 226069_AT, 211762_S_AT, 230274_S_AT, 211137_S_AT, 228457_AT, 239851_AT,…	2699	782	12782	1.44134	2.02966e-07	1.06824e-08	4.10458e-07
GO:0016071~mRNA metabolic process	139	3.07658	2.97226e-10	213152_S_AT, 203103_S_AT, 201727_S_AT, 214305_S_AT, 203599_S_AT, 229841_AT, 222500_AT, 203377_S_AT, 235470_AT, 212384_AT, 221287_AT, 238923_AT, 214931_S_AT, 1555501_S_AT, 212901_S_AT, 202256_AT, 203117_S_AT, 225348_AT, 208765_S_AT, 210092_AT, 212030_AT, 218672_AT, 202199_S_AT, 229083_AT, 202689_AT, 206108_S_AT, 1553274_A_AT, 205063_AT, 231718_AT, 213359_AT, 243201_AT, 224315_AT, 239014_AT, 235390…	3121	370	13528	1.62837	1.41628e-06	8.85176e-08	5.62771e-07
GO:0005643~nuclear pore	43	0.951749	3.38266e-10	234304_S_AT, 207438_S_AT, 212316_AT, 203362_S_AT, 240168_AT, 218305_AT, 202153_S_AT, 242712_X_AT, 32811_AT, 200993_AT, 222523_AT, 208761_S_AT, 204003_S_AT, 207707_S_AT, 209225_X_AT, 218073_S_AT, 211762_S_AT, 227117_AT, 230274_S_AT, 228902_AT, 202056_AT, 238108_AT, 229317_AT, 202055_AT, 226561_AT, 203194_S_AT, 226922_AT, 228709_AT, 202058_S_AT, 213741_S_AT, 218295_S_AT, 222583_S_AT, 225766_S_AT, 2…	2699	79	12782	2.57773	2.54714e-07	1.27357e-08	5.15108e-07
GO:0006886~intracellular protein transport	140	3.09872	3.38671e-10	234304_S_AT, 215764_X_AT, 207624_S_AT, 235033_AT, 240168_AT, 201543_S_AT, 200698_AT, 1554638_AT, 234351_X_AT, 203972_S_AT, 200993_AT, 202264_S_AT, 242109_AT, 201821_S_AT, 223056_S_AT, 208633_S_AT, 228190_AT, 235647_AT, 1557504_AT, 202080_S_AT, 215222_X_AT, 209824_S_AT, 220059_AT, 218763_AT, 218316_AT, 229969_AT, 220917_S_AT, 207707_S_AT, 208710_S_AT, 223450_S_AT, 1557505_A_AT, 238289_AT, 225036_A…	3121	374	13528	1.62254	1.61377e-06	9.49276e-08	6.41245e-07
GO:0005694~chromosome	154	3.40859	4.66041e-10	212332_AT, 230219_AT, 203098_AT, 203046_S_AT, 225026_AT, 204531_S_AT, 213007_AT, 203155_AT, 228323_AT, 212264_S_AT, 209902_AT, 208445_S_AT, 217721_AT, 208527_X_AT, 229983_AT, 208490_X_AT, 1557360_AT, 214009_AT, 202616_S_AT, 210716_S_AT, 1555920_AT, 200739_S_AT, 201555_AT, 231764_AT, 232035_AT, 211874_S_AT, 201182_S_AT, 213984_AT, 205038_AT, 208523_X_AT, 206500_S_AT, 203194_S_AT, 201774_S_AT, 2090…	2699	460	12782	1.58547	3.50928e-07	1.67109e-08	7.09682e-07
GO:0044427~chromosomal part	134	2.96591	5.14234e-10	227718_AT, 212332_AT, 203098_AT, 230219_AT, 207156_AT, 203046_S_AT, 225026_AT, 228323_AT, 221582_AT, 212264_S_AT, 1554251_AT, 225030_AT, 209902_AT, 208445_S_AT, 1565823_AT, 217721_AT, 201663_S_AT, 208527_X_AT, 208490_X_AT, 229983_AT, 207707_S_AT, 209257_S_AT, 239654_AT, 214009_AT, 242875_AT, 220936_S_AT, 202616_S_AT, 210716_S_AT, 1555920_AT, 200739_S_AT, 201555_AT, 232035_AT, 231764_AT, 201182_S_…	2699	386	12782	1.64404	3.87218e-07	1.76008e-08	7.83071e-07
GO:0016568~chromatin modification	109	2.41257	7.18875e-10	219433_AT, 242316_AT, 225217_S_AT, 212332_AT, 223275_AT, 219444_AT, 212080_AT, 223566_S_AT, 202261_AT, 225026_AT, 203155_AT, 229885_AT, 209271_AT, 210719_S_AT, 208445_S_AT, 222544_S_AT, 212997_S_AT, 225184_AT, 239654_AT, 214009_AT, 214861_AT, 209053_S_AT, 218173_S_AT, 202624_S_AT, 222806_S_AT, 1555920_AT, 223915_AT, 231764_AT, 235096_AT, 222807_AT, 201182_S_AT, 211874_S_AT, 241458_AT, 200658_S_AT…	3121	274	13528	1.72431	3.42543e-06	1.90302e-07	1.36113e-06
GO:0006397~mRNA processing	122	2.70031	1.77894e-09	213152_S_AT, 203103_S_AT, 214305_S_AT, 203599_S_AT, 229841_AT, 203377_S_AT, 222500_AT, 235470_AT, 212384_AT, 221287_AT, 238923_AT, 214931_S_AT, 1555501_S_AT, 212901_S_AT, 202256_AT, 225348_AT, 208765_S_AT, 210092_AT, 212030_AT, 218672_AT, 202199_S_AT, 229083_AT, 202689_AT, 1553274_A_AT, 206108_S_AT, 205063_AT, 231718_AT, 213359_AT, 243201_AT, 224315_AT, 239014_AT, 235390_AT, 213505_S_AT, 235745_A…	3121	321	13528	1.64738	8.4766e-06	4.46139e-07	3.36826e-06
GO:0051276~chromosome organization	169	3.74059	2.56102e-09	212332_AT, 203098_AT, 219444_AT, 223566_S_AT, 201479_AT, 204749_AT, 225026_AT, 203155_AT, 242352_AT, 229885_AT, 208445_S_AT, 210719_S_AT, 223651_X_AT, 216212_S_AT, 208527_X_AT, 208490_X_AT, 225184_AT, 214009_AT, 201748_S_AT, 218173_S_AT, 223915_AT, 1555920_AT, 232035_AT, 235096_AT, 231764_AT, 211874_S_AT, 201182_S_AT, 200658_S_AT, 241458_AT, 208523_X_AT, 1564521_X_AT, 201774_S_AT, 223818_S_AT, 22…	3121	485	13528	1.51038	1.22032e-05	6.10163e-07	4.84907e-06
GO:0015630~microtubule cytoskeleton	174	3.85126	3.61896e-09	235653_S_AT, 230219_AT, 227105_AT, 228190_AT, 204531_S_AT, 203714_S_AT, 235031_AT, 215222_X_AT, 209194_AT, 1557347_AT, 241216_AT, 217721_AT, 217878_S_AT, 205588_S_AT, 225484_AT, 213257_AT, 203230_AT, 229417_AT, 210716_S_AT, 201896_S_AT, 202890_AT, 1555920_AT, 201555_AT, 232837_AT, 209862_S_AT, 1554690_A_AT, 228962_AT, 209191_AT, 222924_AT, 218522_S_AT, 200623_S_AT, 226291_AT, 200730_S_AT, 242787_…	2699	549	12782	1.50097	2.72507e-06	1.18482e-07	5.51091e-06
GO:0005794~Golgi apparatus	255	5.64409	4.04107e-09	235333_AT, 203504_S_AT, 43427_AT, 207624_S_AT, 236160_AT, 213271_S_AT, 203511_S_AT, 41858_AT, 213279_AT, 205607_S_AT, 203155_AT, 56829_AT, 231234_AT, 218763_AT, 202013_S_AT, 213650_AT, 238279_X_AT, 224716_AT, 224958_AT, 209275_S_AT, 211098_X_AT, 204489_S_AT, 208710_S_AT, 1556527_A_AT, 209411_S_AT, 211137_S_AT, 219634_AT, 239851_AT, 224813_AT, 211685_S_AT, 209268_AT, 213659_AT, 211061_S_AT, 225059…	2699	872	12782	1.3849	3.04292e-06	1.26789e-07	6.1537e-06
GO:0017076~purine nucleotide binding	537	11.8858	1.14564e-08	203504_S_AT, 213578_AT, 212384_AT, 219217_AT, 221287_AT, 215184_AT, 205607_S_AT, 222734_AT, 205986_AT, 228548_AT, 1557504_AT, 209902_AT, 209799_AT, 222590_S_AT, 208445_S_AT, 203856_AT, 217721_AT, 244396_AT, 209360_S_AT, 226605_AT, 211137_S_AT, 226262_AT, 206853_S_AT, 1569540_AT, 1552625_A_AT, 201182_S_AT, 233849_S_AT, 211936_AT, 212533_AT, 231996_AT, 237377_AT, 216411_S_AT, 222682_S_AT, 204369_AT…	2970	1918	12983	1.2239	2.07359e-05	3.45602e-06	1.94677e-05
GO:0008380~RNA splicing	108	2.39044	1.59087e-08	213152_S_AT, 203103_S_AT, 214305_S_AT, 203599_S_AT, 203377_S_AT, 222500_AT, 235470_AT, 212384_AT, 214931_S_AT, 1555501_S_AT, 226591_AT, 225902_AT, 202256_AT, 225348_AT, 208765_S_AT, 210092_AT, 212030_AT, 218672_AT, 202199_S_AT, 229083_AT, 202689_AT, 1553274_A_AT, 206108_S_AT, 205063_AT, 231718_AT, 213359_AT, 243201_AT, 224315_AT, 239014_AT, 235390_AT, 213505_S_AT, 210172_AT, 213815_X_AT, 212583_A…	3121	284	13528	1.64833	7.58022e-05	3.60976e-06	3.01218e-05
GO:0005524~ATP binding	425	9.40682	1.78523e-08	203504_S_AT, 213578_AT, 212384_AT, 219217_AT, 221287_AT, 215184_AT, 205607_S_AT, 222734_AT, 205986_AT, 209902_AT, 209799_AT, 222590_S_AT, 208445_S_AT, 203856_AT, 244396_AT, 209360_S_AT, 226605_AT, 211137_S_AT, 226262_AT, 206853_S_AT, 1569540_AT, 1552625_A_AT, 201182_S_AT, 211936_AT, 212533_AT, 231996_AT, 237377_AT, 216411_S_AT, 204369_AT, 209623_AT, 211297_S_AT, 211081_S_AT, 1552788_A_AT, 209039_…	2970	1477	12983	1.25784	3.23122e-05	4.61609e-06	3.03361e-05
GO:0032553~ribonucleotide binding	515	11.3988	1.8594e-08	203504_S_AT, 213578_AT, 212384_AT, 219217_AT, 221287_AT, 215184_AT, 205607_S_AT, 222734_AT, 205986_AT, 228548_AT, 1557504_AT, 209902_AT, 209799_AT, 222590_S_AT, 208445_S_AT, 203856_AT, 217721_AT, 244396_AT, 209360_S_AT, 226605_AT, 211137_S_AT, 226262_AT, 206853_S_AT, 1569540_AT, 1552625_A_AT, 201182_S_AT, 233849_S_AT, 211936_AT, 212533_AT, 231996_AT, 237377_AT, 216411_S_AT, 204369_AT, 209191_AT, …	2970	1836	12983	1.22618	3.36547e-05	4.20689e-06	3.15964e-05
GO:0032555~purine ribonucleotide binding	515	11.3988	1.8594e-08	203504_S_AT, 213578_AT, 212384_AT, 219217_AT, 221287_AT, 215184_AT, 205607_S_AT, 222734_AT, 205986_AT, 228548_AT, 1557504_AT, 209902_AT, 209799_AT, 222590_S_AT, 208445_S_AT, 203856_AT, 217721_AT, 244396_AT, 209360_S_AT, 226605_AT, 211137_S_AT, 226262_AT, 206853_S_AT, 1569540_AT, 1552625_A_AT, 201182_S_AT, 233849_S_AT, 211936_AT, 212533_AT, 231996_AT, 237377_AT, 216411_S_AT, 204369_AT, 209191_AT, …	2970	1836	12983	1.22618	3.36547e-05	4.20689e-06	3.15964e-05
GO:0030554~adenyl nucleotide binding	449	9.93803	2.82476e-08	203504_S_AT, 213578_AT, 212384_AT, 219217_AT, 221287_AT, 215184_AT, 205607_S_AT, 222734_AT, 205986_AT, 209902_AT, 209799_AT, 222590_S_AT, 208445_S_AT, 203856_AT, 244396_AT, 209360_S_AT, 226605_AT, 211137_S_AT, 226262_AT, 206853_S_AT, 1569540_AT, 1552625_A_AT, 201182_S_AT, 211936_AT, 212533_AT, 231996_AT, 237377_AT, 216411_S_AT, 204369_AT, 209623_AT, 211297_S_AT, 211081_S_AT, 1552788_A_AT, 209039_…	2970	1577	12983	1.24461	5.11268e-05	5.68088e-06	4.80004e-05
GO:0005815~microtubule organizing center	92	2.0363	2.88647e-08	226584_S_AT, 230219_AT, 227105_AT, 218013_X_AT, 210389_X_AT, 214221_AT, 204531_S_AT, 209194_AT, 1557347_AT, 225030_AT, 217878_S_AT, 205588_S_AT, 225484_AT, 226120_AT, 208621_S_AT, 203688_AT, 201291_S_AT, 204491_AT, 203660_S_AT, 203562_AT, 214707_X_AT, 201555_AT, 1556646_AT, 209862_S_AT, 1554690_A_AT, 228962_AT, 223981_AT, 222924_AT, 212832_S_AT, 200623_S_AT, 226291_AT, 212308_AT, 52285_F_AT, 2252…	2699	253	12782	1.72212	2.17349e-05	8.69404e-07	4.39549e-05
GO:0032559~adenyl ribonucleotide binding	428	9.47322	3.79438e-08	203504_S_AT, 213578_AT, 212384_AT, 219217_AT, 221287_AT, 215184_AT, 205607_S_AT, 222734_AT, 205986_AT, 209902_AT, 209799_AT, 222590_S_AT, 208445_S_AT, 203856_AT, 244396_AT, 209360_S_AT, 226605_AT, 211137_S_AT, 226262_AT, 206853_S_AT, 1569540_AT, 1552625_A_AT, 201182_S_AT, 211936_AT, 212533_AT, 231996_AT, 237377_AT, 216411_S_AT, 204369_AT, 209623_AT, 211297_S_AT, 211081_S_AT, 1552788_A_AT, 209039_…	2970	1497	12983	1.2498	6.86759e-05	6.8678e-06	6.4477e-05
GO:0051252~regulation of RNA metabolic process	511	11.3103	3.95908e-08	212544_AT, 204849_AT, 212385_AT, 206036_S_AT, 221656_S_AT, 232483_AT, 223566_S_AT, 1555760_A_AT, 229700_AT, 237456_AT, 236562_AT, 204531_S_AT, 202080_S_AT, 228917_AT, 229885_AT, 209211_AT, 235841_AT, 220019_S_AT, 1556527_A_AT, 209360_S_AT, 217550_AT, 226605_AT, 1559942_AT, 207625_S_AT, 225452_AT, 1554770_X_AT, 215022_X_AT, 229794_AT, 226066_AT, 231815_AT, 231188_AT, 219711_AT, 202616_S_AT, 206194…	3121	1813	13528	1.2217	0.000188633	8.57498e-06	7.49618e-05
GO:0006325~chromatin organization	134	2.96591	4.156e-08	219433_AT, 242316_AT, 225217_S_AT, 212332_AT, 203098_AT, 223275_AT, 219444_AT, 212080_AT, 223566_S_AT, 207156_AT, 229697_AT, 202261_AT, 204749_AT, 225026_AT, 203155_AT, 221582_AT, 1554251_AT, 229885_AT, 209271_AT, 210719_S_AT, 208445_S_AT, 222544_S_AT, 212997_S_AT, 208527_X_AT, 208490_X_AT, 225184_AT, 239654_AT, 214009_AT, 201748_S_AT, 214861_AT, 209053_S_AT, 220936_S_AT, 218173_S_AT, 202624_S_AT…	3121	378	13528	1.53657	0.000198014	8.61011e-06	7.86903e-05
GO:0005759~mitochondrial matrix	84	1.85923	5.06389e-08	228059_X_AT, 219217_AT, 222734_AT, 213149_AT, 219220_X_AT, 201135_AT, 203115_AT, 218046_S_AT, 215210_S_AT, 203646_AT, 221437_S_AT, 217919_S_AT, 1554152_A_AT, 224330_S_AT, 201509_AT, 205273_S_AT, 209605_AT, 202942_AT, 231919_AT, 203785_S_AT, 208369_S_AT, 209017_S_AT, 1557360_AT, 202070_S_AT, 200708_AT, 224873_S_AT, 40255_AT, 214224_S_AT, 223154_AT, 208541_X_AT, 234084_X_AT, 205811_AT, 223515_S_AT,…	2699	227	12782	1.75247	3.81304e-05	1.46658e-06	7.71124e-05
GO:0031980~mitochondrial lumen	84	1.85923	5.06389e-08	228059_X_AT, 219217_AT, 222734_AT, 213149_AT, 219220_X_AT, 201135_AT, 203115_AT, 218046_S_AT, 215210_S_AT, 203646_AT, 221437_S_AT, 217919_S_AT, 1554152_A_AT, 224330_S_AT, 201509_AT, 205273_S_AT, 209605_AT, 202942_AT, 231919_AT, 203785_S_AT, 208369_S_AT, 209017_S_AT, 1557360_AT, 202070_S_AT, 200708_AT, 224873_S_AT, 40255_AT, 214224_S_AT, 223154_AT, 208541_X_AT, 234084_X_AT, 205811_AT, 223515_S_AT,…	2699	227	12782	1.75247	3.81304e-05	1.46658e-06	7.71124e-05
GO:0000151~ubiquitin ligase complex	43	0.951749	5.15191e-08	203103_S_AT, 210685_S_AT, 220018_AT, 223802_S_AT, 204531_S_AT, 228045_AT, 239651_AT, 213204_AT, 223651_X_AT, 236994_AT, 209005_AT, 223240_AT, 227545_AT, 203078_AT, 210257_X_AT, 225591_AT, 1566507_A_AT, 1559094_AT, 237025_AT, 220237_AT, 201881_S_AT, 218632_AT, 223031_S_AT, 1557370_S_AT, 221196_X_AT, 238686_AT, 231769_AT, 227625_S_AT, 1559096_X_AT, 242829_X_AT, 243286_AT, 1558710_AT, 1554806_A_AT, …	2699	90	12782	2.26267	3.87931e-05	1.43681e-06	7.84528e-05
GO:0005813~centrosome	83	1.8371	5.73301e-08	226584_S_AT, 230219_AT, 227105_AT, 218013_X_AT, 210389_X_AT, 214221_AT, 209194_AT, 1557347_AT, 225030_AT, 217878_S_AT, 205588_S_AT, 225484_AT, 226120_AT, 201291_S_AT, 204491_AT, 203660_S_AT, 203562_AT, 214707_X_AT, 201555_AT, 1556646_AT, 209862_S_AT, 1554690_A_AT, 228962_AT, 223981_AT, 222924_AT, 212832_S_AT, 200623_S_AT, 226291_AT, 212308_AT, 52285_F_AT, 225297_AT, 222270_AT, 1554155_AT, 204251_…	2699	224	12782	1.75479	4.31686e-05	1.54177e-06	8.73017e-05
GO:0046930~pore complex	44	0.973882	1.0747e-07	234304_S_AT, 207438_S_AT, 212316_AT, 203362_S_AT, 240168_AT, 218305_AT, 202153_S_AT, 242712_X_AT, 32811_AT, 200993_AT, 202264_S_AT, 222523_AT, 208761_S_AT, 204003_S_AT, 207707_S_AT, 209225_X_AT, 218073_S_AT, 211762_S_AT, 227117_AT, 230274_S_AT, 228902_AT, 202056_AT, 238108_AT, 229317_AT, 202055_AT, 226561_AT, 203194_S_AT, 226922_AT, 228709_AT, 202058_S_AT, 213741_S_AT, 218295_S_AT, 222583_S_AT, 2…	2699	95	12782	2.19344	8.09217e-05	2.79051e-06	0.000163654
GO:0005819~spindle	60	1.32802	1.09536e-07	204812_AT, 209659_S_AT, 218602_S_AT, 213956_AT, 203362_S_AT, 228423_AT, 230219_AT, 227105_AT, 203448_S_AT, 234984_AT, 1554089_S_AT, 214876_S_AT, 229181_S_AT, 228727_AT, 200747_S_AT, 244298_AT, 203094_AT, 223380_S_AT, 235031_AT, 212309_AT, 209717_AT, 217721_AT, 1565823_AT, 211337_S_AT, 240939_X_AT, 217878_S_AT, 209257_S_AT, 235349_AT, 222665_AT, 205449_AT, 222685_AT, 214700_X_AT, 202477_S_AT, 1554…	2699	147	12782	1.93299	8.24771e-05	2.74935e-06	0.0001668
GO:0016879~ligase activity, forming carbon-nitrogen bonds	89	1.9699	1.09929e-07	203103_S_AT, 225520_AT, 219433_AT, 43427_AT, 220018_AT, 217317_S_AT, 223566_S_AT, 211034_S_AT, 223802_S_AT, 205558_AT, 214045_AT, 216251_S_AT, 204531_S_AT, 239651_AT, 223651_X_AT, 217817_AT, 227264_AT, 206183_S_AT, 225591_AT, 244633_AT, 1566507_A_AT, 1559094_AT, 220237_AT, 227293_AT, 223915_AT, 200739_S_AT, 217521_AT, 1558418_AT, 239988_AT, 242281_AT, 1558088_A_AT, 231769_AT, 227625_S_AT, 207231_…	2970	231	12983	1.68421	0.000198951	1.80881e-05	0.000186799
GO:0008134~transcription factor binding	169	3.74059	1.14537e-07	212544_AT, 212385_AT, 236160_AT, 214108_AT, 223566_S_AT, 232483_AT, 226862_AT, 214179_S_AT, 237456_AT, 204531_S_AT, 209824_S_AT, 232333_AT, 222590_S_AT, 235841_AT, 225184_AT, 215605_AT, 217550_AT, 209360_S_AT, 226069_AT, 238940_AT, 1559942_AT, 225452_AT, 204702_S_AT, 207625_S_AT, 209204_AT, 202616_S_AT, 1569540_AT, 223915_AT, 201421_S_AT, 211874_S_AT, 201182_S_AT, 1558418_AT, 209002_S_AT, 217294_…	2970	513	12983	1.44008	0.000207291	1.72759e-05	0.000194631
GO:0001883~purine nucleoside binding	450	9.96016	1.49741e-07	203504_S_AT, 213578_AT, 212384_AT, 219217_AT, 221287_AT, 215184_AT, 205607_S_AT, 222734_AT, 205986_AT, 1557504_AT, 209902_AT, 209799_AT, 222590_S_AT, 208445_S_AT, 203856_AT, 244396_AT, 209360_S_AT, 226605_AT, 211137_S_AT, 226262_AT, 206853_S_AT, 1569540_AT, 1552625_A_AT, 201182_S_AT, 211936_AT, 212533_AT, 231996_AT, 237377_AT, 216411_S_AT, 204369_AT, 209623_AT, 211297_S_AT, 211081_S_AT, 1552788_A…	2970	1601	12983	1.22868	0.000270995	2.08483e-05	0.000254451
GO:0001882~nucleoside binding	452	10.0044	1.90644e-07	203504_S_AT, 213578_AT, 212384_AT, 219217_AT, 221287_AT, 215184_AT, 205607_S_AT, 222734_AT, 205986_AT, 1557504_AT, 209902_AT, 209799_AT, 222590_S_AT, 208445_S_AT, 203856_AT, 219459_AT, 244396_AT, 209360_S_AT, 226605_AT, 211137_S_AT, 226262_AT, 206853_S_AT, 1569540_AT, 1552625_A_AT, 201182_S_AT, 211936_AT, 212533_AT, 231996_AT, 237377_AT, 216411_S_AT, 204369_AT, 209623_AT, 211297_S_AT, 211081_S_AT…	2970	1612	12983	1.22572	0.000345006	2.46472e-05	0.000323956
GO:0016607~nuclear speck	46	1.01815	1.96996e-07	228487_S_AT, 203599_S_AT, 201070_X_AT, 214305_S_AT, 212384_AT, 204096_S_AT, 238700_AT, 201085_S_AT, 226862_AT, 225694_AT, 225691_AT, 1555501_S_AT, 227246_AT, 230375_AT, 37433_AT, 225902_AT, 212220_AT, 1557504_AT, 225348_AT, 210092_AT, 212030_AT, 225507_AT, 235841_AT, 232333_AT, 201742_X_AT, 208761_S_AT, 201224_S_AT, 231718_AT, 1557505_A_AT, 1554248_AT, 226605_AT, 244633_AT, 212028_AT, 226952_AT, …	2699	103	12782	2.11503	0.000148327	4.78509e-06	0.000299983
GO:0003713~transcription coactivator activity	83	1.8371	2.21525e-07	236160_AT, 214108_AT, 210985_S_AT, 232483_AT, 204531_S_AT, 235841_AT, 232333_AT, 225184_AT, 215605_AT, 217550_AT, 244633_AT, 204702_S_AT, 218259_AT, 225452_AT, 218524_AT, 238520_AT, 201421_S_AT, 222771_S_AT, 1558418_AT, 209002_S_AT, 201075_S_AT, 48825_AT, 233588_X_AT, 211297_S_AT, 222616_S_AT, 201782_S_AT, 206715_AT, 225455_AT, 242048_AT, 204349_AT, 202949_S_AT, 211584_S_AT, 1557257_AT, 208371_S_…	2970	214	12983	1.69544	0.00040088	2.67303e-05	0.000376432
GO:0065003~macromolecular complex assembly	210	4.64807	2.38207e-07	234304_S_AT, 203504_S_AT, 240154_AT, 239042_AT, 232483_AT, 214931_S_AT, 200993_AT, 204749_AT, 219166_AT, 1557504_AT, 225348_AT, 229885_AT, 217721_AT, 206108_S_AT, 208527_X_AT, 208490_X_AT, 231718_AT, 203230_AT, 209017_S_AT, 218073_S_AT, 201890_AT, 225452_AT, 224813_AT, 232035_AT, 201421_S_AT, 211874_S_AT, 203327_AT, 208523_X_AT, 1564521_X_AT, 244052_AT, 203194_S_AT, 225742_AT, 223818_S_AT, 237377…	3121	665	13528	1.36879	0.00113441	4.72929e-05	0.000451023
GO:0043933~macromolecular complex subunit organization	222	4.91368	2.43176e-07	234304_S_AT, 203504_S_AT, 240154_AT, 239042_AT, 232483_AT, 214931_S_AT, 200993_AT, 204749_AT, 219166_AT, 1557504_AT, 225348_AT, 229885_AT, 217721_AT, 206108_S_AT, 208527_X_AT, 208490_X_AT, 231718_AT, 203230_AT, 209017_S_AT, 218073_S_AT, 201890_AT, 225452_AT, 224813_AT, 232035_AT, 201421_S_AT, 211874_S_AT, 203327_AT, 208523_X_AT, 1564521_X_AT, 244052_AT, 203194_S_AT, 225742_AT, 223818_S_AT, 237377…	3121	710	13528	1.3553	0.00115806	4.63483e-05	0.000460432
GO:0007049~cell cycle	239	5.28995	3.11407e-07	212332_AT, 230219_AT, 229267_AT, 225521_AT, 203521_S_AT, 203046_S_AT, 209901_X_AT, 213007_AT, 204531_S_AT, 215222_X_AT, 242352_AT, 209194_AT, 209902_AT, 210719_S_AT, 217721_AT, 223651_X_AT, 217878_S_AT, 202927_AT, 215051_X_AT, 218218_AT, 211762_S_AT, 230681_AT, 201507_AT, 226436_AT, 224848_AT, 201199_S_AT, 226517_AT, 217598_AT, 210716_S_AT, 201896_S_AT, 201555_AT, 210216_X_AT, 213984_AT, 200987_X…	3121	776	13528	1.33498	0.00148275	5.70697e-05	0.00058962
GO:0006259~DNA metabolic process	166	3.67419	3.65645e-07	34689_AT, 203103_S_AT, 207727_S_AT, 201479_AT, 217618_X_AT, 204531_S_AT, 213007_AT, 218851_S_AT, 227678_AT, 209902_AT, 1563621_AT, 216212_S_AT, 204227_S_AT, 209017_S_AT, 201890_AT, 211762_S_AT, 225452_AT, 230681_AT, 206254_AT, 217598_AT, 202809_S_AT, 222889_AT, 205415_S_AT, 203686_AT, 201555_AT, 210216_X_AT, 200658_S_AT, 202276_AT, 203194_S_AT, 201513_AT, 231769_AT, 219387_AT, 48825_AT, 211297_S_…	3121	506	13528	1.42199	0.00174078	6.45275e-05	0.000692315
GO:0006511~ubiquitin-dependent protein catabolic process	91	2.01417	4.23738e-07	204616_AT, 226035_AT, 229267_AT, 225214_AT, 225521_AT, 203117_S_AT, 239651_AT, 213204_AT, 220370_S_AT, 223651_X_AT, 217878_S_AT, 226730_S_AT, 223240_AT, 201067_AT, 203078_AT, 210257_X_AT, 1559121_S_AT, 201199_S_AT, 221542_S_AT, 226176_S_AT, 243216_X_AT, 227293_AT, 200987_X_AT, 223118_S_AT, 201868_S_AT, 1558088_A_AT, 232033_AT, 231769_AT, 227625_S_AT, 222282_AT, 220419_S_AT, 224471_S_AT, 218172_S_…	3121	242	13528	1.62992	0.00201707	7.21085e-05	0.000802308
GO:0019899~enzyme binding	169	3.74059	4.70821e-07	203504_S_AT, 207721_X_AT, 223566_S_AT, 200993_AT, 225278_AT, 228548_AT, 242109_AT, 204531_S_AT, 218309_AT, 222590_S_AT, 41577_AT, 215626_AT, 203230_AT, 236388_AT, 209017_S_AT, 226605_AT, 211762_S_AT, 209411_S_AT, 1569540_AT, 223915_AT, 1555920_AT, 205841_AT, 1558418_AT, 226049_AT, 209080_X_AT, 202795_X_AT, 237377_AT, 227625_S_AT, 219387_AT, 1563473_AT, 243852_AT, 221916_AT, 211955_AT, 218708_AT, …	2970	523	12983	1.41255	0.000851824	5.32602e-05	0.000800053
GO:0044454~nuclear chromosome part	51	1.12882	4.72232e-07	229167_AT, 225120_AT, 227718_AT, 233360_AT, 203448_S_AT, 244872_AT, 212073_AT, 203046_S_AT, 212264_S_AT, 209902_AT, 202911_AT, 208393_S_AT, 209715_AT, 225396_AT, 209257_S_AT, 205053_AT, 202520_S_AT, 39705_AT, 235425_AT, 204254_S_AT, 238108_AT, 1555920_AT, 201555_AT, 231764_AT, 218242_S_AT, 238005_S_AT, 205134_S_AT, 239228_AT, 209002_S_AT, 1558088_A_AT, 1565975_AT, 200990_AT, 235215_AT, 210028_S_A…	2699	122	12782	1.97973	0.000355528	1.11121e-05	0.000719108
GO:0005740~mitochondrial envelope	132	2.92165	4.89226e-07	228940_AT, 221550_AT, 219680_AT, 203606_AT, 1559691_AT, 223320_S_AT, 217317_S_AT, 203551_S_AT, 211207_S_AT, 223354_X_AT, 213279_AT, 215966_X_AT, 225424_AT, 202264_S_AT, 203115_AT, 201821_S_AT, 218981_AT, 203089_S_AT, 223191_AT, 1554152_A_AT, 217772_S_AT, 223808_S_AT, 218316_AT, 209605_AT, 210007_S_AT, 235747_AT, 213257_AT, 244373_AT, 208369_S_AT, 204227_S_AT, 222132_S_AT, 225036_AT, 242875_AT, 22…	2699	419	12782	1.49196	0.000368319	1.11632e-05	0.000744986
GO:0030528~transcription regulator activity	424	9.38468	5.03471e-07	204849_AT, 212385_AT, 206036_S_AT, 236160_AT, 214108_AT, 232483_AT, 223566_S_AT, 237456_AT, 204531_S_AT, 222867_S_AT, 229885_AT, 209211_AT, 208445_S_AT, 235841_AT, 1556527_A_AT, 217550_AT, 209360_S_AT, 214009_AT, 225452_AT, 207625_S_AT, 215022_X_AT, 231815_AT, 226066_AT, 201507_AT, 231188_AT, 202616_S_AT, 206194_AT, 223393_S_AT, 1555920_AT, 41113_AT, 201421_S_AT, 211874_S_AT, 206593_S_AT, 238547_…	2970	1512	12983	1.22584	0.000910868	5.36035e-05	0.000855534
GO:0033554~cellular response to stress	181	4.0062	7.10819e-07	34689_AT, 203103_S_AT, 207727_S_AT, 41858_AT, 202492_AT, 217618_X_AT, 203046_S_AT, 228190_AT, 204531_S_AT, 213007_AT, 227678_AT, 218851_S_AT, 1563621_AT, 209902_AT, 208445_S_AT, 215501_S_AT, 238279_X_AT, 209275_S_AT, 217550_AT, 209017_S_AT, 1559942_AT, 213109_AT, 202512_S_AT, 202809_S_AT, 222889_AT, 205415_S_AT, 203686_AT, 210216_X_AT, 211936_AT, 205841_AT, 202276_AT, 231769_AT, 48825_AT, 211297_…	3121	566	13528	1.38612	0.00338132	0.000116788	0.00134586
GO:0033365~protein localization in organelle	61	1.35015	8.27448e-07	234304_S_AT, 207438_S_AT, 240168_AT, 218305_AT, 224218_S_AT, 234351_X_AT, 200993_AT, 202264_S_AT, 201821_S_AT, 228053_S_AT, 208633_S_AT, 212269_S_AT, 1557504_AT, 215222_X_AT, 209824_S_AT, 203491_S_AT, 1562031_AT, 218316_AT, 217473_X_AT, 203230_AT, 209225_X_AT, 223450_S_AT, 1557505_A_AT, 225036_AT, 226069_AT, 211762_S_AT, 207163_S_AT, 202056_AT, 229317_AT, 217507_AT, 1552625_A_AT, 230708_AT, 20205…	3121	146	13528	1.81099	0.00393503	0.000131418	0.00156669
GO:0006605~protein targeting	82	1.81496	8.6349e-07	234304_S_AT, 240168_AT, 1554638_AT, 234351_X_AT, 203972_S_AT, 200993_AT, 202264_S_AT, 201821_S_AT, 223056_S_AT, 208633_S_AT, 228190_AT, 1557504_AT, 202080_S_AT, 215222_X_AT, 209824_S_AT, 218316_AT, 229969_AT, 1557505_A_AT, 225036_AT, 226069_AT, 211762_S_AT, 37425_G_AT, 229317_AT, 1552625_A_AT, 202055_AT, 1556009_AT, 205841_AT, 203194_S_AT, 209862_S_AT, 232653_AT, 205090_S_AT, 218188_S_AT, 218357_…	3121	215	13528	1.65316	0.00410608	0.000132718	0.00163493
GO:0070271~protein complex biogenesis	164	3.62992	8.82943e-07	234304_S_AT, 240154_AT, 232483_AT, 200993_AT, 219166_AT, 1557504_AT, 229885_AT, 217721_AT, 203230_AT, 218073_S_AT, 209017_S_AT, 201890_AT, 225452_AT, 224813_AT, 203327_AT, 244052_AT, 225742_AT, 203194_S_AT, 223818_S_AT, 237377_AT, 203579_S_AT, 209191_AT, 233588_X_AT, 211297_S_AT, 224631_AT, 1569346_A_AT, 222616_S_AT, 1559052_S_AT, 219006_AT, 210250_X_AT, 206804_AT, 203546_AT, 221916_AT, 211955_AT…	3121	505	13528	1.40764	0.00419839	0.000131467	0.00167176
GO:0006461~protein complex assembly	164	3.62992	8.82943e-07	234304_S_AT, 240154_AT, 232483_AT, 200993_AT, 219166_AT, 1557504_AT, 229885_AT, 217721_AT, 203230_AT, 218073_S_AT, 209017_S_AT, 201890_AT, 225452_AT, 224813_AT, 203327_AT, 244052_AT, 225742_AT, 203194_S_AT, 223818_S_AT, 237377_AT, 203579_S_AT, 209191_AT, 233588_X_AT, 211297_S_AT, 224631_AT, 1569346_A_AT, 222616_S_AT, 1559052_S_AT, 219006_AT, 210250_X_AT, 206804_AT, 203546_AT, 221916_AT, 211955_AT…	3121	505	13528	1.40764	0.00419839	0.000131467	0.00167176
GO:0006281~DNA repair	102	2.25764	9.95561e-07	34689_AT, 229141_AT, 203103_S_AT, 207727_S_AT, 223275_AT, 217618_X_AT, 204531_S_AT, 213007_AT, 214526_X_AT, 227678_AT, 218851_S_AT, 209902_AT, 1563621_AT, 216111_X_AT, 222713_S_AT, 219380_X_AT, 209257_S_AT, 210257_X_AT, 201291_S_AT, 202809_S_AT, 203686_AT, 222889_AT, 222806_S_AT, 205415_S_AT, 210947_S_AT, 222807_AT, 210216_X_AT, 205811_AT, 202276_AT, 231769_AT, 221135_S_AT, 1556988_S_AT, 226536_A…	3121	284	13528	1.55676	0.00473261	0.000143743	0.00188499
GO:0048193~Golgi vesicle transport	56	1.23949	1.04934e-06	204812_AT, 223033_S_AT, 201543_S_AT, 218354_AT, 1570151_AT, 213271_S_AT, 228418_AT, 205248_AT, 213267_AT, 203511_S_AT, 202106_AT, 212417_AT, 225926_AT, 218763_AT, 203350_AT, 213296_AT, 223445_AT, 218143_S_AT, 214544_S_AT, 207707_S_AT, 223450_S_AT, 224921_AT, 217749_AT, 201583_S_AT, 227987_AT, 239851_AT, 201658_AT, 201657_AT, 204720_S_AT, 1560434_X_AT, 217959_S_AT, 210048_AT, 228244_AT, 227988_S_A…	3121	131	13528	1.85292	0.00498765	0.000147052	0.00198682
GO:0016881~acid-amino acid ligase activity	77	1.70429	1.11321e-06	203103_S_AT, 219433_AT, 220018_AT, 217317_S_AT, 223566_S_AT, 211034_S_AT, 223802_S_AT, 205558_AT, 216251_S_AT, 204531_S_AT, 239651_AT, 223651_X_AT, 217817_AT, 227264_AT, 206183_S_AT, 225591_AT, 244633_AT, 1566507_A_AT, 1559094_AT, 220237_AT, 227293_AT, 223915_AT, 200739_S_AT, 1558418_AT, 239988_AT, 1558088_A_AT, 227625_S_AT, 231769_AT, 207231_AT, 229010_AT, 242829_X_AT, 223255_AT, 232020_AT, 2018…	2970	201	12983	1.67461	0.00201289	0.000111934	0.00189164
GO:0031966~mitochondrial membrane	124	2.74458	1.18864e-06	228940_AT, 221550_AT, 219680_AT, 203606_AT, 1559691_AT, 223320_S_AT, 217317_S_AT, 203551_S_AT, 211207_S_AT, 223354_X_AT, 213279_AT, 215966_X_AT, 225424_AT, 202264_S_AT, 203115_AT, 201821_S_AT, 223191_AT, 1554152_A_AT, 217772_S_AT, 223808_S_AT, 218316_AT, 209605_AT, 210007_S_AT, 213257_AT, 235747_AT, 244373_AT, 208369_S_AT, 204227_S_AT, 222132_S_AT, 225036_AT, 242875_AT, 229025_S_AT, 200708_AT, 21…	2699	394	12782	1.49046	0.000894648	2.63246e-05	0.00181004
GO:0006355~regulation of transcription, DNA-dependent	489	10.8234	1.49324e-06	212544_AT, 204849_AT, 212385_AT, 206036_S_AT, 221656_S_AT, 232483_AT, 223566_S_AT, 1555760_A_AT, 229700_AT, 237456_AT, 236562_AT, 204531_S_AT, 202080_S_AT, 228917_AT, 229885_AT, 209211_AT, 235841_AT, 220019_S_AT, 1556527_A_AT, 217550_AT, 209360_S_AT, 226605_AT, 1559942_AT, 207625_S_AT, 225452_AT, 1554770_X_AT, 215022_X_AT, 229794_AT, 226066_AT, 231815_AT, 231188_AT, 219711_AT, 202616_S_AT, 206194…	3121	1773	13528	1.19547	0.00709002	0.000203273	0.00282728
GO:0000278~mitotic cell cycle	125	2.76671	2.23887e-06	228423_AT, 230219_AT, 229267_AT, 1556227_AT, 225214_AT, 225521_AT, 203046_S_AT, 204159_AT, 211089_S_AT, 242352_AT, 239651_AT, 209194_AT, 225030_AT, 202284_S_AT, 217721_AT, 1565823_AT, 223651_X_AT, 217878_S_AT, 201663_S_AT, 201067_AT, 209257_S_AT, 203078_AT, 211762_S_AT, 1554747_A_AT, 213328_AT, 218524_AT, 224848_AT, 226517_AT, 201199_S_AT, 210716_S_AT, 213984_AT, 225276_AT, 1556646_AT, 214322_AT,…	3121	370	13528	1.46436	0.0106115	0.000296296	0.00423903
GO:0006403~RNA localization	45	0.996016	2.775e-06	212316_AT, 222040_AT, 240168_AT, 212384_AT, 202153_S_AT, 34868_AT, 241938_AT, 242712_X_AT, 32811_AT, 222523_AT, 225348_AT, 210092_AT, 202622_S_AT, 209520_S_AT, 204003_S_AT, 218073_S_AT, 1557360_AT, 230194_AT, 227117_AT, 230274_S_AT, 244766_AT, 224623_AT, 228902_AT, 238108_AT, 236149_AT, 210093_S_AT, 226561_AT, 203194_S_AT, 226922_AT, 228709_AT, 204064_AT, 218482_AT, 218295_S_AT, 212832_S_AT, 2187…	3121	100	13528	1.95053	0.0131359	0.000357312	0.0052541
GO:0051236~establishment of RNA localization	44	0.973882	2.82453e-06	212316_AT, 222040_AT, 240168_AT, 212384_AT, 202153_S_AT, 34868_AT, 241938_AT, 242712_X_AT, 32811_AT, 222523_AT, 225348_AT, 210092_AT, 202622_S_AT, 209520_S_AT, 204003_S_AT, 218073_S_AT, 1557360_AT, 230194_AT, 227117_AT, 230274_S_AT, 244766_AT, 224623_AT, 228902_AT, 238108_AT, 236149_AT, 210093_S_AT, 226561_AT, 203194_S_AT, 226922_AT, 204064_AT, 228709_AT, 218482_AT, 218295_S_AT, 212832_S_AT, 2187…	3121	97	13528	1.96617	0.0133687	0.000354118	0.00534786
GO:0050657~nucleic acid transport	44	0.973882	2.82453e-06	212316_AT, 222040_AT, 240168_AT, 212384_AT, 202153_S_AT, 34868_AT, 241938_AT, 242712_X_AT, 32811_AT, 222523_AT, 225348_AT, 210092_AT, 202622_S_AT, 209520_S_AT, 204003_S_AT, 218073_S_AT, 1557360_AT, 230194_AT, 227117_AT, 230274_S_AT, 244766_AT, 224623_AT, 228902_AT, 238108_AT, 236149_AT, 210093_S_AT, 226561_AT, 203194_S_AT, 226922_AT, 204064_AT, 228709_AT, 218482_AT, 218295_S_AT, 212832_S_AT, 2187…	3121	97	13528	1.96617	0.0133687	0.000354118	0.00534786
GO:0050658~RNA transport	44	0.973882	2.82453e-06	212316_AT, 222040_AT, 240168_AT, 212384_AT, 202153_S_AT, 34868_AT, 241938_AT, 242712_X_AT, 32811_AT, 222523_AT, 225348_AT, 210092_AT, 202622_S_AT, 209520_S_AT, 204003_S_AT, 218073_S_AT, 1557360_AT, 230194_AT, 227117_AT, 230274_S_AT, 244766_AT, 224623_AT, 228902_AT, 238108_AT, 236149_AT, 210093_S_AT, 226561_AT, 203194_S_AT, 226922_AT, 204064_AT, 228709_AT, 218482_AT, 218295_S_AT, 212832_S_AT, 2187…	3121	97	13528	1.96617	0.0133687	0.000354118	0.00534786
GO:0016563~transcription activator activity	134	2.96591	4.12541e-06	236160_AT, 214108_AT, 210985_S_AT, 232483_AT, 243469_AT, 217804_S_AT, 230209_AT, 204531_S_AT, 236114_AT, 229885_AT, 232333_AT, 235841_AT, 225184_AT, 215605_AT, 213359_AT, 209360_S_AT, 217550_AT, 244633_AT, 204702_S_AT, 218259_AT, 225452_AT, 204108_AT, 226066_AT, 233268_S_AT, 239661_AT, 218524_AT, 238520_AT, 201421_S_AT, 211874_S_AT, 222771_S_AT, 200658_S_AT, 238711_S_AT, 1558418_AT, 201868_S_AT, …	2970	410	12983	1.4287	0.00743919	0.000392923	0.00700998
GO:0006412~translation	113	2.50111	4.14409e-06	243149_AT, 229841_AT, 201018_AT, 218366_X_AT, 222427_S_AT, 219217_AT, 225145_AT, 222734_AT, 218046_S_AT, 214805_AT, 221437_S_AT, 217919_S_AT, 224330_S_AT, 215190_AT, 243201_AT, 233027_AT, 224766_AT, 226556_AT, 217915_S_AT, 224873_S_AT, 238863_X_AT, 200962_AT, 218732_AT, 216823_AT, 225276_AT, 223154_AT, 205811_AT, 203777_S_AT, 226731_AT, 208625_S_AT, 223356_S_AT, 1563796_S_AT, 201026_AT, 236989_AT…	3121	331	13528	1.47976	0.0195529	0.000506195	0.00784618
GO:0003712~transcription cofactor activity	121	2.67818	4.3925e-06	219433_AT, 212385_AT, 236160_AT, 214108_AT, 210985_S_AT, 223566_S_AT, 232483_AT, 226862_AT, 204270_AT, 214179_S_AT, 208740_AT, 237456_AT, 204531_S_AT, 232333_AT, 235841_AT, 216197_AT, 225184_AT, 215605_AT, 217550_AT, 238940_AT, 207625_S_AT, 244633_AT, 218259_AT, 225452_AT, 204702_S_AT, 218524_AT, 238520_AT, 210172_AT, 202616_S_AT, 223915_AT, 201421_S_AT, 222771_S_AT, 1558418_AT, 201868_S_AT, 2090…	2970	363	12983	1.45713	0.00791892	0.000397443	0.00746381
