# Supplementary material for: Comparison of Blood RNA Extraction Methods Used for Gene Expression Profiling in Amyotrophic Lateral Sclerosis
Source: PLoS One. 2014 Jan 27;9(1):e87508. doi: 10.1371/journal.pone.0087508 (PMC3903649; doi:10.1371/journal.pone.0087508)
Supplement: Table S2 — List of statistically significant (pLikeValue <0.05) differentially regulated genes after PUMA analysis of LL samples (3047; FC, fold change). (XLSX) [file pone.0087508.s002.xlsx]

## Sheet: S2 LL reg genes
Probe Set ID	FC	pLikeValue	Gene Symbol	Entrez Gene
231623_at	2.10253	0	TMEM174	134288
241642_x_at	0.163365	0	TLK1	9874
237495_at	0.31914	2.22045e-16	MPP7	143098
203724_s_at	0.242568	3.33067e-16	RUFY3	22902
244875_at	2.33175	4.28546e-14	ASMTL-AS	80161
242918_at	0.177256	1.18572e-13	NASP	4678
243830_at	0.264498	2.30116e-12
237317_at	0.221243	2.57139e-12
231450_at	0.32925	2.82618e-12
242018_at	0.398992	3.62688e-12
235316_at	1.94645	8.83338e-12	NAT8L	339983
224024_at	0.385413	1.92921e-11	ERGIC1	57222
244513_at	0.301431	2.03574e-11	TMEM161B	153396
217572_at	2.32309	3.09195e-11
227958_s_at	1.52524	4.1126e-11	GSN	2934
207321_s_at	0.769202	8.4751e-11	ABCB9	23457
202768_at	3.81641	1.09976e-10	FOSB	2354
240498_at	0.304142	1.89102e-10
240455_at	2.24056	2.50337e-10
208425_s_at	0.237896	2.86953e-10	TANC2	26115
1554296_at	1.46404	9.25359e-10	CYP19A1	1588
232813_s_at	2.04153	1.85779e-09	GOLGA6A /// GOLGA6B /// GOLGA6D	342096 /// 55889 /// 653643
1562853_x_at	1.78302	3.06896e-09
221138_s_at	0.444182	6.1113e-09
221496_s_at	0.352244	8.15199e-09	TOB2	10766
243807_at	0.432802	8.94106e-09	NCOA7	135112
211700_s_at	1.93371	1.4218e-08	TRO	7216
1562651_at	2.16197	1.53183e-08	ZSCAN1	284312
224282_s_at	0.369371	1.56487e-08	AGPAT3	56894
222364_at	0.54702	1.59773e-08	SLC44A1	23446
209013_x_at	0.336455	1.84209e-08	TRIO	7204
200835_s_at	0.379682	2.09188e-08	MAP4	4134
216433_s_at	0.348206	2.11386e-08	PRDM2	7799
1563224_at	1.78664	2.34147e-08
242778_at	0.573691	2.39262e-08	LPXN	9404
238753_at	0.451454	2.4055e-08	NCS1	23413
244208_at	0.542753	2.42232e-08
237750_at	0.454947	2.83082e-08	XPNPEP3	63929
217676_at	0.435012	3.32168e-08
223937_at	0.307498	3.40775e-08	FOXP1	27086
239458_at	0.320912	3.63617e-08	ALS2CR12	130540
216598_s_at	2.55672	4.16134e-08	CCL2	6347
244473_at	0.360169	5.79317e-08
1560897_a_at	2.16254	5.94806e-08	KRTAP10-11	386678
237369_at	0.432185	5.96278e-08
1569009_s_at	0.62577	6.8486e-08
239201_at	2.24776	1.0084e-07	CDK15	65061
209189_at	2.80474	1.20147e-07	FOS	2353
234628_at	0.621385	1.39674e-07
239957_at	0.365085	1.49627e-07
217248_s_at	0.513552	1.66954e-07	SLC7A8	23428
202549_at	0.293631	1.75245e-07	VAPB	9217
1566935_at	0.599356	1.81613e-07	TYRO3P	7302
201793_x_at	0.427567	1.81815e-07	SMG7	9887
1566889_at	0.511058	2.01466e-07	THADA	63892
211363_s_at	0.372015	2.28823e-07	MTAP	4507
241997_at	0.448237	2.33426e-07
221233_s_at	0.382089	2.47178e-07	FAM135A	57579
218876_at	0.389539	2.70016e-07	TPPP3	51673
229427_at	0.523108	2.83237e-07	SEMA5A	9037
205046_at	2.54584	3.18508e-07	CENPE	1062
205556_at	1.79184	3.56866e-07	MSX2	4488
217282_at	0.399238	3.73536e-07	MAN1A2	10905
241588_at	0.474113	4.13686e-07
227404_s_at	5.46935	4.95792e-07	EGR1	1958
1563975_at	0.379574	6.08599e-07	RNF130	55819
226988_s_at	1.7479	6.63669e-07	MYH14	79784
243332_at	0.465523	6.81903e-07
242672_at	0.461339	7.48641e-07
214637_at	2.57464	8.20442e-07	OSM	5008
1552882_a_at	1.86428	9.78812e-07	FAM123B	139285
235777_at	0.631428	1.0474e-06	ANKRD44	91526
233821_at	0.411622	1.13739e-06
244230_at	0.515021	1.1788e-06
211451_s_at	0.854456	1.20142e-06	KCNJ4	3761
1569307_s_at	0.390484	1.23968e-06
238281_at	0.359908	1.25625e-06
236650_at	0.379478	1.25827e-06
201702_s_at	0.337162	1.53788e-06	PPP1R10	5514
215282_at	0.474957	1.58514e-06	ANAPC13	25847
233957_at	0.35821	1.59562e-06
1554512_a_at	0.420122	1.62832e-06	CCDC123	84902
236799_at	0.617318	1.74965e-06
217856_at	0.633517	1.80175e-06	RBM8A	9939
1565527_x_at	0.539975	1.80331e-06	TCP11L2	255394
1570264_at	0.428433	2.15237e-06
201262_s_at	1.81017	2.67423e-06	BGN	633
241616_at	0.397317	2.75944e-06
236414_at	0.507638	2.77815e-06
207865_s_at	1.89658	2.78375e-06	BMP8B	656
226637_at	1.99023	3.0925e-06
244603_at	0.369372	3.10503e-06
240965_at	0.471305	3.14326e-06
207458_at	0.588852	3.14354e-06	C8orf51	78998
228261_at	0.567577	3.33472e-06	MIB2	142678
1557704_a_at	0.466371	3.64949e-06	MAR7	64844
236962_at	0.227305	4.39215e-06
1565867_a_at	0.398482	4.42653e-06	ZC3H11A	9877
234446_at	0.499987	4.63198e-06
240845_at	0.325857	4.7583e-06
1562903_at	1.76872	4.8407e-06	FLJ10661	286042
33148_at	0.278559	4.98042e-06	ZFR	51663
241866_at	0.491767	5.04024e-06	SLC16A7	9194
236005_at	0.459522	5.25377e-06
241753_at	1.85738	5.28142e-06
239742_at	0.512916	5.46193e-06	TULP4	56995
237577_at	0.413155	5.83668e-06	PCNP	57092
201694_s_at	4.10854	6.57888e-06	EGR1	1958
244772_at	0.448419	6.65846e-06
232386_at	0.363099	7.0552e-06	VPS13C	54832
1562794_at	1.79842	7.20594e-06
212095_s_at	0.417911	7.55472e-06	MTUS1	57509
237813_at	0.448329	7.62252e-06	PCBP2	5094
216315_x_at	0.562823	7.79622e-06	TMEM189-UBE2V1 /// UBE2V1	387522 /// 7335
243662_at	0.529115	7.80681e-06
207346_at	0.438878	7.81283e-06	STX2	2054
240636_at	0.408928	7.98849e-06
1561058_at	0.261753	8.07161e-06
244696_at	0.507223	8.16455e-06
230607_at	0.452437	8.21527e-06
1564107_at	0.513735	8.59878e-06
232890_at	0.574736	8.72202e-06
202448_s_at	1.62708	8.80586e-06	ZER1	10444
211709_s_at	0.503572	8.85875e-06	CLEC11A	6320
1555463_a_at	0.51748	9.79019e-06	CHD6	84181
230625_s_at	1.43485	9.83101e-06	TSPAN12	23554
239309_at	0.625254	9.89203e-06	DLX6	1750
1559949_at	0.366342	1.03391e-05
243300_at	0.475593	1.08175e-05
244622_at	0.446779	1.11254e-05	BRWD1	54014
231222_at	2.20582	1.12368e-05
243295_at	0.565324	1.15325e-05	RBM27	54439
237725_x_at	0.566019	1.15849e-05	SMC5	23137
1562442_a_at	0.564073	1.16684e-05	SSBP1	6742
205249_at	5.62435	1.17049e-05	EGR2	1959
1558871_at	0.530214	1.172e-05
233226_at	0.61801	1.23673e-05	PTPN9	5780
213286_at	0.313942	1.25435e-05	ZFR	51663
239008_at	0.483796	1.33383e-05	NCRNA00182	100302692
238833_at	0.603939	1.34693e-05	LOC729088	729088
202081_at	1.57587	1.46943e-05	IER2	9592
1563259_at	0.62755	1.52451e-05
228907_at	0.496489	1.60551e-05	LOC100507110	100507110
241226_at	0.616922	1.64674e-05
242408_at	0.409226	1.73555e-05	STYX	6815
210743_s_at	0.640682	1.77553e-05	CDC14A	8556
240141_at	0.441722	1.84447e-05
202476_s_at	0.518555	1.85584e-05	TUBGCP2	10844
241304_at	0.460218	1.85769e-05	PIK3C3	5289
243587_x_at	0.536931	1.89589e-05
217702_at	1.79608	1.9267e-05	IL27RA	9466
204748_at	2.0002	2.08383e-05	PTGS2	5743
1565546_at	0.493363	2.13105e-05	RNF141	50862
204184_s_at	0.639072	2.21363e-05	ADRBK2	157
224475_at	1.81768	2.24199e-05
236862_at	0.478208	2.30112e-05	GOPC	57120
208297_s_at	0.329403	2.36462e-05	EVI5	7813
206468_s_at	1.65719	2.36742e-05	METTL13	51603
213695_at	0.70715	2.36867e-05	PON3	5446
230586_s_at	1.80668	2.40542e-05	ZNF703	80139
235537_at	0.40562	2.42012e-05	OCIAD1	54940
1554867_a_at	1.74531	2.45529e-05	PRR16	51334
228097_at	1.45702	2.48164e-05	MYLIP	29116
243090_at	0.534713	2.67424e-05
237999_at	0.381465	2.72074e-05
205947_s_at	1.56723	2.74051e-05	VIPR2	7434
236808_at	0.602981	2.75196e-05	FGFR1OP2	26127
232044_at	1.30376	2.75339e-05	RBBP6	5930
233007_at	0.552352	2.75566e-05
233262_at	0.518766	2.86502e-05
210693_at	0.622545	2.91251e-05	SPPL2B	56928
1554730_at	0.690197	2.92895e-05	MCTP1	79772
235150_at	0.30814	3.11864e-05
242187_s_at	2.00031	3.25435e-05	TNRC18	84629
242163_at	0.381271	3.34742e-05	THRAP3	9967
237061_at	0.606908	3.37272e-05	ZNF347	84671
1560486_at	0.583282	3.47408e-05	STXBP3	6814
1561015_at	0.289273	3.52489e-05
239486_at	0.518873	3.72487e-05
231495_at	0.501393	3.73359e-05
230375_at	0.586473	3.7381e-05	SFRS18	25957
219948_x_at	0.544484	3.77519e-05	UGT2A3	79799
208664_s_at	0.547165	3.9665e-05	TTC3	7267
227281_at	1.32608	4.08627e-05	SLC29A4	222962
244568_at	0.551972	4.12132e-05
240350_at	1.72021	4.14862e-05
212650_at	0.426074	4.21063e-05	EHBP1	23301
238464_at	0.64938	4.22163e-05	LOC100510377	100510377
205648_at	1.73009	4.23236e-05	WNT2	7472
243341_at	0.3899	4.2977e-05
217656_at	0.615594	4.31704e-05	SMARCA4	6597
223564_s_at	1.5588	4.33848e-05	GNB1L	54584
234489_at	0.492822	4.38638e-05
1565358_at	0.639744	4.67344e-05	RARA	5914
212225_at	1.94769	4.6979e-05	EIF1	10209
1557278_s_at	0.522012	4.85652e-05	TNPO1	3842
244508_at	0.349063	4.89392e-05	SEP7	989
227841_at	1.9406	5.00268e-05	AMDHD2	51005
234996_at	1.63341	5.02762e-05	CALCRL	10203
243528_at	0.455339	5.13414e-05
1568830_at	0.633291	5.20631e-05	IRAK3	11213
238665_at	1.46237	5.26089e-05	ZNF865	100133142
210040_at	0.629045	5.2856e-05	SLC12A5	57468
231260_at	0.569291	5.39811e-05	LOC386758	386758
1562793_at	1.70837	5.45396e-05
228985_at	0.325286	5.6211e-05
1553663_a_at	0.633741	5.62828e-05	NPB	256933
243552_at	0.644514	5.77622e-05	MBTD1	54799
227398_s_at	0.729921	5.82233e-05
234131_at	0.332503	5.84226e-05
240176_at	0.540629	6.19297e-05
235730_at	0.508119	6.21969e-05
1554910_at	0.651971	6.25736e-05	PRKD3	23683
239504_at	0.548152	6.3097e-05
239833_at	0.609735	6.31024e-05
203945_at	1.52085	6.32878e-05	ARG2	384
243987_at	0.572674	6.35189e-05
222286_at	0.745342	6.49782e-05	SNAPC3	6619
37965_at	1.9462	6.54216e-05	PARVB	29780
202821_s_at	0.552894	6.59757e-05	LPP	4026
229378_at	0.526906	6.64469e-05	STOX1	219736
243325_at	0.354927	6.75467e-05	GSTK1	373156
1558775_s_at	0.598537	6.88791e-05	NSMAF	8439
243525_at	0.632844	6.89221e-05
220836_at	0.597857	7.03624e-05	ZNF407	55628
243089_at	0.52321	7.25123e-05
216527_at	0.544825	7.35968e-05
243141_at	0.412731	7.67477e-05	SGMS2	166929
1555384_a_at	0.478679	7.97324e-05	LARP4	113251
238915_at	0.477015	8.28478e-05
220905_at	0.614433	8.32199e-05
237046_x_at	1.51808	8.39085e-05	IL34	146433
222565_s_at	0.646665	8.48084e-05	PRKD3	23683
240448_at	1.54961	8.52884e-05	KIAA0802	23255
201236_s_at	1.63191	8.66195e-05	BTG2	7832
37170_at	0.582777	8.6786e-05	BMP2K	55589
240089_at	0.522206	8.86075e-05
204049_s_at	0.755079	9.1781e-05	PHACTR2	9749
1560599_a_at	0.491058	9.72166e-05	CCDC123	84902
212106_at	0.567323	9.79658e-05	FAF2	23197
1553717_at	0.390162	0.000105585	KCTD7	154881
217061_s_at	0.594736	0.000109248	ETV1	2115
204470_at	1.72133	0.000109625	CXCL1	2919
210909_x_at	1.7829	0.00011015	LPAL2	80350
240848_at	0.524321	0.000114737
216101_at	0.508531	0.000114874
217620_s_at	0.586076	0.000117193	PIK3CB	5291
239830_at	0.669312	0.000117615
228337_at	0.753658	0.000122689	PWWP2A	114825
242347_at	0.59312	0.000128741
1555874_x_at	0.515857	0.000129296	MGC21881	389741
233632_s_at	1.27912	0.000129909	XRN1	54464
236850_at	0.559903	0.00013125	CAPRIN1	4076
235972_at	0.562016	0.000132938	TMEM131	23505
241184_x_at	0.454769	0.000134744
216072_at	0.517119	0.000137036
232517_s_at	1.51608	0.000137235	PRIC285	85441
236041_at	0.663247	0.000139335
208328_s_at	0.634569	0.000140216	MEF2A	4205
231307_at	0.625517	0.000142099
243997_x_at	0.443378	0.000143114
239032_at	0.585283	0.000143189
241767_at	0.684399	0.000143673
1556226_at	0.643906	0.000145805
1564308_a_at	0.686886	0.000149584	MPP7	143098
242732_at	0.452688	0.000149941
243458_at	0.462407	0.000151664
243072_at	0.534667	0.000156095
227884_at	0.578206	0.000157318	TAF15	8148
207076_s_at	0.634265	0.000158677	ASS1	445
242429_at	0.623335	0.000159402	ZNF567	163081
1559044_at	0.656595	0.000159557	EXOSC1	51013
243908_at	0.626378	0.000161263
227101_at	0.527493	0.000163278	ZNF800	168850
204909_at	0.546434	0.000163483	DDX6	1656
233063_s_at	0.747094	0.000163537
1562110_at	0.40538	0.000166056
216622_at	1.48695	0.000167161	LAMB4	22798
1566544_at	0.583323	0.000167412
1553909_x_at	0.434332	0.000169366	FAM178A	55719
243866_x_at	0.550967	0.000170613
243127_x_at	0.558854	0.00017298	DNASE1	1773
237409_at	0.585413	0.000172987
223068_at	1.36016	0.000174949	EML4	27436
238716_at	0.42592	0.000176855	FAM85A	619423
228256_s_at	2.37783	0.00017938	EPB41L4A	64097
1558449_at	0.513045	0.000180067
1559515_at	0.378761	0.000180261
201292_at	2.02697	0.000181105	TOP2A	7153
1554997_a_at	1.94474	0.000184127	PTGS2	5743
201577_at	1.42539	0.000184451	NME1	4830
219456_s_at	1.59854	0.000187398	RIN3	79890
1553047_at	0.593669	0.000197699	PIP4K2B	8396
239129_at	0.673971	0.000198556
216617_s_at	0.65125	0.000199353	MAG	4099
229609_at	0.585609	0.000200495	LOC728190	728190
241060_x_at	0.513549	0.000203326
237860_at	1.54623	0.000203954
241004_at	0.414487	0.000210245
234951_s_at	0.613247	0.000218873	COL12A1	1303
229586_at	0.707404	0.000221509	CHD9	80205
242024_at	0.54907	0.000222653
241871_at	0.652504	0.0002239	CAMK4	814
232945_at	0.628245	0.000223915	PUS10	150962
38043_at	0.660438	0.000229562	FAM3A	60343
215678_at	1.70607	0.000231049
243361_at	0.554973	0.000233878	SREK1	140890
1569476_at	0.573246	0.000234431	DKFZP434L187	26082
220215_at	0.700338	0.00023468	ZNF669	79862
228686_at	0.565036	0.000241719	FLJ33630	644873
240060_at	0.561874	0.000245595
1559035_a_at	0.323539	0.000246006
225160_x_at	1.55604	0.000251429	MDM2	4193
1563507_at	0.629997	0.000254027
216661_x_at	1.54761	0.000255071	CYP2C9	1559
233191_at	1.2648	0.000257153	RUFY2	55680
1566515_at	0.582979	0.00026137	CWF19L2	143884
1560552_a_at	0.470508	0.000261552
242332_at	0.606503	0.000262423	LOC400550	400550
234676_s_at	0.633521	0.000270832	N6AMT1	29104
242248_at	0.543611	0.00027325	PHKB	5257
224546_at	0.587756	0.000278205
1561763_at	0.518091	0.000280487
202241_at	1.47147	0.00028104	TRIB1	10221
208178_x_at	0.488764	0.000281079	TRIO	7204
1566171_at	0.531177	0.000297021	RFFL	117584
1562898_at	0.688442	0.00029836
230397_at	0.441954	0.000299968	SAR1B	51128
209715_at	0.52952	0.00030071	CBX5	23468
243648_at	0.445455	0.000303213	ZBED6	100381270
242523_at	0.722452	0.000305117
241750_x_at	0.564664	0.000305474
1557797_a_at	0.595734	0.000307239
239046_at	0.634019	0.000309562
201014_s_at	1.29594	0.00031574	PAICS	10606
232573_at	1.65709	0.000317191
224775_at	0.521529	0.000318136	IWS1	55677
224566_at	1.73901	0.000320557	NEAT1	283131
1559232_a_at	0.650823	0.000323202
235193_at	0.599948	0.00032926
1555145_at	0.691913	0.000331572	C1orf96	126731
201693_s_at	3.68224	0.000340837	EGR1	1958
238317_x_at	0.510622	0.00034352
1569760_at	0.687138	0.000348025
208392_x_at	1.40863	0.000351315	SP110	3431
231500_s_at	1.55007	0.000352878	BOLA2	552900
1562267_s_at	1.51056	0.000356558	ZNF709	163051
1555373_at	0.712774	0.000362773
240078_at	0.423418	0.000363172	SFSWAP	6433
244822_at	0.634821	0.000363178
240544_at	0.460098	0.000366463
210408_s_at	0.682298	0.000366542	CPNE6	9362
219803_at	1.47119	0.000367836	ANGPTL3	27329
204286_s_at	1.51976	0.000369408	PMAIP1	5366
219934_s_at	1.47978	0.000369824	SULT1E1	6783
1555439_at	0.561401	0.000373557	GTF3C3	9330
243559_at	0.564159	0.000374743
1563620_at	0.710479	0.000378528	BTRC	8945
244599_at	0.680228	0.000379786
230324_at	0.674397	0.000382937
232205_at	0.49829	0.000385509
241683_at	0.453762	0.000386664	HECTD1	25831
206115_at	1.78783	0.000388797	EGR3	1960
1554277_s_at	0.421198	0.000394472	FANCM	57697
209364_at	0.538374	0.000395731	BAD	572
219387_at	0.569273	0.000397762	CCDC88A	55704
223252_at	1.37914	0.000401396	HDGFRP2	84717
240015_at	0.720115	0.000414664	LOC439949	439949
238356_at	0.576885	0.000418602	DOCK11	139818
207262_at	0.724341	0.000419036	APOF	319
237286_at	0.582277	0.000420969	INTS9	55756
237716_at	0.659636	0.000425499
1566340_at	0.626575	0.000435107	SNORD8	319103
211360_s_at	0.290755	0.000437867	ITPR2	3709
1568866_at	0.622245	0.000445086
214187_x_at	1.59759	0.000445653	CTDSPL	10217
236002_at	0.731119	0.00044606
217208_s_at	0.566761	0.000448567	DLG1	1739
1555427_s_at	1.304	0.000449359	SYNCRIP	10492
241706_at	0.649256	0.000449466	CPNE8	144402
1557520_a_at	0.668252	0.000456256
225907_at	1.79925	0.000459506	LOC728743	728743
239596_at	0.591592	0.000459676	SLC30A7	148867
219711_at	1.31213	0.00046118	ZNF586	54807
226404_at	0.548022	0.000464151	RBM39	9584
232179_at	0.476807	0.000465291	LOC158863	158863
206933_s_at	0.775347	0.000465429	H6PD	9563
216555_at	0.497254	0.000466659	C22orf30	253143
235154_at	0.689962	0.000467439	TAF3	83860
240062_at	0.627612	0.000468265	FAM3C	10447
237726_at	1.46982	0.000468269
204450_x_at	0.530392	0.000469063	APOA1	335
204190_at	1.28301	0.00047036	USPL1	10208
241861_at	0.579118	0.000470361	SYCP3	50511
1552693_at	0.538868	0.000472575	ARL11	115761
242661_x_at	0.378588	0.000475141	ALS2CR12	130540
238677_at	0.722749	0.000475517	WDR36	134430
214569_at	0.660378	0.000483319	IFNA5	3442
239147_at	0.732227	0.000485111	ARSK	153642
1558990_at	0.504677	0.000488258	LOC100286921	100286921
205389_s_at	0.54341	0.000495282	ANK1	286
233263_at	0.557931	0.00049533
238940_at	0.485465	0.000503365	KLF12	11278
207332_s_at	1.28501	0.000507494	TFRC	7037
210251_s_at	0.743167	0.000517722	RUFY3	22902
211502_s_at	0.600905	0.000519539	CDK14	5218
205050_s_at	1.52909	0.000519724	MAPK8IP2	23542
241116_at	1.39152	0.000524044
1562270_at	1.4929	0.000535525	ARHGEF7	8874
229943_at	0.681719	0.000538518	TRIM13	10206
237118_at	0.520419	0.000540322
233031_at	0.6713	0.000554359	ZEB2	9839
230064_at	0.500359	0.000561827
238355_at	0.448532	0.000565036	RBM39	9584
237884_x_at	0.709427	0.000566198	TRPM7	54822
239601_at	0.664133	0.000567205
224254_x_at	0.663116	0.00057253
217602_at	0.575359	0.000580697	PPIA	5478
224549_x_at	0.641305	0.000582501
242916_at	0.666297	0.000584244	CEP110	11064
240548_at	0.605021	0.000585249
209996_x_at	0.304279	0.000586506	PCM1	5108
236728_at	0.701014	0.00058721	LNPEP	4012
201998_at	1.28225	0.00060366	ST6GAL1	6480
237603_at	0.690775	0.000608864	C1orf100	200159
221137_at	0.649391	0.000610823
1560020_at	0.362913	0.000613161	DNAJC13	23317
230876_at	0.561278	0.000613731	ZNF883	169834
1560112_at	0.655549	0.000620475	WDFY2	115825
1554513_s_at	0.525425	0.000621291	CCDC123	84902
240990_at	0.566764	0.000623261
230164_at	0.625433	0.000624014	ZNF621	285268
202528_at	0.56564	0.00062564	GALE	2582
216503_s_at	0.649586	0.000625723	MLLT10	8028
1555270_a_at	1.46622	0.000626458	WFS1	7466
243878_at	0.471398	0.000627331
240926_at	0.708329	0.000627435	LRCH3	84859
233819_s_at	0.416076	0.000629722	LTN1	26046
242279_at	0.614932	0.000635352
235864_at	0.636331	0.000636048	MPP5	64398
240866_at	0.557006	0.000637998
1561236_at	1.45893	0.000646511
235815_at	0.568469	0.000647955	TSHZ2	128553
1557529_at	0.683665	0.000653036	C12orf51	283450
241855_s_at	0.591649	0.000659765
223882_at	0.628721	0.000664853	FAM172A	83989
243054_at	0.719976	0.000664896
1560017_at	0.379114	0.00068038	TMTC3	160418
239385_at	0.541857	0.000685609	TFG	10342
232341_x_at	1.29677	0.000688299	HABP4	22927
214485_at	0.613741	0.00069195	ODF1	4956
243771_at	0.65088	0.000694457
242325_at	0.567398	0.000694736	YWHAH	7533
243509_at	1.68369	0.000695458
1566798_at	0.656437	0.000703767
205809_s_at	0.474999	0.000707299	WASL	8976
233346_at	0.688612	0.000708531
211442_x_at	1.53438	0.000712334	CYP3A43	64816
235765_at	0.442454	0.000715929	TLE4	7091
212277_at	1.2438	0.000721435	MTMR4	9110
230106_at	0.527293	0.000722462	ZXDC	79364
1555436_a_at	0.62622	0.000722466	AFF4	27125
238555_at	0.631483	0.000724355
1562094_at	0.627254	0.000725518
236659_x_at	0.571569	0.000748631
220849_at	1.62414	0.000758132	LOC79999	79999
201531_at	1.49392	0.0007608	ZFP36	7538
243739_at	0.479694	0.000765053
207165_at	1.69062	0.000767276	HMMR	3161
244011_at	0.700157	0.000779301	PPM1K	152926
222285_at	0.485687	0.000780305	IGHD	3495
206652_at	0.58291	0.000789905	ZMYM5	9205
228883_at	0.649302	0.000790791	TUB	7275
229061_s_at	0.760482	0.000796217	SLC25A13	10165
200898_s_at	1.28305	0.000799371	MGEA5	10724
1559589_a_at	0.576209	0.000800793
241240_at	0.567608	0.000806715
224170_s_at	0.603936	0.000814979	TULP4	56995
202170_s_at	0.77594	0.000815719	AASDHPPT	60496
212079_s_at	0.626921	0.000818443	MLL	4297
237548_at	0.661713	0.000830356
243815_at	0.652897	0.000832729	PGBD4	161779
224218_s_at	0.653431	0.00083717	TRPS1	7227
240442_at	0.528234	0.000842395
232342_at	0.553644	0.000852741	MTMR14	64419
1561073_at	0.479603	0.00085863
232236_at	0.588811	0.000866721
243644_at	0.674684	0.000867465
1562650_at	0.625691	0.000871201	FRYL	285527
238707_at	0.576869	0.000872576
228939_at	0.664028	0.000874681	OAF	220323
1563867_at	0.621205	0.000875768	LOC283194	283194
228478_at	0.73346	0.000884793
1556690_s_at	0.733535	0.000891682
243454_at	0.338238	0.000896285
1562716_at	1.54892	0.000904092	LOC284632	284632
203653_s_at	0.688084	0.000905099	COIL	8161
229086_at	0.670215	0.000911641	C1orf213	148898
240779_at	1.43586	0.000914598
240417_at	0.558736	0.00091733
1555117_at	0.650647	0.000921312
225634_at	1.37167	0.000931526	ZC3HAV1	56829
207636_at	0.596328	0.000935837	SERPINI2	5276
233087_at	0.70658	0.000936617	FBXL17	64839
212451_at	0.435516	0.000937297	SECISBP2L	9728
236603_at	0.700721	0.000942329
238925_at	0.611214	0.000956965	SNTB2	6645
1553107_s_at	0.682635	0.000962806	C5orf24	134553
238970_at	0.526718	0.000963067
218417_s_at	0.37982	0.000963094	SLC48A1	55652
232632_at	0.643435	0.000970112
213741_s_at	0.716387	0.000979977	KPNA1	3836
233816_at	0.453569	0.000980552
244395_at	0.588635	0.000998933	FLJ41455	441441
1557519_at	0.660154	0.00100029
204114_at	0.604317	0.00100393	NID2	22795
236390_at	0.62101	0.00100486	C20orf94	128710
241769_at	0.612237	0.00101971
201918_at	0.783332	0.00102216	SLC25A36	55186
208054_at	0.514744	0.00103308	HERC4	26091
218279_s_at	1.36926	0.00104018	HIST2H2AA3	8337
244291_x_at	0.762512	0.00104421
244733_at	0.688899	0.00104969
210405_x_at	1.60269	0.00105236	TNFRSF10B	8795
239992_at	0.638605	0.00105344
200917_s_at	0.262025	0.00106429	SRPR	6734
202579_x_at	1.3074	0.00106592	HMGN4	10473
214510_at	0.559718	0.00107178	GPR20	2843
237184_at	0.649219	0.00107877
203056_s_at	0.54664	0.0010862	PRDM2	7799
1565821_at	0.648262	0.00108893
240162_at	1.55473	0.00108954
1565614_at	0.409711	0.00109159
211947_s_at	0.477405	0.00111097	BAT2L2	23215
1563165_at	0.93953	0.00111517
1561615_s_at	0.383319	0.0011184	SLC8A1	6546
224227_s_at	0.246998	0.00112078	BDP1	55814
1552480_s_at	0.259947	0.00113096	PTPRC	5788
216069_at	0.38247	0.0011422
216022_at	0.570297	0.00114651
219976_at	0.726703	0.00114819	HOOK1	51361
239850_at	0.665922	0.00115819
240941_at	0.535446	0.0011625	ITSN2	50618
242712_x_at	0.598015	0.00116837	RANBP2 /// RGPD1 /// RGPD2 /// RGPD3 /// RGPD4 /// RGPD5 /// RGPD6 /// RGPD8	285190 /// 400966 /// 5903 /// 653489 /// 727851 /// 729540 /// 729857 /// 84220
224943_at	0.7279	0.00117293	BTBD7	55727
239795_at	0.588712	0.00118187
233715_at	0.672223	0.0011847
202773_s_at	0.585197	0.00118505	SFSWAP	6433
232929_at	0.612598	0.00118723
242258_at	0.698985	0.00120002
1568680_s_at	0.649292	0.00121641	YTHDC2	64848
210332_at	1.52959	0.00122312	ACHE	43
1562454_at	0.649706	0.00123485
232965_at	0.628704	0.00123925	LOC400684	400684
1564002_a_at	0.660396	0.00124103	AKD1	221264
207465_at	1.26513	0.00124133	LOC100127886	100127886
202439_s_at	0.692481	0.0012431	IDS	3423
1565839_a_at	0.662014	0.00124389
1558660_at	1.53937	0.00125601
236455_at	1.50816	0.00125875
225077_at	1.32956	0.00125995	CHD2	1106
1554376_s_at	0.682786	0.00126186	PTPLA	9200
240295_at	1.39269	0.00126514
235224_s_at	1.67391	0.00126561
1560281_a_at	0.630211	0.00126797	TMEM95	339168
201951_at	0.74034	0.00126826	ALCAM	214
214391_x_at	0.584638	0.00127062	PTGER1	5731
236139_at	0.555121	0.00127166
240309_at	0.63815	0.00128169
233468_at	0.319251	0.00128747
1564294_at	0.742325	0.00128776
1557452_at	0.609688	0.00129712
226090_x_at	0.739692	0.00130581	RABL3	285282
1553575_at	1.9013	0.00131153	ND6	4541
230970_at	0.579221	0.00131274
200951_s_at	0.542621	0.00132008	CCND2	894
241685_x_at	0.471516	0.00132134
223281_s_at	0.666362	0.00134164	COX15	1355
1561177_at	1.49439	0.00134248
212266_s_at	1.39012	0.00134709	SRSF5	6430
243250_at	0.616452	0.00135743	ZDHHC13	54503
244396_at	0.445423	0.00136347	G3BP1	10146
243381_at	0.448214	0.00136381
207284_s_at	0.538552	0.00136766	ASPH	444
243563_at	0.678538	0.00137619
215271_at	0.631999	0.0013779	TNN	63923
225436_at	1.63849	0.00138167	FAM108C1	58489
238279_x_at	0.691408	0.00139724
1554588_a_at	0.743572	0.00139786	TTC30B	150737
240262_at	0.510984	0.00140071
236354_at	0.707491	0.00140248
219844_at	0.35824	0.00140502	C10orf118	55088
238982_at	0.692168	0.00140681	DENR	8562
243375_at	0.634392	0.00141032
219918_s_at	2.11864	0.00141118	ASPM	259266
1562524_at	0.697545	0.00141657
1552643_at	0.502541	0.00141727	ZNF626	199777
1564510_at	0.689002	0.00142459
1559401_a_at	0.567206	0.00142839
1570382_at	0.674358	0.00143005
49306_at	0.62455	0.00143127	RASSF4	83937
1556493_a_at	0.5195	0.00143369	KDM4C	23081
212620_at	0.663849	0.00143663	ZNF609	23060
1569674_at	0.684471	0.00144712	BHLHB9	80823
242039_at	0.625035	0.00144965	ARAP1	116985
213534_s_at	1.38965	0.00145292	PASK	23178
240939_x_at	0.626668	0.0014547
202600_s_at	0.559897	0.00146512	NRIP1	8204
223999_at	0.477621	0.00146787	PPIL2	23759
242642_at	0.491641	0.00147181
1563502_at	0.650438	0.00147401	ZDHHC2	51201
235380_at	0.612993	0.00147529
227741_at	0.621077	0.00147535	PTPLB	201562
232724_at	0.668279	0.00147691	MS4A6A	64231
237803_x_at	0.640817	0.00147786
206500_s_at	0.464979	0.0014799	C14orf106	55320
236558_at	0.528946	0.00148372
201685_s_at	1.25556	0.00148383	TOX4	9878
219576_at	0.694502	0.00148763	MAP7D3	79649
204285_s_at	1.57926	0.00149016	PMAIP1	5366
214305_s_at	0.554536	0.0014911	SF3B1	23451
243008_at	0.606113	0.0014936
228431_at	0.586436	0.0014999	NFYA	4800
207367_at	1.51916	0.00150965	ATP12A	479
243545_at	0.632402	0.00151158
1560705_at	0.575628	0.00151824
1562634_at	0.667369	0.0015189
233636_at	0.624564	0.00152082	MIR17HG	407975
240302_at	0.657697	0.00152211
1561872_at	0.439951	0.00152628
242197_x_at	0.515345	0.00153082	CD36	948
240271_at	0.595849	0.00153857
202045_s_at	1.38871	0.00154084	GRLF1	2909
233405_at	0.583257	0.00155496
233309_at	0.596031	0.00157034
1565657_at	0.431296	0.00158021	CMTM6	54918
1569354_at	0.62191	0.00158854	NSUN6	221078
201464_x_at	1.70851	0.00159085	JUN	3725
1559496_at	0.564195	0.00159352	PPA2	27068
236762_at	1.5264	0.00160951	ATP9B	374868
1566897_at	0.63137	0.0016113
209774_x_at	1.6226	0.00162071	CXCL2	2920
236612_at	0.578247	0.00163083
214515_at	0.707211	0.00163601	OR1E1	8387
396_f_at	1.58698	0.00165491	EPOR	2057
232787_at	1.49729	0.00165647	PRIC285	85441
219234_x_at	0.697715	0.00165684	SCRN3	79634
242115_at	0.534562	0.00166137
220509_at	0.734699	0.00166417	RBM26	64062
221705_s_at	0.548688	0.00166957	SIKE1	80143
216063_at	1.46279	0.00167658	HBBP1	3044
203176_s_at	0.696508	0.0016769	TFAM	7019
204539_s_at	0.60905	0.0016848	CELSR1	9620
234013_at	1.40418	0.00168617	TRD@	6964
202272_s_at	1.26625	0.00168782	FBXO28	23219
1558931_at	0.741341	0.00168834	LRRC16A	55604
241590_at	0.510678	0.00170825
243630_at	0.726046	0.00170831	NDUFB1	4707
208278_s_at	0.548085	0.0017089
213430_at	0.727674	0.001712	RUFY3	22902
221985_at	0.667229	0.00172438	KLHL24	54800
226237_at	0.688847	0.00174037	COL8A1	1295
239212_at	0.743365	0.00174728	LTV1	84946
1562260_at	0.597532	0.00175561
221429_x_at	1.41974	0.0017558	TEX13A	56157
238563_at	0.553636	0.00175613
241995_at	0.634399	0.00176384	DGUOK	1716
238435_at	0.620433	0.00176918	LOC100506661	100506661
234757_at	0.676712	0.00177891	LOC100129884	100129884
233647_s_at	0.787451	0.00178661	CDADC1	81602
1557895_at	0.568839	0.00179508	FLJ35934	400579
1554460_at	0.64381	0.00180594	ST8SIA4	7903
229946_at	0.637843	0.00181711	FAM168B	130074
212759_s_at	0.606233	0.00182105	TCF7L2	6934
213298_at	0.639294	0.00182365	NFIC	4782
241790_at	0.672125	0.00183679
1557698_at	0.583531	0.00184148
216018_at	1.44348	0.00184175	RNF5	6048
222479_s_at	1.32972	0.00184251	DYNC1LI1	51143
234909_at	0.65363	0.00184435
1554036_at	1.61688	0.00184711	ZBTB24	9841
241537_at	1.30892	0.00186226
1553542_at	0.62919	0.00186243	CCDC125	202243
239778_x_at	0.65945	0.00186349
243473_at	0.556321	0.0018652
222236_s_at	1.31317	0.00186805	ASAP3	55616
236727_at	0.601772	0.0018686
214723_x_at	0.484838	0.00187001	ANKRD36	375248
242202_at	0.628059	0.00188146
240602_at	0.683738	0.00189864	HBS1L	10767
241409_at	1.45388	0.00191693
1555725_a_at	0.603938	0.00191766	RGS5	8490
233099_at	0.600007	0.00191972
237300_at	1.49594	0.00192189	PSMA3	5684
216303_s_at	1.41814	0.0019414	MTMR1	8776
1558392_at	0.506972	0.00194471	SYNE2	23224
228295_at	0.649574	0.00196562	WDR59	79726
237418_at	0.652852	0.00196891	CDK5RAP2	55755
236635_at	0.642237	0.00196892	ZNF667	63934
236409_at	0.435232	0.00196967
1565581_at	1.61581	0.00196969
1552902_a_at	1.52145	0.00197604	FOXP2	93986
201299_s_at	0.560226	0.00198126	MOBKL1B	55233
238831_at	0.567574	0.00198675	TMEM33	55161
221778_at	1.23386	0.00199242	JHDM1D	80853
237332_at	0.557512	0.0019936
235256_s_at	1.34356	0.00199406	GALM	130589
1558173_a_at	0.604508	0.00199626	LUZP1	7798
1560029_a_at	0.695424	0.00200331	C11orf57	55216
1569482_at	0.556331	0.00201023
218529_at	1.80015	0.00201028	CD320	51293
235180_at	0.516276	0.0020175	STYX	6815
227006_at	0.696802	0.00203086	PPP1R14A	94274
37953_s_at	1.43034	0.00203192	ACCN2	41
226583_at	1.20734	0.00203306	C12orf76	400073
220537_at	0.680888	0.00203361	MTMR8	55613
230439_at	1.51864	0.00203427	LOC389458	389458
234597_at	0.605777	0.00203795
243995_at	0.488498	0.00203804	PTAR1	375743
211440_x_at	1.49934	0.00204088	CYP3A43	64816
201070_x_at	0.558528	0.00204832	SF3B1	23451
214883_at	1.45739	0.00204908	THRA	7067
1567219_at	1.41149	0.00204992
240652_at	0.45727	0.00205298
243963_at	0.61393	0.00205959	SDCCAG8	10806
243584_at	1.31618	0.00206245
1557703_at	0.687415	0.00206667	MAR7	64844
209254_at	0.649487	0.00206897	KLHDC10	23008
1558527_at	0.633469	0.00208672	LOC100132707	100132707
1558592_at	0.602839	0.0021032
219364_at	2.15757	0.00210391	DHX58	79132
242722_at	0.560143	0.00212929	LMO7	4008
240326_at	0.590704	0.00213
1569181_x_at	0.654282	0.00213776
223028_s_at	0.690821	0.00215788	SNX9	51429
222001_x_at	1.29925	0.00216122	LOC728855	728855
1554822_at	0.637449	0.0021649	PHTF2	57157
226819_at	0.708453	0.00216506	LSM11	134353
223649_s_at	1.88887	0.00216832	SLC25A39	51629
213926_s_at	0.597854	0.0021818	AGFG1	3267
1554745_at	1.40618	0.00218203	RALGPS1	9649
206454_s_at	1.65379	0.00218936	RHO	6010
233415_at	0.477485	0.0021981
229115_at	0.571854	0.00220248	DYNC1H1	1778
1552669_at	1.56301	0.00220922	PPP1R3B	79660
210110_x_at	1.25642	0.00221058	HNRNPH3	3189
239107_at	0.578882	0.00222916	ZNF280D	54816
232021_at	0.711739	0.00222935	GXYLT1	283464
239162_at	0.584141	0.00223552	LOC100506897	100506897
1565436_s_at	0.525669	0.0022389	MLL	4297
242468_at	0.600746	0.0022416
242829_x_at	0.644678	0.00225049	FBXL3	26224
238687_x_at	0.46137	0.00225182	ZNF770	54989
233106_at	0.741095	0.00229589	C14orf82	145438
242894_at	0.692583	0.00231342
222100_at	1.59457	0.00232307	CYP2E1	1571
1563805_a_at	1.57109	0.00233102	FAM83C	128876
1567519_at	0.704371	0.00233141	PLXNA3	55558
206810_at	0.612653	0.00233599	ZNF44	51710
242252_at	0.704285	0.00233937
1559663_at	0.505501	0.00235377
240016_at	0.593303	0.00235571
238157_at	0.648891	0.00238017
1557354_at	0.62315	0.00241159	SOS1	6654
210588_x_at	1.24599	0.00244327	HNRNPH3	3189
1569270_at	1.4701	0.00245653	LOC100134368	100134368
221163_s_at	1.4945	0.00246021	MLXIPL	51085
241688_at	0.617389	0.00246635
1554873_at	0.556948	0.00248713	CSPP1	79848
213922_at	0.724269	0.00249062	TTBK2	146057
204776_at	1.44427	0.00251261	THBS4	7060
233831_at	0.608073	0.00251937	LOC100289465	100289465
1565562_at	0.698905	0.00254291	MAGIX	79917
235021_at	0.756024	0.00254911	KIAA2026	158358
207308_at	1.42451	0.00255138	SLCO1A2	6579
230609_at	0.672042	0.00255302	CLINT1	9685
202447_at	1.24271	0.00255745	DECR1	1666
243135_x_at	0.635785	0.00258987	LOC100287081	100287081
230533_at	0.771402	0.00259182	ZMYND8	23613
221734_at	0.605312	0.00261602	PRRC1	133619
235266_at	0.60693	0.0026163	ATAD2	29028
212529_at	0.679276	0.00262245	LSM12	124801
1555945_s_at	0.709956	0.0026267	FAM120A	23196
221903_s_at	1.31522	0.0026466	CYLD	1540
215698_at	0.642428	0.0026701	KDM5A	5927
1559928_at	1.44804	0.00267697	PAPPA	5069
242812_at	0.706472	0.00269285
1556348_at	0.512333	0.00269522	HEATR1	55127
208611_s_at	1.41319	0.00269944	SPTAN1	6709
229005_at	1.54553	0.00270874	MCTP2	55784
240336_at	2.01569	0.00270881	HBM	3042
243233_at	0.630073	0.00271766
1565131_x_at	0.669519	0.00272281	MAP3K2	10746
237068_at	0.679904	0.00272476
1570259_at	0.75872	0.00273741	LIMS1	3987
235575_at	0.523578	0.00273817
237741_at	0.583603	0.00274059	SLC25A36	55186
233118_at	0.711528	0.00274567
243513_at	0.68929	0.0027501
237464_at	0.749097	0.00276993
1569296_a_at	1.72419	0.00277756	LOC493754	493754
200671_s_at	0.55751	0.00278995	SPTBN1	6711
1552463_at	0.608708	0.00279554	SERPINB11	89778
241701_at	0.575487	0.00279559	ARHGAP21	57584
237554_at	0.537573	0.00280423
206919_at	0.704029	0.00280857	ELK4	2005
209136_s_at	0.613175	0.00280876	USP10	9100
224265_s_at	1.41931	0.00281671	ZAN	7455
239788_at	0.608598	0.00282469
217600_at	0.65188	0.00284092	SCUBE3	222663
241224_x_at	1.39873	0.00284316	DSCR8	84677
207478_at	0.722866	0.00291436
204840_s_at	0.514709	0.00292776	EEA1	8411
218967_s_at	0.748243	0.00293392	PTER	9317
242473_at	0.710981	0.00293421	TRAF4	9618
212804_s_at	0.702798	0.00294592	GAPVD1	26130
208629_s_at	0.74551	0.00296195	HADHA	3030
238505_at	1.28736	0.00296874	ADPRH	141
242645_at	0.693427	0.00300821
1552572_a_at	1.35175	0.00300902	MIPOL1	145282
210384_at	0.523671	0.00301334	PRMT2	3275
241922_at	0.735339	0.003022	LMO4	8543
202187_s_at	1.2667	0.00304225	PPP2R5A	5525
240659_x_at	0.660483	0.00304365
1570021_at	0.478668	0.00304667
243498_at	0.506115	0.00305247
1552912_a_at	0.463277	0.00306353	IL23R	149233
208118_x_at	1.25038	0.00306677	LOC100271836 /// LOC440354 /// LOC595101 /// LOC641298 /// SLC7A5P1 /// SLC7A5P2	100271836 /// 387254 /// 440354 /// 595101 /// 641298 /// 81893
210742_at	0.670928	0.00306755	CDC14A	8556
208042_at	0.667292	0.00307992	AGGF1	55109
240255_at	1.60138	0.00307993	LOC100507395	100507395
239614_x_at	0.704296	0.00309959
215376_at	0.665121	0.00310195
218810_at	1.47584	0.00310308	ZC3H12A	80149
206656_s_at	1.34332	0.00311208	C20orf3	57136
213945_s_at	1.39698	0.00311462
210938_at	0.738709	0.00312132	PDX1	3651
236696_at	0.566785	0.0031244	SR140	23350
229691_at	1.63416	0.00313014	ZBTB42	100128927
1553304_at	0.631569	0.00314469	LSM14B	149986
242906_at	0.613557	0.00314472
215319_at	1.39071	0.00314863	ATP8B3	148229
243319_at	0.617304	0.00317154
215188_at	0.501173	0.00318763	STK24	8428
235999_at	0.664462	0.00319171
244801_at	0.535002	0.00319841	PSMB7	5695
1558652_at	0.642421	0.00320304	KIAA1310	55683
201461_s_at	0.692256	0.00321126	MAPKAPK2	9261
217878_s_at	0.344778	0.00322859	CDC27	996
1559807_at	0.704642	0.0032391
1558688_at	0.695557	0.00325288	LOC441461	441461
205633_s_at	1.2959	0.00325301	ALAS1	211
211091_s_at	0.605931	0.00325409	NF2	4771
211094_s_at	0.552265	0.00326431	NF1	4763
1568592_at	1.29872	0.00327447	TRIM69	140691
226134_s_at	1.20281	0.00328517
243038_at	0.595225	0.00330245	RBM43	375287
1554101_a_at	0.63944	0.00332613	TMTC4	84899
207237_at	0.577889	0.0033855	KCNA3	3738
1555881_s_at	0.699232	0.00341083	LZTS2	84445
1557336_at	1.33736	0.00341908
211081_s_at	0.475589	0.00344196	MAP4K5	11183
219810_at	1.28842	0.00348457	VCPIP1	80124
215092_s_at	0.479011	0.00350904	NFAT5	10725
220336_s_at	0.667734	0.00351418	GP6	51206
237001_at	0.627312	0.00354432
216224_s_at	0.721017	0.0035564	HDAC6	10013
215316_at	0.694014	0.0035582
1555243_x_at	0.741122	0.00355953	C8orf59	401466
227514_at	0.703447	0.00358141	ITPRIPL2	162073
215996_at	0.624056	0.00364507
234998_at	1.22987	0.00365943	RAB11A	8766
243005_at	0.721529	0.00366283
238792_at	0.719513	0.00366568	PCNX	22990
209997_x_at	0.705825	0.00366725	PCM1	5108
224989_at	0.736573	0.00367288
231220_at	1.30568	0.00367862	CELF4	56853
1564287_at	0.647343	0.00369067	LOC144776	144776
238288_at	1.34292	0.00372012	LOC100508716	100508716
208364_at	0.703738	0.00372244	INPP4A	3631
1565862_a_at	1.46806	0.00372426
1569180_at	0.646433	0.00372852
244539_at	0.575925	0.00373543
215286_s_at	0.658672	0.00374023	PHTF2	57157
1556624_at	0.548676	0.00374161
212482_at	1.26523	0.00377402	RMND5A	64795
234973_at	1.67568	0.00381648	SLC38A5	92745
226942_at	1.24222	0.00382497	PHF20L1	51105
230212_at	0.701821	0.00382877	SPRY1	10252
229095_s_at	0.598325	0.00384568	LIMS3 /// LIMS3-LOC440895 /// LOC440895	100271835 /// 440895 /// 96626
213010_at	0.581522	0.00385568	PRKCDBP	112464
244021_at	0.70168	0.00387841
235645_at	0.415117	0.00388014	ESCO1	114799
208661_s_at	0.657175	0.00388666	TTC3	7267
236948_x_at	0.678131	0.0038896
204821_at	1.44643	0.00389734	BTN3A3	10384
230880_at	1.72872	0.00391034	KIAA1652	85367
205187_at	0.600519	0.00392045	SMAD5	4090
1566507_a_at	0.737891	0.00392417	FBXO9	26268
238811_at	0.651322	0.00392702	ATP11B	23200
242456_at	0.718179	0.00393385	MRE11A	4361
244133_at	0.694419	0.00393759	USP49	25862
213524_s_at	2.96369	0.00394155	G0S2	50486
237396_at	0.650274	0.00394599
233876_at	0.690215	0.00397707
1560330_at	0.66041	0.00399083	PCDH15	65217
242972_at	0.546996	0.00400363
210294_at	0.61009	0.00400718	TAPBP	6892
1553313_s_at	0.614008	0.00402036	SLC5A3	6526
40850_at	1.66408	0.00402137	FKBP8	23770
221875_x_at	1.27903	0.0040289	HLA-F	3134
1553447_at	1.35028	0.00402938	AGBL1	123624
205838_at	0.643872	0.00403421	GYPA	2993
239978_at	0.617189	0.00405931
220219_s_at	0.721633	0.00406348	LRRC37A /// LRRC37A2 /// LRRC37A3 /// LRRC37A4	374819 /// 474170 /// 55073 /// 9884
242402_x_at	0.695303	0.00406716	ARAP2	116984
243293_at	0.670578	0.00407948
204951_at	1.23656	0.00408277	RHOH	399
210348_at	1.4592	0.00410607	2004-09-01	5414
232288_at	0.676788	0.00411125	PDXDC1 /// PDXDC2P	23042 /// 283970
229399_at	0.428132	0.00412475	C10orf118	55088
242467_at	0.679086	0.00412565
237910_x_at	0.651181	0.00413065	FAM92A1	137392
236919_at	0.677883	0.00413343
243985_at	0.742235	0.00413544	GTF2A2	2958
234723_x_at	0.708333	0.00414269
239571_at	0.613629	0.0041761
240205_x_at	0.744086	0.00418366
203444_s_at	1.71767	0.00419879	MTA2	9219
206038_s_at	0.588728	0.00422045	NR2C2	7182
226474_at	1.3477	0.00424291	NLRC5	84166
243631_at	0.666052	0.00425301	MPHOSPH8	54737
222269_at	0.542907	0.00426898	APOOL	139322
232489_at	0.619983	0.00427599	CCDC76	54482
240865_at	0.61765	0.00429496
235132_at	0.776818	0.00429712	LOC254128	254128
232064_at	0.729532	0.00430154	FER	2241
210746_s_at	1.87512	0.00431888	EPB42	2038
202859_x_at	1.72098	0.0043271	IL8	3576
222330_at	0.546259	0.00435706
233204_at	0.735539	0.00436463	LOC728153	728153
230123_at	0.750825	0.0043676
234769_at	1.35311	0.00437142	DKFZp547J222	84237
1555153_s_at	0.508131	0.00439762	FCHO2	115548
213678_at	0.700212	0.00439983	TMEM151B	441151
1556462_a_at	0.613654	0.00440051
242352_at	0.426291	0.00440622	NIPBL	25836
208624_s_at	0.620353	0.00441892	EIF4G1	1981
215208_x_at	0.72193	0.00442788	RPL35A	6165
221307_at	0.708602	0.00443902	KCNIP1	30820
228516_at	0.830619	0.00444695	CDAN1	146059
244700_at	0.699132	0.00444872
235216_at	0.336633	0.00445032	ESCO1	114799
210474_s_at	1.45203	0.00445551	CDK11A /// CDK11B	728642 /// 984
242843_at	1.35116	0.00447827	BCAN	63827
212384_at	0.547559	0.00448476	ATP6V1G2 /// BAT1	534 /// 7919
236835_at	0.740677	0.00448483	LOC645431	645431
226732_at	1.20779	0.00451165	RBM33	155435
242622_x_at	0.526387	0.00454667	PTEN	5728
208797_s_at	0.623517	0.0045721	GOLGA8A	23015
1553123_at	1.38255	0.00460124	WDR62	284403
209062_x_at	0.606264	0.00461295	NCOA3	8202
236533_at	0.587944	0.00461674	ASAP1	50807
1552580_at	1.3266	0.00462422	TRIML2	205860
220699_s_at	0.661463	0.00464054	KIF2A	3796
202509_s_at	0.562285	0.00469375	TNFAIP2	7127
207520_at	0.680186	0.00469674
229765_at	0.661071	0.00469729	ZNF207	7756
235294_at	0.634481	0.00472485	SIKE1	80143
237485_at	0.704762	0.00472613	SFRS3	6428
210426_x_at	0.638584	0.00473155	RORA	6095
231999_at	0.73833	0.00474157	ANKRD11	29123
213719_s_at	1.30339	0.00475451	SMARCA4	6597
214731_at	1.32579	0.00476356
1562271_x_at	1.33496	0.0047839	ARHGEF7	8874
231939_s_at	0.759677	0.00478564	BDP1	55814
207127_s_at	1.20803	0.0047888	HNRNPH3	3189
227452_at	1.42055	0.00479867	LOC100499467	100499467
241955_at	0.562877	0.00484844	HECTD1	25831
224454_at	1.41254	0.00485607	ETNK1	55500
243696_at	0.595035	0.00485834	KIAA0562	9731
1553523_at	1.47187	0.00486135	NLRP14	338323
1559060_a_at	0.736738	0.00486975	FNIP1	96459
208541_x_at	0.637475	0.00489485	TFAM	7019
222302_at	1.4212	0.00490519	LOC100507009	100507009
236658_at	0.676339	0.00491322
236897_at	0.763856	0.00491557
237825_x_at	0.653948	0.00493115
1557174_a_at	0.78633	0.00494149
214690_at	0.67976	0.00495771	TAF1B	9014
204826_at	1.39239	0.00498241	CCNF	899
240829_at	0.717256	0.00498617
236733_at	0.689645	0.00501603
238672_at	0.767109	0.00502646
1556054_at	0.585812	0.00504054
221683_s_at	0.621377	0.00504473	CEP290	80184
224900_at	1.29006	0.00507346	ANKFY1	51479
207018_s_at	0.706354	0.00507611	RAB27B	5874
215348_at	1.46177	0.00508035	ADCY1	107
230804_at	0.662518	0.00511491	NKAPL	222698
1562028_at	1.62874	0.00512922	CCND3	896
1557118_a_at	0.727867	0.00514384
239333_x_at	0.770134	0.00515106
237497_at	0.676234	0.00516534
243304_at	0.741991	0.00516926	LOC286109	286109
1562314_at	0.715211	0.00517495
232610_at	1.50243	0.00519286	PARP14	54625
1561079_at	0.723785	0.00520754	ANKRD28	23243
222831_at	1.92117	0.00521064	SAP30L	79685
236207_at	0.449079	0.00521991	SSFA2	6744
213625_at	1.18817	0.00522993	ZKSCAN4	387032
235543_at	0.647846	0.0052493
244794_at	0.500854	0.00528285
243013_at	0.705877	0.00528454
220072_at	0.596981	0.00529006	CSPP1	79848
212926_at	0.607904	0.00530179	SMC5	23137
209941_at	1.16765	0.00534971	RIPK1	8737
241459_at	1.37103	0.00535024
211810_s_at	1.30609	0.00535999	GALC	2581
234036_x_at	0.587737	0.00536404
213658_at	1.30302	0.00539558
1555932_at	0.607775	0.00540307
1562443_at	1.39582	0.00541001	CLVS2	134829
226308_at	1.51201	0.00543265	HAUS8	93323
233912_x_at	0.774521	0.00546646
1556581_at	1.48175	0.0054731	ZNF778	197320
234234_at	1.39464	0.00550955
203479_s_at	0.61903	0.00551842	OTUD4	54726
1559546_s_at	1.35655	0.00555755	SNRPN	6638
224324_at	0.705097	0.00558801	MRO	83876
244154_at	0.713532	0.0056537	DDHD1	80821
1569238_a_at	0.586562	0.00565777
1555952_at	1.61297	0.00566835	SLC19A1	6573
238350_at	0.549198	0.00567325	UBN2	254048
242803_at	0.745209	0.00567588
228974_at	0.687036	0.00569656
235722_at	0.644748	0.00569994	SYNJ2BP	55333
207569_at	1.51674	0.00570268	ROS1	6098
217467_at	0.67152	0.00570503
208979_at	1.22429	0.00570514	NCOA6	23054
1562161_at	0.698921	0.00572947
236375_at	0.678906	0.00576172
217331_at	0.698752	0.00576912
244471_x_at	1.33566	0.0057695	PANX2	56666
219349_s_at	1.25852	0.00581704	EXOC2	55770
233034_at	0.605761	0.00582038
1554029_a_at	0.567851	0.00583688	TTC37	9652
215285_s_at	1.2862	0.0058466	PHTF1	10745
212107_s_at	0.444585	0.0058719	DHX9	1660
238575_at	1.51463	0.00588478	OSBPL6	114880
216797_at	1.36452	0.00588603
212660_at	1.25591	0.00591056	PHF15	23338
234470_at	0.683138	0.00591085	LOC143506	143506
1552383_at	0.693928	0.00592244	FAM71A	149647
240159_at	0.670189	0.00593516	SLC15A2	6565
234381_at	1.51538	0.00596934	IGLV4-3	28786
233387_s_at	0.694248	0.00601648	PCNT	5116
241913_at	0.663138	0.00604171
216114_at	0.700197	0.00605775	NCKIPSD	51517
243025_at	0.580997	0.00606988
244035_at	0.580525	0.00607199
1560255_at	1.4093	0.00609279	C10orf31	414196
1555617_x_at	0.7257	0.00609401
224875_at	0.699281	0.0061057	C5orf24	134553
224518_s_at	1.33427	0.00612055	ZNF559	84527
203972_s_at	1.20905	0.00613658	PEX3	8504
232464_at	0.66666	0.00613986	TRIM78P	117852
212999_x_at	2.2596	0.00614195	HLA-DQB1	3119
222367_at	0.691334	0.00615781	WHAMM /// WHAMML1 /// WHAMML2	123720 /// 339005 /// 440253
243284_at	0.799067	0.00615797	AAGAB	79719
211846_s_at	0.737854	0.00617665	PVRL1	5818
236620_at	0.609561	0.00618133	RIF1	55183
213783_at	1.43115	0.00620569	MFNG	4242
1555457_at	0.747509	0.0062078	DBC1	1620
222551_s_at	1.3798	0.00622062	C8orf33	65265
235290_at	0.656761	0.00625381	ZNF782	158431
210395_x_at	1.55205	0.00627175	MYL4	4635
216361_s_at	0.559017	0.00627534	MYST3	7994
232382_s_at	1.4117	0.00630372	PCMTD1	115294
234167_at	1.50531	0.00630795	MKI67IP	84365
240772_at	0.546413	0.00631221
244490_at	0.591482	0.006329
1563130_a_at	0.645881	0.00633118
201393_s_at	1.38157	0.00633159	IGF2R	3482
214888_at	0.75271	0.00637106	CAPN2	824
1563080_at	0.686424	0.00639167
203753_at	0.69415	0.0064062	TCF4	6925
1553832_at	0.728922	0.0064374	C21orf93	246704
239819_at	0.432479	0.00644316
224375_at	1.25802	0.00644446
230808_at	0.609665	0.00644737	FNTA	2339
1560472_at	0.709144	0.00646658	LOC338588	338588
1558722_at	1.35883	0.00647736	ZNF252	286101
1553215_s_at	0.34314	0.00648369	CCDC7	221016
215493_x_at	1.25582	0.00649939	BTN2A1	11120
1555125_at	0.607857	0.0065202	GCFC1	94104
1555913_at	0.650954	0.00652708	GON4L	54856
219191_s_at	1.29157	0.00655724	BIN2	51411
226391_at	1.20341	0.00656074
1559297_at	0.751763	0.00657243	LOC100288673	100288673
210605_s_at	1.52466	0.0065913	MFGE8	4240
212220_at	0.524435	0.00660983	PSME4	23198
1569641_at	0.757092	0.00661964
212180_at	1.20839	0.00664027	CRKL	1399
222616_s_at	0.736654	0.00665838	USP16	10600
212477_at	0.678237	0.00666904	ACAP2	23527
38241_at	1.45056	0.00667607	BTN3A3	10384
208437_at	1.42967	0.00668785	CLCN1	1180
220940_at	0.676909	0.00669347	ANKRD36B	57730
223160_s_at	1.2173	0.00674917	SMEK1	55671
201777_s_at	0.65059	0.00678083	KIAA0494	9813
1566973_at	0.738127	0.0068025
226999_at	0.756641	0.00682733	RNPC3	55599
236524_at	0.62763	0.00683382
1569225_a_at	1.26124	0.00684805	SCML4	256380
204806_x_at	1.29159	0.00685854	HLA-F	3134
1569568_at	1.35375	0.00686448
231700_at	0.645745	0.00687518	GUCA1A	2978
206705_at	0.678602	0.00687845	TULP1	7287
235811_at	0.560936	0.00688056
214511_x_at	1.35895	0.00690395	FCGR1B	2210
205514_at	0.609488	0.00694154	ZNF415	55786
202015_x_at	0.763731	0.00696667
234299_s_at	1.32171	0.00703534	NIN	51199
235094_at	1.42303	0.00705766
1555063_at	1.30296	0.00707634	USP6	9098
231647_s_at	0.433348	0.00707972	FCRL5	83416
238651_at	0.753466	0.00709077
215393_s_at	0.632738	0.00709569	COBLL1	22837
243107_at	0.597396	0.00711526
200732_s_at	1.26856	0.00713696	PTP4A1	7803
235879_at	0.691098	0.0071555	MBNL1	4154
1568609_s_at	1.41236	0.00717091	FAM91A2 /// FLJ39739 /// LOC100286793 /// LOC728855 /// LOC728875	100286793 /// 388685 /// 57234 /// 728855 /// 728875
216842_x_at	1.37841	0.00718966	RBMY1A1 /// RBMY1B /// RBMY1D /// RBMY1E /// RBMY1F /// RBMY1J	159163 /// 378948 /// 378949 /// 378950 /// 378951 /// 5940
243196_s_at	1.2742	0.00719909	TRAFD1	10906
1569834_at	0.684088	0.00720878
241832_at	0.658593	0.00720884	FAM98A	25940
1556287_a_at	0.720486	0.00721613	LOC100287407	100287407
212756_s_at	1.25839	0.00724471	UBR2	23304
1564658_at	0.649533	0.00727739	C7orf52	375607
1561052_s_at	1.4941	0.00727869
233209_at	0.718811	0.00729344	LOC200609	200609
211462_s_at	0.62223	0.00730727	TBL1Y	90665
1554217_a_at	0.592671	0.00731441	CCDC132	55610
208499_s_at	0.703423	0.00731852	DNAJC3	5611
201039_s_at	0.615877	0.00732099	RAD23A	5886
241219_at	0.706927	0.00733311
1566688_at	1.26748	0.00733924
1564164_at	0.640885	0.00736383	DENND1B	163486
229629_at	1.30051	0.00737905
225816_at	0.821283	0.00738026	PHF17	79960
1557133_at	1.37442	0.00739345	RP1-177G6.2	286411
242319_at	0.662992	0.00741992	DGKG	1608
1554212_s_at	1.40724	0.00742484	KCNS2	3788
1555760_a_at	1.2735	0.00744431	RBM15	64783
204924_at	1.34008	0.00749583	TLR2	7097
206707_x_at	1.26527	0.00749957	FAM65B	9750
215579_at	0.689571	0.00751597	APOBEC3G	60489
235451_at	0.729098	0.00752299	SMAD5	4090
239823_at	1.55392	0.00757087
200952_s_at	0.53554	0.00758299	CCND2	894
236435_at	0.579403	0.00759529
227175_at	1.63855	0.00760005	MCL1	4170
215338_s_at	0.770438	0.00761119	NKTR	4820
1557689_at	1.45726	0.00763084
238722_x_at	0.81495	0.00766019	NAPEPLD	222236
236841_at	0.645097	0.00769442	LOC100134445	100134445
235605_at	1.44059	0.00774534	CASZ1	54897
233747_at	1.21359	0.00776711
1561951_at	1.36224	0.00776786	SLC5A12	159963
201466_s_at	1.46576	0.00777263	JUN	3725
244014_x_at	0.737107	0.00779237
1557841_at	0.687842	0.0078083
221554_at	1.45911	0.00781381	STRADA	92335
232125_at	0.616324	0.00782598
213352_at	1.34225	0.00784652	TMCC1	23023
206658_at	1.35009	0.00787324	UPK3B	80761
240846_at	0.643607	0.00795303	PCBD2	84105
210057_at	0.600476	0.00797818	SMG1	23049
1557036_at	0.747393	0.00799984	ZBTB1	22890
1563590_at	0.744271	0.00804003
202759_s_at	1.24113	0.0080504	AKAP2 /// PALM2-AKAP2	11217 /// 445815
223220_s_at	1.48512	0.00805231	PARP9	83666
201473_at	1.28302	0.00806029	JUNB	3726
221564_at	1.24002	0.00807965	PRMT2	3275
236669_at	0.803735	0.00808245
1558831_x_at	0.63572	0.00808561
215575_at	0.649924	0.0080872	PDE4DIP	9659
203220_s_at	0.63295	0.00808983	TLE1	7088
216211_at	0.681265	0.00809019
216618_at	0.746055	0.00809457
238122_at	0.794556	0.00810154	RBM12B	389677
236000_s_at	0.634829	0.00811071
230724_s_at	0.743165	0.00811841	C11orf57	55216
213967_at	1.31916	0.00811976	RALYL	138046
1554287_at	0.668809	0.00812178	TRIM4	89122
213096_at	0.683098	0.00813738	TMCC2	9911
241988_x_at	0.659264	0.00815026
239655_at	0.650682	0.0082035
229312_s_at	0.704785	0.00820993	GKAP1	80318
1568702_a_at	0.692798	0.00824808	PAAF1	80227
228162_at	0.830039	0.00826963	ESD	2098
235388_at	0.78366	0.00833416	CHD9	80205
236297_at	0.692122	0.00834313
215352_at	0.465906	0.00835292
210809_s_at	0.719598	0.00836547	POSTN	10631
227403_at	1.53018	0.00836955	PIGX	54965
1567213_at	1.28784	0.00837645	PNN	5411
1554985_at	0.783381	0.00838718	ZNF396	252884
201041_s_at	1.43584	0.0083917	DUSP1	1843
228685_at	1.25424	0.00840443	IL17RA	23765
205949_at	0.703436	0.00845602	CA1	759
212725_s_at	1.25362	0.00849669	TUG1	55000
243705_at	0.656887	0.00849769	DDHD1	80821
205457_at	0.611831	0.00850786	C6orf106	64771
236493_at	0.715977	0.00853856	NKAPP1	158801
220145_at	0.716035	0.00854339	MAP9	79884
1555052_a_at	0.747535	0.00855925	SYT9	143425
220946_s_at	0.563507	0.00856265	SETD2	29072
219634_at	1.31096	0.00857152	CHST11	50515
212639_x_at	1.30873	0.00857388	TUBA1B	10376
243259_at	1.19466	0.00857495	ATXN7	6314
216610_at	0.683175	0.00860561	SLC6A2	6530
220104_at	1.3431	0.00860956	ZC3HAV1	56829
234351_x_at	0.697254	0.00861478	TRPS1	7227
235743_at	0.615284	0.00862275
215071_s_at	1.24631	0.00862821	HIST1H2AC	8334
229728_at	0.581614	0.00862963
219507_at	0.616455	0.00865412	RSRC1	51319
239867_at	0.727822	0.00867422
206917_at	1.71999	0.00869317	GNA13	10672
233700_at	0.63988	0.00869745
213607_x_at	1.35951	0.00871277	NADK	65220
1556318_s_at	0.792931	0.00872473
219145_at	0.725863	0.00873549	LPHN1	22859
243578_at	0.660037	0.00873955
226745_at	1.20701	0.00874347	CYP4V2	285440
225929_s_at	1.41133	0.00874818	RNF213	57674
238243_at	0.737665	0.00877395
209225_x_at	0.736908	0.00879091	TNPO1	3842
1562074_a_at	0.762287	0.00880272	UNC13C	440279
205787_x_at	0.541542	0.00883956	ZC3H11A	9877
207253_s_at	1.32537	0.00884325	UBN1	29855
1560397_s_at	0.643355	0.00884901	KLHL6	89857
238196_at	1.34378	0.00893506	LOC285095	285095
200928_s_at	0.798031	0.00894822	RAB14	51552
234044_at	0.613387	0.00894822
1561004_at	0.663019	0.00897287
232826_at	0.711792	0.00900207
1552822_at	0.711833	0.00903439	TMX3	54495
222313_at	0.63627	0.009045
233012_at	0.703108	0.00906785
242233_at	0.694228	0.00908584
233678_at	0.81141	0.00908654
230772_at	1.30361	0.00908751
239851_at	0.731312	0.00910195
202978_s_at	1.26967	0.00916142	CREBZF	58487
217576_x_at	0.647796	0.00916823	SOS2	6655
232797_at	0.745037	0.00921582
220250_at	1.33141	0.00922182	ZNF286A	57335
225009_at	0.769536	0.00924634	CMTM4	146223
1559249_at	0.653672	0.00925689	ATXN1	6310
1558924_s_at	0.49407	0.00926664	CLIP1	6249
244042_x_at	0.530105	0.00927396
1558320_at	0.766978	0.00927808
212862_at	1.29846	0.00928552	CDS2	8760
217444_at	1.3886	0.00928995
1553020_at	0.710638	0.00929717	SMCR5	140771
206834_at	1.61253	0.00930189	HBD	3045
212577_at	1.3918	0.00931446	SMCHD1	23347
213623_at	0.783018	0.00932284	KIF3A	11127
203532_x_at	0.650956	0.00933451	CUL5	8065
242059_at	0.737864	0.00933728
241531_at	1.3553	0.00934694
1564378_a_at	0.654288	0.00934836
241278_at	0.630684	0.00937145
218041_x_at	1.28992	0.00937523	SLC38A2	54407
238599_at	0.743304	0.00938381	IRAK1BP1	134728
228216_at	1.23091	0.00943534
223888_s_at	0.436085	0.00951233	LARS	51520
207563_s_at	1.22657	0.00951705	OGT	8473
225179_at	1.17312	0.00952893	UBE2K	3093
231548_at	1.41267	0.00955002	FOXO3	2309
202100_at	1.29613	0.00955629	RALB	5899
237588_at	0.58816	0.00959714
223780_s_at	0.656403	0.00962303	MED13	9969
229991_s_at	0.723596	0.00964797	SYTL4	94121
243988_at	0.668408	0.00967245
242549_at	0.616045	0.00968004	PRKD3	23683
216310_at	0.615102	0.00972494	TAOK1	57551
216381_x_at	0.647838	0.00974169	AKR7A3	22977
223200_s_at	0.761403	0.00975182	LSG1	55341
220924_s_at	1.2956	0.00976027	SLC38A2	54407
228449_at	1.43152	0.00976322
1553214_a_at	0.387829	0.00978808	CCDC7	221016
215457_at	0.684314	0.00979399
213279_at	1.24149	0.00979778	DHRS1	115817
204300_at	1.40373	0.0098091	PET112L	5188
228913_at	0.759923	0.00983219	LOC100190939	100190939
210559_s_at	1.76514	0.00984412	CDK1	983
232588_at	0.728817	0.00984539	STAG1	10274
220419_s_at	1.24348	0.00988251	USP25	29761
211506_s_at	2.03736	0.00992717	IL8	3576
1554671_a_at	0.652419	0.00993541	SRRM2	23524
1563263_at	1.33471	0.00996782	PLCG2	5336
210088_x_at	1.4848	0.0100197	MYL4	4635
212965_at	0.720848	0.0100217	HIC2	23119
211256_x_at	1.18459	0.0100925	BTN2A1	11120
223254_s_at	0.671884	0.0101091	G2E3	55632
204047_s_at	0.630284	0.0101759	PHACTR2	9749
227632_at	0.701409	0.0101851	TBC1D24	57465
236930_at	0.686013	0.0102015	NUMB	8650
1559642_a_at	0.685832	0.0102424
208615_s_at	0.81969	0.0102776	PTP4A2	8073
1564166_s_at	0.782142	0.0102836	PRKRIP1	79706
244181_at	0.72579	0.0102987
1567013_at	0.742609	0.0103146	NFE2L2	4780
205051_s_at	1.43305	0.0103483	KIT	3815
1561720_at	0.667888	0.0103708	RECQL5	9400
221957_at	1.18737	0.0103833	PDK3	5165
224859_at	1.34353	0.0104063	CD276	80381
239415_at	0.708194	0.0104107	MAP9	79884
1566691_at	0.759401	0.0104511
239817_at	0.621509	0.0104699
234050_at	1.25941	0.0105	TAGAP	117289
241831_at	0.737509	0.0105033
1553369_at	0.673261	0.0105296	FAM129C	199786
217127_at	1.25431	0.0105461	CTH	1491
236333_at	1.32232	0.0105666
215248_at	1.43701	0.0105675	GRB10	2887
1560662_s_at	0.735215	0.0105904	WHAMML1 /// WHAMML2	339005 /// 440253
226684_at	1.20104	0.0106326	ATG2B	55102
220023_at	1.33008	0.0106522	APOB48R	55911
238506_at	0.603371	0.0106681	LRRC58	116064
216054_x_at	1.46977	0.0107391	MYL4	4635
238073_at	0.72807	0.010742	ELAVL4	1996
1553266_at	0.680391	0.0107457	CNOT6L	246175
207175_at	0.664831	0.0107564	ADIPOQ	9370
244132_x_at	0.701122	0.0107583	ZNF518A	9849
240142_at	1.39693	0.0107753
203491_s_at	0.628836	0.0107953	CEP57	9702
203797_at	0.755298	0.0108005	VSNL1	7447
244737_at	0.762901	0.0108011
234089_at	1.37679	0.010826
213361_at	1.30318	0.0108357	TDRD7	23424
237107_at	0.650121	0.0108712	PRKRA	8575
238277_at	0.655777	0.0108861
1569302_at	0.770308	0.0109059	KIAA1731	85459
212471_at	1.3026	0.0109349	AVL9	23080
1555007_s_at	1.33075	0.0109438	WDR66	144406
213088_s_at	1.22811	0.0109586	DNAJC9	23234
229982_at	0.718239	0.0109923	QSER1	79832
225562_at	1.23896	0.0109982	RASA3	22821
1555315_a_at	1.67814	0.0110161	MAK	4117
201546_at	1.24656	0.0110214	TRIP12	9320
224618_at	0.761435	0.0110431	ROD1	9991
217649_at	0.762333	0.0110475	ZFAND5	7763
207334_s_at	0.641464	0.0110479	TGFBR2	7048
1556551_s_at	0.565225	0.0110535	SLC39A6	25800
1557008_at	0.717669	0.0110975	LOC340107	340107
204278_s_at	0.797556	0.0111439	EBAG9	9166
211997_x_at	1.31618	0.0111546	H3F3B	3021
202766_s_at	1.42925	0.0111605	FBN1	2200
1562957_at	0.646509	0.0111974
240655_at	0.677434	0.0112243
1553627_s_at	0.530809	0.01123	C17orf57	124989
1561593_at	0.74622	0.0112311
1556113_at	0.686711	0.0112472	DKFZp451A211	400169
210479_s_at	0.60971	0.0112511	RORA	6095
237560_at	0.641551	0.0112521	MRPS5	64969
241205_at	0.631705	0.0112755
215935_at	0.745063	0.0112759	FAM75A1 /// FAM75A2 /// FAM75A3 /// FAM75A4 /// FAM75A5 /// FAM75A6 /// FAM75A7	26165 /// 389730 /// 642265 /// 642629 /// 647060 /// 727830 /// 727905
209804_at	1.70303	0.0113313	DCLRE1A	9937
1562368_at	1.36758	0.0113329	CARD11	84433
229759_s_at	0.640614	0.011341	VEPH1	79674
231912_s_at	0.674211	0.0113468	TECPR1	25851
1556461_at	0.63809	0.0114065
1556432_at	0.691493	0.0114158
210581_x_at	1.32122	0.0114183	PATZ1	23598
1568848_at	1.29724	0.0114276
230311_s_at	0.723013	0.0114446	PRDM6	93166
236971_at	0.612796	0.0115468
230815_at	0.795874	0.0115614	LOC389765	389765
218368_s_at	1.36875	0.0115738	TNFRSF12A	51330
244027_at	0.614944	0.0115876
202845_s_at	1.21416	0.0116121	RALBP1	10928
237569_at	0.685913	0.0116163
214153_at	0.786071	0.0116197	ELOVL5	60481
237377_at	0.669275	0.0116446
230456_at	0.719951	0.0116865
233251_at	0.58544	0.0116867	STRBP	55342
240254_at	0.529474	0.0117273
240121_x_at	0.733417	0.011737
202323_s_at	0.692284	0.0117413	ACBD3	64746
206252_s_at	1.36528	0.0117492	AVPR1A	552
214741_at	1.26381	0.0117539	ZNF131	7690
1556325_at	0.696404	0.0117569	FILIP1	27145
232511_at	0.775968	0.0117635
241620_at	0.449594	0.0117932	SMCHD1	23347
217430_x_at	1.3147	0.0118092	COL1A1	1277
209440_at	1.22155	0.0118548	PRPS1	5631
213742_at	0.648594	0.0118584	SRSF11	9295
1554602_at	1.34352	0.0119333	RBM8A	9939
1566603_s_at	0.787528	0.011939	RPUSD3	285367
212219_at	1.22956	0.0119474	PSME4	23198
220092_s_at	1.32562	0.0119975	ANTXR1	84168
231933_at	0.590432	0.0120202	MAR8	220972
1561591_at	1.35418	0.0120292
202435_s_at	0.693969	0.0120421	CYP1B1	1545
221043_at	0.737746	0.0120885
243969_at	0.761714	0.0120971	SLC24A4	123041
211037_s_at	1.30511	0.0121084	MBOAT7	79143
241394_at	0.697383	0.0121163
210858_x_at	1.32777	0.0121334	ATM	472
202535_at	1.24357	0.0121346	FADD	8772
214807_at	0.670922	0.0121484
233658_at	0.687405	0.0121645
236837_x_at	0.713594	0.0121928	LOC650794	650794
227954_at	0.838308	0.0122207	ITPRIPL2	162073
243182_at	0.692442	0.0122316
1555878_at	0.771744	0.0122351	RPS24	6229
215396_at	1.27034	0.0122594	GPR98	84059
232928_at	0.744002	0.0122623
1568857_a_at	0.706535	0.0122816	NBR1	4077
240239_at	0.795024	0.0122816	ZNF566	84924
244026_at	0.650079	0.0123987
244607_at	0.668997	0.0124005
1559353_at	0.709368	0.012441
200622_x_at	1.25011	0.0124489	CALM3	808
219814_at	0.578013	0.0124681	MBNL3	55796
229958_at	0.787757	0.0124852	CLN8	2055
220676_at	0.674127	0.0125253	ADAMTS8	11095
1555895_at	1.53344	0.0126016	DNM2	1785
202818_s_at	0.759035	0.012624	TCEB3	6924
1552582_at	0.658391	0.0126581	ABCC13	150000
212264_s_at	1.23479	0.0126751	WAPAL	23063
241884_at	0.717093	0.0126807
224871_at	1.24487	0.0126922	TPRG1L	127262
217813_s_at	0.748903	0.0127039	SPIN1	10927
202636_at	1.20275	0.0127053	RNF103	7844
218009_s_at	1.37351	0.0127078	PRC1	9055
202317_s_at	1.22671	0.0127416	UBE4B	10277
215846_at	0.666556	0.0127504
227719_at	0.766717	0.0127548	SMAD9	4093
1553626_a_at	0.39826	0.0127581	C17orf57	124989
204444_at	1.45029	0.0127644	KIF11	3832
240703_s_at	0.578083	0.0127833	HERC1	8925
224569_s_at	0.845086	0.0129128	IRF2BP2	359948
214869_x_at	0.726568	0.0129799	GAPVD1	26130
226815_at	1.42477	0.0129808	C3orf31	132001
1556818_at	0.659351	0.013032
204583_x_at	1.3746	0.0130649	KLK3	354
201887_at	1.24782	0.0130673	IL13RA1	3597
228713_s_at	0.719129	0.0130922	HSD17B14	51171
213956_at	0.611663	0.0130934	CEP350	9857
233105_at	0.743826	0.0130952
209546_s_at	1.39103	0.0131089	APOL1	8542
240146_at	0.665364	0.0131337
214095_at	0.700768	0.0131405	SHMT2	6472
201392_s_at	1.34031	0.0132179	IGF2R	3482
1562338_at	0.694356	0.0132773	MAR1	55016
241572_at	0.794751	0.0133276	PDZD9	255762
235469_at	0.702915	0.0133956	FAM133B /// LOC728066	257415 /// 728066
222544_s_at	0.705694	0.0133962	WHSC1L1	54904
232088_x_at	0.677638	0.0134214	LOC100271722	100271722
1569371_at	0.704724	0.0134436	LRRC59	55379
228556_at	0.700192	0.0134822	YTHDC1	91746
216465_at	0.67234	0.0134948
242261_at	0.814712	0.0135001
209544_at	0.830042	0.0135356	RIPK2	8767
205105_at	1.21236	0.0135465	MAN2A1	4124
239545_at	0.725031	0.0135732
202815_s_at	1.19884	0.0136231	HEXIM1	10614
240399_at	0.738682	0.013647
1554932_at	0.816723	0.013655	ZSWIM2	151112
1559292_s_at	0.782849	0.0136907	NCRNA00032	158035
1559132_at	0.793998	0.0136911	TMEM80	283232
222661_at	1.20488	0.0136914	AGGF1	55109
220386_s_at	1.3593	0.0137103	EML4	27436
239692_at	0.676284	0.0137221
242428_at	0.73623	0.0137576	DCUN1D1	54165
239351_at	0.665416	0.0137664
236934_at	0.464681	0.0137693
214122_at	1.35207	0.0137923	PDLIM7	9260
214525_x_at	1.55158	0.0137943	MLH3	27030
213517_at	0.682266	0.0137963	PCBP2	5094
1569136_at	1.37484	0.0138302	MGAT4A	11320
237179_at	0.744184	0.0138385	PCMTD2	55251
226555_at	1.2095	0.0138685	INO80D	54891
1562249_at	0.651929	0.013871	LOC285965	285965
236879_at	0.66816	0.0138716
236946_at	0.648528	0.0138828
203471_s_at	1.2531	0.0138837	PLEK	5341
238536_at	0.752279	0.0138897
233229_at	0.715399	0.0138918	SCFD1	23256
223520_s_at	1.37761	0.013892	KIF13A	63971
205413_at	0.588469	0.0139661	MPPED2	744
201083_s_at	0.749806	0.0139683	BCLAF1	9774
221523_s_at	1.22742	0.0141174	RRAGD	58528
237459_at	0.677881	0.0141182
238789_at	1.30703	0.0141232	KANK1 /// LOC100505905	100505905 /// 23189
220171_x_at	0.785438	0.0141768	KIAA1704	55425
229795_at	0.721223	0.0141827
241464_s_at	1.3652	0.0141938	LOC400931	400931
205966_at	0.528481	0.0142222	TAF13	6884
233339_s_at	1.31872	0.0142267	ARID1B	57492
205098_at	1.30782	0.0142348	CCR1	1230
233362_at	1.61766	0.0142499	ZNF341	84905
219314_s_at	1.35698	0.0142612	ZNF219	51222
1555411_a_at	1.39278	0.014266	CCNL1	57018
239328_at	1.24096	0.0143164
232078_at	1.35561	0.0143512	PVRL2	5819
242995_at	0.792072	0.0143571
239060_at	0.690827	0.0143904
223584_s_at	0.706079	0.0144008	KBTBD2	25948
209065_at	0.728421	0.0144035	UQCRB	7381
207201_s_at	1.399	0.0144257	SLC22A1	6580
225076_s_at	1.30994	0.0144667	ZNFX1	57169
1558890_at	1.26257	0.0144878	LOC100507054	100507054
236743_at	0.756507	0.0144899	AGPAT6	137964
240789_at	0.748471	0.0144909
229539_at	0.666446	0.0144918	ABCB8	11194
228918_at	1.29093	0.014525	LOC100288617	100288617
1555971_s_at	1.17693	0.0145403	FBXO28	23219
226975_at	0.700168	0.0145608	RNPC3	55599
217561_at	0.74175	0.0145811	CALCA	796
238932_at	0.72644	0.0145982
239340_at	0.74917	0.0146073
212546_s_at	1.24788	0.0146215	FRYL	285527
207357_s_at	0.742448	0.0146229	GALNT10	55568
239895_at	0.6613	0.0146239	AQR	9716
219555_s_at	1.52397	0.0146241	CENPN	55839
203882_at	1.3868	0.0146795	IRF9	10379
238248_at	1.37932	0.0146819	UMOD	7369
213646_x_at	1.26483	0.0147156	TUBA1B	10376
1560222_at	0.733571	0.0147635
232496_at	0.784277	0.0147639
237158_s_at	0.445159	0.0147764	MPHOSPH9	10198
227338_at	1.263	0.0147941	LOC440983	440983
241091_at	0.769024	0.0147993
201356_at	1.19287	0.0148009	SF3A1	10291
223432_at	0.615733	0.0148299	OSBP2	23762
242975_s_at	0.627281	0.0148328
202539_s_at	1.22164	0.0148384	HMGCR	3156
235507_at	0.722722	0.0148422	PCMTD1	115294
1553163_at	1.42121	0.0148439	ADPRHL1	113622
220764_at	0.654703	0.0148606	PPP4R2	151987
209808_x_at	1.18557	0.0148635	ING1	3621
221007_s_at	0.846973	0.0148638	FIP1L1	81608
205411_at	0.659799	0.0148691	STK4	6789
223138_s_at	0.800948	0.0148709	DHX36	170506
1555827_at	1.27875	0.0148988	CCNL1	57018
1568717_a_at	0.561187	0.014988	FKBP15	23307
1568870_at	0.753162	0.0149911	SLC24A4	123041
206176_at	1.33168	0.0149989	BMP6	654
228858_at	1.5668	0.0150501
211610_at	1.30055	0.0150503	KLF6	1316
231550_at	1.3233	0.0150556	XYLT2	64132
215992_s_at	0.603595	0.015062	RAPGEF2	9693
242969_at	0.843326	0.0150685	ZNF780B	163131
219380_x_at	0.815826	0.0150705	POLH	5429
240768_x_at	0.644462	0.0151199
239818_x_at	1.31747	0.0151215	TRIB1	10221
231207_at	0.788907	0.0152102
1554761_a_at	1.49517	0.0152125	HEATR2	54919
206196_s_at	0.664704	0.0152247	RUNDC3A	10900
213652_at	0.700452	0.0152268	PCSK5	5125
1569491_at	0.741429	0.0152291
206015_s_at	1.16338	0.0152338	FOXJ3	22887
231809_x_at	0.851663	0.0153183	PDCD7	10081
224585_x_at	1.21953	0.0153876	ACTG1	71
212762_s_at	0.700882	0.0153949	TCF7L2	6934
227425_at	1.31223	0.0153987	REPS2	9185
1555058_a_at	0.635804	0.0154246	LPGAT1	9926
207090_x_at	0.626611	0.0154518	ZFP30	22835
1555677_s_at	0.520351	0.0154585	SMC1A	8243
218167_at	1.22419	0.0154702	AMZ2	51321
206348_s_at	1.33754	0.0154955	PDK3	5165
238631_at	0.733319	0.0155406	ZNF140	7699
235707_at	1.30089	0.0155503	LOC221710	221710
243201_at	1.40622	0.0155794	HNRNPH2	3188
220469_at	0.623656	0.015628	COPE	11316
236723_at	0.655705	0.0156394
216232_s_at	1.43024	0.0156854	GCN1L1	10985
204054_at	1.24247	0.015701	PTEN	5728
214212_x_at	0.729103	0.0157181	FERMT2	10979
201786_s_at	1.28617	0.0157214	ADAR	103
233152_x_at	0.735313	0.0157234
201522_x_at	1.18141	0.0157571	SNRPN /// SNURF	6638 /// 8926
207876_s_at	1.36759	0.015773	FLNC	2318
209127_s_at	0.762872	0.0157868	SART3	9733
216206_x_at	0.75489	0.0157934	MAP2K7	5609
203833_s_at	0.747564	0.015803	TGOLN2	10618
212865_s_at	1.27926	0.015807	COL14A1	7373
236104_at	1.25096	0.0158089	HNRPLL	92906
1557437_a_at	0.686689	0.0158099
201529_s_at	1.18611	0.0158476	RPA1	6117
204096_s_at	1.29893	0.0158518	ELL	8178
242499_at	1.33629	0.0158555	U2AF1	7307
207139_at	1.44634	0.0158649	ATP4A	495
1553060_at	0.710931	0.0158719	PSKH2	85481
228986_at	0.40529	0.0158745	OSBPL8	114882
205837_s_at	0.577987	0.0158817	GYPA	2993
236337_at	1.87469	0.0159455	SYCP2L	221711
213360_s_at	1.21045	0.01597	POM121 /// POM121C	100101267 /// 9883
1556812_a_at	0.530715	0.0159743
213328_at	0.692135	0.0160501	NEK1	4750
224096_at	1.37144	0.0160599
1570534_a_at	1.33163	0.0161025	ZNF483	158399
239301_at	0.694035	0.0161119
209202_s_at	1.49231	0.0161688	EXTL3	2137
224847_at	1.20158	0.0161794	CDK6	1021
208034_s_at	1.33324	0.0161815	PROZ	8858
1557218_s_at	0.559305	0.0161982	FANCB	2187
202348_s_at	1.14959	0.0162314	TOR1A	1861
211949_s_at	0.606455	0.0162575	NOLC1	9221
210218_s_at	0.675569	0.0162645	SP100	6672
244162_at	0.519071	0.0162727
230419_at	0.71089	0.0162978	FLJ37644	400618
207691_x_at	1.21186	0.0163301	ENTPD1	953
202162_s_at	1.21109	0.0163958	CNOT8	9337
1552536_at	0.673135	0.0164009	VTI1A	143187
240697_at	0.925719	0.0164103
209067_s_at	1.22469	0.0164215	HNRPDL	9987
230742_at	0.697836	0.0164579
207614_s_at	1.21283	0.0164589	CUL1	8454
1558987_at	0.703721	0.0164667
212237_at	1.1469	0.0164837	ASXL1	171023
220572_at	0.719654	0.0165212	DKFZp547G183	55525
1562764_at	1.33485	0.0165242
212263_at	1.25178	0.0166618	QKI	9444
237114_at	0.838107	0.0166774
209007_s_at	0.795779	0.0167379	C1orf63	57035
213799_s_at	0.518588	0.0167392	PTPRA	5786
242663_at	0.779517	0.0167512	LOC148189	148189
206245_s_at	1.25636	0.0167661	IVNS1ABP	10625
240246_at	0.501035	0.0167917	LOC642236	642236
236613_at	0.680314	0.0168192	RBM25	58517
1558842_at	0.571011	0.0168652
216287_at	0.7258	0.0168707
202730_s_at	1.2653	0.0168797	PDCD4	27250
223110_at	1.17734	0.0168819	KIAA1429	25962
203202_at	0.792862	0.0169068	KRR1	11103
225224_at	1.18812	0.0169079	C20orf112	140688
209640_at	1.24718	0.0169282	PML	5371
1566003_x_at	0.728164	0.0169454
210874_s_at	0.556484	0.0169495	NAT6	24142
1562230_at	0.647724	0.0169638
231484_at	0.510179	0.0169667
203091_at	1.23126	0.0169747	FUBP1	8880
228725_x_at	1.23572	0.0169962	PRMT2	3275
219723_x_at	0.758372	0.0169981	AGPAT3	56894
224216_at	0.475539	0.01702
237040_at	0.751855	0.0170659	CWF19L2	143884
1566182_at	0.739514	0.0170833
236462_at	0.648074	0.0171199
229555_at	0.706898	0.017133	GALNT5	11227
228647_at	1.26064	0.017166	LOC100049716	100049716
222600_s_at	0.772389	0.0171943	UBA6	55236
208930_s_at	0.642558	0.0171956	ILF3	3609
240613_at	0.594952	0.0172497	JAK1	3716
1562317_at	1.28869	0.0172645	FAM186A	121006
215624_at	0.598919	0.0172785	TSC2	7249
1562811_at	0.754695	0.0172854
1555758_a_at	1.42176	0.0173174	CDKN3	1033
206517_at	1.13626	0.0173265	CDH16	1014
227125_at	1.18447	0.0173443	IFNAR2	3455
210697_at	0.624709	0.0173498	ZNF257	113835
222859_s_at	1.29204	0.017351	DAPP1	27071
225005_at	1.17505	0.0173926	PHF13	148479
237919_at	1.34603	0.0173976	RFFL	117584
242357_x_at	0.759059	0.0174296
1558686_at	0.727491	0.0174472
1563947_a_at	0.747469	0.0175108	ERC1	23085
1566046_at	0.774634	0.0175395
235327_x_at	0.847902	0.0175712	UBXN2A	165324
1569385_s_at	0.621059	0.0175998	TET2	54790
203595_s_at	1.61554	0.0175998	IFIT5	24138
221673_s_at	0.734784	0.0177155	CSNK1G1	53944
237628_at	0.73536	0.0177499
205092_x_at	0.703724	0.017783	ZBTB1	22890
205607_s_at	1.17231	0.0177898	SCYL3	57147
217128_s_at	0.681404	0.0177951	CAMK1G	57172
236254_at	0.624341	0.0178484	VPS13B	157680
201730_s_at	0.648754	0.017899	TPR	7175
237456_at	0.655057	0.0179059
200696_s_at	1.3176	0.0179294	GSN	2934
209750_at	0.700867	0.0179562	NR1D2	9975
205480_s_at	1.26891	0.0179586	UGP2	7360
1562255_at	0.709633	0.0179696	SYTL3	94120
205511_at	0.644636	0.0179985	FLJ10038	55056
214831_at	1.88427	0.0180105	ELK4	2005
201853_s_at	1.37605	0.018019	CDC25B	994
227454_at	0.577401	0.0180221	TAOK1	57551
232229_at	0.735806	0.018025	SETX	23064
200997_at	1.20297	0.0180319	RBM14 /// RBM4	10432 /// 5936
210191_s_at	1.18557	0.0180954	PHTF1	10745
238931_at	1.1877	0.0181027	METT10D	79066
240601_at	0.694354	0.0181111
209615_s_at	1.28728	0.0181493	PAK1	5058
213983_s_at	0.713863	0.0181626	PDS5A	23244
222463_s_at	0.608858	0.0181906	BACE1	23621
201001_s_at	0.766907	0.0182131	TMEM189-UBE2V1 /// UBE2V1	387522 /// 7335
211584_s_at	0.725327	0.0182422	NPAT	4863
202503_s_at	1.51282	0.0182437	KIAA0101	9768
231793_s_at	0.787275	0.0182588	CAMK2D	817
217841_s_at	0.710454	0.0182967	PPME1	51400
233897_at	1.33529	0.0183024	FEZF2	55079
1566673_at	0.790789	0.0183146
1560926_at	0.611669	0.0183504
235841_at	0.729882	0.0183963
200984_s_at	1.22122	0.0184346	CD59	966
212214_at	1.31261	0.0184534	OPA1	4976
228869_at	1.26106	0.0184554	SNX20	124460
1564357_at	1.32076	0.0184844	ABHD12B	145447
1557504_at	0.770287	0.0184889
200811_at	1.22634	0.0185071	CIRBP	1153
209380_s_at	1.41002	0.0185158	ABCC5	10057
227991_x_at	1.21792	0.0185176	ZBTB43	23099
229010_at	0.602549	0.0185367	CBL	867
211075_s_at	1.21619	0.018544	CD47	961
33768_at	1.2709	0.0185525	DMWD	1762
231850_x_at	0.826281	0.0185638	KIAA1712	80817
215174_at	0.729158	0.0186555	FMO6P	388714
202412_s_at	0.64053	0.0186935	USP1	7398
238303_at	0.680292	0.0187164	STT3B	201595
217593_at	0.681914	0.0187517	ZSCAN18	65982
203542_s_at	0.758612	0.0188553	KLF9	687
206463_s_at	1.20565	0.0188574	DHRS2	10202
222927_s_at	0.775843	0.01887	CPLX3 /// LMAN1L	594855 /// 79748
236428_at	0.625818	0.018883
218733_at	1.28274	0.0188877	MSL2	55167
225054_x_at	0.671068	0.0189215	LOC100499466	100499466
204075_s_at	0.826991	0.0189768	KIAA0562	9731
235152_at	0.79118	0.0189829
1553155_x_at	1.25621	0.0189936	ATP6V0D2	245972
202472_at	1.31085	0.0189942	MPI	4351
243992_at	0.746488	0.0190158
243765_at	0.729188	0.0190162
218729_at	0.794483	0.0190577	LXN	56925
218348_s_at	1.17802	0.0190657	ZC3H7A	29066
211998_at	1.25658	0.019077	H3F3B	3021
214882_s_at	1.19403	0.0191104	SRSF2	6427
236395_at	0.785483	0.0191147
1557479_at	1.38291	0.0191438
238635_at	0.729088	0.0191773	C5orf28	64417
203556_at	1.21839	0.0191826	ZHX2	22882
227161_at	1.20013	0.0192358	NOM1	64434
215541_s_at	0.729554	0.0192425	DIAPH1	1729
201631_s_at	1.47821	0.0192767	IER3	8870
209310_s_at	1.29189	0.0192875	CASP4	837
242701_at	0.757398	0.0193129	TBRG1	84897
218497_s_at	1.13573	0.019371	RNASEH1	246243
238987_at	1.23842	0.0193731	B4GALT1	2683
209445_x_at	1.25247	0.0193745	C7orf44	55744
233437_at	1.25711	0.0193781	GABRA4	2557
1554096_a_at	0.760927	0.0194113	RBM33	155435
215828_at	0.668987	0.0194327
200640_at	1.21632	0.0194478	YWHAZ	7534
238596_at	0.72565	0.0194585	FRA10AC1	118924
241501_at	0.717818	0.0195125
238315_s_at	0.769741	0.0195316	ZNF567	163081
221607_x_at	1.21065	0.0195415	ACTG1	71
232397_at	0.693766	0.0195453	LOC100507039	100507039
235009_at	0.51818	0.0195636	BOD1L	259282
239634_at	0.751447	0.0196238
225178_at	0.804568	0.0196992	TTC14	151613
201544_x_at	1.20294	0.0197074	PABPN1	8106
215144_at	1.20977	0.0197135
201499_s_at	1.15271	0.0197484	USP7	7874
214422_at	0.721058	0.0197686	RAD23B	5887
239469_at	0.741664	0.0198198
1554216_at	0.634684	0.0198303	CCDC132	55610
201663_s_at	1.29314	0.0198344	SMC4	10051
1557413_a_at	0.719164	0.0199142
211999_at	1.21788	0.0199174	H3F3B	3021
207017_at	0.646349	0.0199551	RAB27B	5874
219078_at	1.25964	0.0199758	GPATCH2	55105
243925_at	0.713231	0.0199781
213478_at	1.58869	0.0200085	KAZ	23254
202953_at	1.6034	0.0200382	C1QB	713
243031_at	0.787812	0.0200624
222368_at	0.736507	0.0200977
1559142_at	0.685691	0.0201085	MYST3	7994
230180_at	0.462945	0.0201378
219016_at	1.17921	0.0202039	FASTKD5	60493
231235_at	0.566199	0.0202158	NKTR	4820
206928_at	0.735103	0.0202164	ZNF124	7678
212708_at	1.24622	0.0202171	MSL1	339287
226229_s_at	1.33327	0.0202394	SSU72	29101
213965_s_at	0.716696	0.0202442	CHD5	26038
1558739_at	0.715439	0.0202548
231819_at	1.42479	0.0202874	LOC100505876	100505876
237869_at	1.30853	0.0202878	A2LD1	87769
207007_at	1.30575	0.0202885	NR1I3	9970
1553396_a_at	0.554659	0.02032	CCDC13	152206
238151_at	0.633239	0.0203656
209344_at	0.524528	0.020435	TPM4	7171
233359_at	0.779608	0.0204486
236645_at	0.56603	0.0204805	LOC100506312	100506312
1559426_at	0.798785	0.0205444
1554053_at	1.27382	0.020576	SPTLC1	10558
232587_at	1.27753	0.0206123	EML4	27436
212121_at	1.23436	0.0206192	TCTN3	26123
238430_x_at	0.704922	0.0206411	SLFN5	162394
243232_at	1.26317	0.0206444
236752_at	0.67272	0.0206474
209234_at	1.27653	0.0206772	KIF1B	23095
237075_at	1.53439	0.0207203	LOC100506762	100506762
1559566_at	0.825888	0.0207574	FBXO42	54455
241613_at	0.744034	0.0207686
227402_s_at	0.754925	0.0207757	UTP23	84294
225341_at	1.27424	0.0207788	MTERFD3	80298
209193_at	1.32505	0.0207835	PIM1	5292
1562619_at	1.26385	0.0207945	TXNDC6	347736
206551_x_at	0.804131	0.0207988	KLHL24	54800
227740_at	0.621793	0.0208129	UHMK1	127933
226587_at	0.697573	0.0208185	SNRPN	6638
243640_x_at	0.774812	0.0208202
202719_s_at	0.775867	0.0209015	TES	26136
205253_at	1.5082	0.0210031	PBX1	5087
209207_s_at	1.2223	0.0210169	SEC22B	9554
222688_at	0.83299	0.0210236	ACER3	55331
202957_at	1.22479	0.021032	HCLS1	3059
201964_at	1.21557	0.0210407	SETX	23064
1562004_x_at	1.3727	0.0210489	MYOZ3	91977
229520_s_at	0.708282	0.0210566	C14orf118	55668
238706_at	0.776512	0.0210794	PAPD4	167153
229832_x_at	1.30121	0.0211101	SH3TC1	54436
242887_at	0.845941	0.0211112	KCMF1	56888
233160_at	0.710533	0.021132	DEFB129	140881
203609_s_at	0.611874	0.0211469	ALDH5A1	7915
235435_at	0.795136	0.0211767	AASDH	132949
200609_s_at	1.22854	0.0212334	WDR1	9948
237494_at	1.43263	0.0212504
232940_s_at	0.696725	0.0212645	MLL3	58508
205220_at	1.4094	0.0212773	GPR109B	8843
208485_x_at	1.19559	0.0212824	CFLAR	8837
212767_at	1.37558	0.0213147	MTG1	92170
243064_at	0.698518	0.0213165
219236_at	1.79039	0.0213286	PAQR6	79957
235061_at	1.27844	0.0213708	PPM1K	152926
240928_at	0.84988	0.0213814	FCF1	51077
232127_at	0.717959	0.0214025	CLCN5	1184
242498_x_at	0.785158	0.0214355
51228_at	0.787695	0.0214558	RBM12B	389677
205548_s_at	1.30057	0.0214737	BTG3	10950
206654_s_at	0.585507	0.0215228	POLR3G	10622
236023_at	0.784372	0.0215631	CDK9	1025
239854_at	1.43701	0.0215648	C22orf41	644186
1553212_at	1.27109	0.0215764	KRT78	196374
225528_at	1.19385	0.0215812	IPO8	10526
234262_at	0.597123	0.0215841
201868_s_at	0.695653	0.0216151	TBL1X	6907
222045_s_at	1.39849	0.0216442	PCIF1	63935
222631_at	1.26177	0.0216504	PI4K2B	55300
244257_at	0.745694	0.021659
217742_s_at	1.16535	0.0216644	WAC	51322
206693_at	0.754409	0.021679	IL7	3574
244055_at	0.680949	0.0216874
216950_s_at	1.31456	0.0217119	FCGR1A /// FCGR1C	100132417 /// 2209
241106_at	0.762593	0.0217235
236251_at	0.758961	0.0217476
233803_s_at	1.49785	0.0217498	MYBBP1A	10514
233336_at	0.727058	0.0218082
233599_at	0.761489	0.021827	LOC728061	728061
205566_at	1.20639	0.0218559	ABHD2	11057
1558560_s_at	0.820234	0.0218854	BLZF1	8548
1569607_s_at	0.656203	0.021949	ANKRD20A1 /// ANKRD20A2 /// ANKRD20A3 /// ANKRD20A4 /// C21orf81 /// LOC100132733 /// LOC284232	100132733 /// 284232 /// 391267 /// 441425 /// 441430 /// 728747 /// 84210
242009_at	0.592029	0.0219735	SLC6A4	6532
240528_s_at	0.776745	0.0220268	EXOC4	60412
228119_at	0.744337	0.02203	LRCH3	84859
223916_s_at	0.63554	0.0220358	BCOR	54880
222508_s_at	0.586481	0.0220385	ARGLU1	55082
1557065_at	0.6261	0.0220441	YLPM1	56252
243108_at	0.757246	0.0220584	RANBP9	10048
201085_s_at	0.645768	0.0220965	SON	6651
208884_s_at	1.21553	0.022118	UBR5	51366
239954_at	0.774989	0.0221329	ZNF160	90338
242399_at	0.791404	0.0221482
231040_at	0.750465	0.0221573
1554912_at	0.827534	0.0222	ESYT3	83850
230423_at	1.29088	0.0222013
1566228_at	0.808475	0.0222059
212333_at	1.20573	0.0222109	FAM98A	25940
222449_at	0.711479	0.0222693	PMEPA1	56937
204249_s_at	1.23456	0.0223414	LMO2	4005
200689_x_at	1.24862	0.0223484	EEF1G	1937
226023_at	1.28351	0.0223583	MAP2K7	5609
205317_s_at	0.747534	0.0223671	SLC15A2	6565
234562_x_at	0.693954	0.0223845
222621_at	0.817975	0.0224127	DNAJC1	64215
214068_at	0.758129	0.0224312	BEAN1	146227
202738_s_at	1.17564	0.022456	PHKB	5257
227747_at	1.3	0.0224834	MPZL3	196264
225291_at	1.31957	0.0225235	PNPT1	87178
1556204_a_at	0.727181	0.0225522	LOC100507816 /// ZNF814	100507816 /// 730051
211386_at	0.793619	0.0225746	MGC12488	84786
220993_s_at	0.748952	0.0226155	GPR63	81491
200065_s_at	1.1824	0.022673	ARF1	375
1555476_at	1.21763	0.0226842	IREB2	3658
1555180_at	0.719982	0.0227212	LOC100132686	100132686
222280_at	0.757675	0.022731	LOC100506469	100506469
212305_s_at	1.17318	0.0227311	MIA3	375056
242112_at	0.664299	0.0227651	LSM11	134353
241331_at	0.738564	0.0227875	SKAP2	8935
205661_s_at	1.24179	0.0228014	FLAD1	80308
223078_s_at	0.735171	0.0228397	TMOD3	29766
212634_at	0.771164	0.022841	KIAA0776	23376
209024_s_at	0.746028	0.0228751	SYNCRIP	10492
1561906_at	1.28169	0.022893
244252_at	1.2256	0.0229128	LOC399884	399884
237975_at	0.755977	0.0229152	LOC100505986	100505986
1555021_a_at	1.18761	0.0229599	SCARF1	8578
211139_s_at	1.1953	0.0230154	NAB1	4664
227645_at	1.21711	0.0230512	PIK3R5	23533
1556362_at	0.708874	0.0231328
240568_at	0.692297	0.02315
1555856_s_at	1.31989	0.0231501
213214_x_at	1.19101	0.0231713	ACTG1	71
225720_at	1.22216	0.0233216	SYNPO2	171024
221471_at	1.17709	0.0233248	SERINC3	10955
235222_x_at	1.18037	0.0233331	XIAP	331
208869_s_at	1.18086	0.0233365	GABARAPL1	23710
235679_at	1.2004	0.0233638
236809_at	0.754124	0.0233647
229625_at	1.35231	0.0233837	GBP5	115362
220483_s_at	0.746551	0.0233856	RNF19A	25897
204314_s_at	0.808191	0.0234193	CREB1	1385
203214_x_at	1.58609	0.0234201	CDK1	983
220467_at	1.42321	0.0234224
217462_at	1.32015	0.023436	C11orf9	745
219630_at	1.57948	0.0234366	PDZK1IP1	10158
244390_at	1.25049	0.0234491
1565913_at	0.554304	0.0234603
206621_s_at	1.23924	0.0234627	EIF4H	7458
239163_at	0.707232	0.0234769	UBE2B	7320
203776_at	1.14987	0.0234845	GPKOW	27238
241824_at	0.610682	0.0234905
207128_s_at	0.829892	0.0235313	ZNF223	7766
208876_s_at	0.815003	0.0235313	PAK2	5062
225694_at	1.18859	0.0235348	CDK12	51755
228420_at	0.874602	0.0235599	PDCD2	5134
1562902_at	0.781485	0.0235647
217159_x_at	0.695104	0.0235696	SIGLEC7	27036
235301_at	1.55857	0.0235834	KIAA1324L	222223
203944_x_at	1.17963	0.023588	BTN2A1	11120
238705_at	0.720947	0.023596
202261_at	1.21022	0.0236027	VPS72	6944
202302_s_at	1.22917	0.0236264	RSRC2	65117
214657_s_at	1.65357	0.0236361	NEAT1	283131
239645_at	0.667247	0.0236646
244153_at	0.81832	0.0236712	ZNF207	7756
222408_s_at	1.26713	0.0236793	YPEL5	51646
1557227_s_at	0.445546	0.0237277	TPR	7175
1557388_at	0.735269	0.023735	RTTN	25914
233072_at	1.2771	0.0237944	NTNG2	84628
203853_s_at	1.28588	0.0238381	GAB2	9846
231009_at	1.25714	0.0238384	PLA2G12B	84647
220147_s_at	1.20555	0.0238485	FAM60A	58516
200911_s_at	1.16914	0.0238591	TACC1	6867
216941_s_at	0.801692	0.0238604	TAF1B	9014
1556750_at	1.22462	0.0238815	LOC153577	153577
202894_at	1.94515	0.0238962	EPHB4	2050
1554797_at	0.760453	0.0238972	SYT16	83851
239893_at	1.29729	0.0239439
241869_at	1.40737	0.0239626	APOL6	80830
225289_at	1.21363	0.0239673	STAT3	6774
214692_s_at	1.4233	0.0239747	JRK	8629
236732_at	0.666353	0.0239927
224496_s_at	0.810889	0.0240433	TMEM107	84314
234255_at	0.78614	0.0240444
236026_at	0.799913	0.0240613	GPATCH2	55105
226005_at	1.19359	0.0240762	UBE2G1	7326
239159_at	0.758801	0.0241249	GOSR2	9570
222740_at	1.24042	0.0241312	ATAD2	29028
242691_at	0.711044	0.024164
1570439_at	1.33904	0.0242039
208859_s_at	0.573864	0.0242092	ATRX	546
203689_s_at	1.19298	0.0242284	FMR1	2332
1556416_s_at	0.744677	0.0242991
241041_at	0.668282	0.0243081
1566700_at	1.27784	0.0243315	VRK3	51231
209824_s_at	1.21559	0.0243345	ARNTL	406
210561_s_at	1.21936	0.0243633	WSB1	26118
220998_s_at	1.3412	0.0243956	UNC93B1	81622
217990_at	1.22134	0.0244061	GMPR2	51292
216215_s_at	0.725733	0.0244136	RBFOX2	23543
241214_at	0.802489	0.0244437
224641_at	1.21866	0.0244754	FYTTD1	84248
244043_at	1.34568	0.0244876	TFDP2	7029
237106_at	0.760248	0.0244992	SLC11A2	4891
218782_s_at	1.2401	0.0244994	ATAD2	29028
212099_at	1.2404	0.0245183	RHOB	388
1552611_a_at	0.697187	0.0245316	JAK1	3716
215609_at	0.733028	0.0245456
222781_s_at	1.14927	0.0245597	C9orf40	55071
204669_s_at	1.4117	0.0245649	RNF24	11237
1554021_a_at	0.83517	0.0245781	ZNF12	7559
[truncated: 1,048 more rows]
