# Supplementary material for: Comparison of Blood RNA Extraction Methods Used for Gene Expression Profiling in Amyotrophic Lateral Sclerosis
Source: PLoS One. 2014 Jan 27;9(1):e87508. doi: 10.1371/journal.pone.0087508 (PMC3903649; doi:10.1371/journal.pone.0087508)
Supplement: Table S3 — List of statistically significant (pLikeValue <0.05) differentially regulated genes after PUMA analysis of TEMPUS GC samples (3619; FC, fold change). (XLSX) [file pone.0087508.s003.xlsx]

## Sheet: S3 TEM GC regulated genes
Probe Set ID	FC	pLikeValue	Gene Symbol	Entrez Gene
1563165_at	0.78337	0
240455_at	0.492249	0
244875_at	0.775174	1.89848e-14	ASMTL-AS	80161
201702_s_at	0.315419	5.41865e-11	PPP1R10	5514
219825_at	0.393545	1.10368e-10	CYP26B1	56603
227958_s_at	0.832521	4.78026e-10	GSN	2934
209013_x_at	0.281702	9.31607e-10	TRIO	7204
233305_at	0.695702	5.67839e-08	NECAB1	64168
224044_at	2.00014	8.76317e-08	RHOT1	55288
233118_at	0.555596	1.34368e-07
239823_at	2.29082	4.48982e-07
231458_at	0.539307	5.26993e-07
211720_x_at	0.662736	6.27176e-07	RPLP0	6175
1561937_x_at	1.76574	8.7734e-07
206310_at	0.583797	1.16625e-06	SPINK2	6691
1562568_at	0.672195	1.21787e-06	LOC400541	400541
222831_at	0.340813	1.28786e-06	SAP30L	79685
217159_x_at	0.474526	1.71384e-06	SIGLEC7	27036
216910_at	2.37007	1.83008e-06	XPNPEP2	7512
207569_at	2.102	1.87617e-06	ROS1	6098
207449_s_at	1.93647	2.16101e-06	POFUT2	23275
201033_x_at	0.671005	2.23123e-06	RPLP0	6175
1567139_at	0.574389	2.33976e-06
208059_at	1.63664	2.40964e-06	CCR8	1237
202347_s_at	0.731335	2.43754e-06	UBE2K	3093
208856_x_at	0.662671	2.61448e-06	RPLP0	6175
213655_at	0.634541	3.11638e-06	YWHAE	7531
238101_at	0.634441	3.42256e-06	BEND4	389206
1562028_at	0.436624	3.94206e-06	CCND3	896
240132_at	0.821213	4.53078e-06
217572_at	0.614658	4.74601e-06
218780_at	2.14532	4.99653e-06	HOOK2	29911
221475_s_at	0.657602	5.59185e-06	RPL15	6138
238519_at	0.688723	6.14804e-06	DDI2	84301
228110_x_at	2.16747	7.07957e-06
203945_at	0.624139	7.24011e-06	ARG2	384
240474_x_at	0.606273	7.31201e-06
1570336_at	0.745672	7.71352e-06	BDH1	622
1569500_at	2.32481	8.12656e-06
225489_at	0.639919	8.19669e-06	TMEM18	129787
205413_at	0.392171	9.50688e-06	MPPED2	744
234815_at	0.640735	1.02089e-05
228529_at	2.41038	1.09646e-05	NAA38	51691
231430_at	0.685099	1.10568e-05	FAM181B	220382
221283_at	0.653568	1.1992e-05	RUNX2	860
237746_at	1.85795	1.2724e-05	SFRS11	9295
40093_at	1.88689	1.28405e-05	BCAM	4059
1556265_at	1.98185	1.48151e-05	C20orf202	400831
222877_at	0.597199	1.48238e-05
200633_at	0.600472	1.60733e-05	UBB	7314
202376_at	0.698392	1.9171e-05	SERPINA3	12
213588_x_at	0.707899	1.92677e-05	RPL14	9045
213695_at	0.746872	2.05163e-05	PON3	5446
217362_x_at	0.571347	2.10982e-05	HLA-DRB6	3128
243346_at	0.539111	2.53636e-05	LMOD3	56203
1561895_at	0.658548	2.88718e-05
202524_s_at	0.650507	2.94154e-05	SPOCK2	9806
221798_x_at	0.647213	2.95863e-05
232535_at	0.63305	3.02082e-05
206454_s_at	0.626238	3.03427e-05	RHO	6010
232354_at	2.00563	3.11071e-05
212098_at	0.746865	3.49225e-05	LOC151162 /// MGAT5	151162 /// 4249
200062_s_at	0.702332	3.66927e-05	RPL30	6156
200933_x_at	0.697661	3.81124e-05	RPS4X	6191
206252_s_at	0.595462	3.86933e-05	AVPR1A	552
215157_x_at	0.73326	3.90386e-05	PABPC1	26986
1558871_at	0.581837	3.92769e-05
212062_at	0.598558	3.9632e-05	ATP9A	10079
1554867_a_at	0.63836	4.02548e-05	PRR16	51334
206499_s_at	0.605558	4.0416e-05	RCC1	1104
223049_at	0.703979	4.0487e-05	GRB2	2885
216073_at	0.613876	4.05224e-05	ANKRD34C	390616
205696_s_at	0.579418	4.08902e-05	GFRA1	2674
234089_at	0.602018	4.16198e-05
203034_s_at	0.751919	4.52179e-05	RPL27A	6157
214351_x_at	0.738395	4.85496e-05	RPL13	6137
210774_s_at	0.738154	5.1037e-05	NCOA4	8031
239601_at	1.61654	5.25747e-05
229722_at	1.87874	5.34819e-05	LOC100270804	100270804
1569076_a_at	0.4959	5.52349e-05	ZNF836	162962
212039_x_at	0.691055	5.62673e-05	RPL3	6122
216971_s_at	0.679283	5.66106e-05	PLEC	5339
1562270_at	0.65609	5.97766e-05	ARHGEF7	8874
216659_at	0.586092	6.07926e-05	LOC1720	1720
217427_s_at	0.582731	6.29807e-05	HIRA	7290
211345_x_at	0.701074	6.30681e-05	EEF1G	1937
206533_at	0.603949	6.46323e-05	CHRNA5	1138
211296_x_at	0.707179	6.48642e-05	UBC	7316
243994_at	0.6482	6.67611e-05
1562903_at	0.644733	6.68759e-05	FLJ10661	286042
232322_x_at	0.540085	6.72496e-05	STARD10	10809
205311_at	0.736683	6.73955e-05	DDC	1644
215729_s_at	0.652414	6.95412e-05	VGLL1	51442
232803_at	1.53381	7.09144e-05	FLJ31958	143153
201429_s_at	0.693124	7.18152e-05	RPL37A	6168
239813_at	0.566871	7.22969e-05	IQCH	64799
218876_at	0.548039	8.08194e-05	TPPP3	51673
37965_at	1.60226	9.24044e-05	PARVB	29780
205685_at	0.72749	9.46715e-05	CD86	942
217848_s_at	0.686995	9.47168e-05	PPA1	5464
221097_s_at	0.645968	9.56327e-05	KCNMB2	10242
218243_at	0.653154	0.000100379	RUFY1	80230
237743_at	0.645987	0.000101293
210464_at	0.701502	0.000103637	C8orf71	26138
216863_s_at	0.760076	0.000106053	MORC2	22880
225802_at	0.672719	0.000108778	TOP1MT	116447
204892_x_at	0.744743	0.00010922	EEF1A1	1915
1561951_at	0.647606	0.000111997	SLC5A12	159963
211927_x_at	0.699467	0.000115195	EEF1G	1937
240982_at	0.747512	0.000123927	CARS	833
233334_x_at	1.94267	0.00012789	SLX1A /// SLX1B /// SULT1A3 /// SULT1A4	445329 /// 548593 /// 6818 /// 79008
222264_at	0.594549	0.000130377	HNRNPUL2	221092
225004_at	0.687965	0.000132912	TMEM101	84336
235582_at	2.47216	0.000134419	E2F2	1870
212415_at	0.730929	0.000136857	SEP6	23157
221518_s_at	0.720406	0.000137704	USP47	55031
241478_at	0.554219	0.000137739	MICALL2	79778
224965_at	0.648411	0.000140823	GNG2	54331
1552580_at	0.850135	0.000148712	TRIML2	205860
237598_at	0.627384	0.000149021	SEC1	653677
200651_at	0.695269	0.000156943	GNB2L1	10399
214014_at	0.57147	0.000158071	CDC42EP2	10435
227841_at	0.597488	0.000163458	AMDHD2	51005
200809_x_at	0.707652	0.000166151	RPL12	6136
201049_s_at	0.694755	0.0001666	RPS18	6222
213166_x_at	0.689935	0.000167568	MZT2A	653784
201254_x_at	0.718658	0.000170018	RPS6	6194
213801_x_at	0.705368	0.000172263	RPSA	3921
200095_x_at	0.680009	0.000174477	RPS10	6204
243072_at	1.81038	0.000174543
1561236_at	0.685527	0.000177292
232948_at	1.81397	0.000180441
224298_s_at	0.734519	0.000181751	UBAC2	337867
230397_at	0.435166	0.000187764	SAR1B	51128
224930_x_at	0.711416	0.00018835	RPL7A	6130
212433_x_at	0.748348	0.000190464	RPS2	6187
225550_at	0.738252	0.000194903	CNST	163882
218276_s_at	0.729029	0.0001958	SAV1	60485
224639_at	0.797254	0.000195852	SPPL3	121665
201522_x_at	0.773274	0.000198056	SNRPN /// SNURF	6638 /// 8926
211073_x_at	0.713956	0.000199555	RPL3	6122
203575_at	0.715106	0.000199649	CSNK2A2	1459
224372_at	0.664396	0.00020651	DCAF6 /// ND4	4538 /// 55827
239549_at	2.20038	0.000210311
1559675_at	1.56416	0.000210898
211940_x_at	0.707287	0.000212705	H3F3A /// LOC440926	3020 /// 440926
213736_at	0.596983	0.000215104	COX5B	1329
208645_s_at	0.717584	0.000215314	RPS14	6208
211972_x_at	0.715281	0.000217531	RPLP0	6175
203107_x_at	0.728404	0.000218005	RPS2	6187
201010_s_at	0.719236	0.000218023	TXNIP	10628
207659_s_at	0.666553	0.00021804	MOBP	4336
200912_s_at	0.790962	0.000219409	EIF4A2	1974
221700_s_at	0.694071	0.000219909	UBA52	7311
208929_x_at	0.713866	0.000238075	RPL13	6137
1564144_at	0.797896	0.000238126
219670_at	0.532391	0.000240266	BEND5	79656
205433_at	0.716011	0.000240299	BCHE	590
243517_at	0.596555	0.000240854
201152_s_at	0.809684	0.000243098	MBNL1	4154
238705_at	0.582054	0.000249028
223107_s_at	0.721912	0.000251434	ZCCHC17	51538
216442_x_at	0.360146	0.000251523	FN1	2335
213890_x_at	0.73793	0.000252016	RPS16	6217
201217_x_at	0.720623	0.00025938	RPL3	6122
1568593_a_at	0.655324	0.000260149	NUDT16P1	152195
217286_s_at	0.75486	0.000263129	NDRG3	57446
234004_at	1.52504	0.000263201	TTC28	23331
217171_at	0.569869	0.000264576	SMPD1	6609
223717_s_at	0.661888	0.000265424	ACRBP	84519
205759_s_at	0.574932	0.000265734	SULT2B1	6820
1562852_at	0.589854	0.000268771
200716_x_at	0.703175	0.000270765	RPL13A	23521
231260_at	0.580329	0.000272997	LOC386758	386758
211542_x_at	0.650689	0.000273311	RPS10	6204
239363_at	0.734773	0.000279302
202942_at	0.753599	0.000281526	ETFB	2109
226175_at	0.801623	0.000287326	TTC9C	283237
238196_at	0.688147	0.000288018	LOC285095	285095
231623_at	0.851277	0.00029007	TMEM174	134288
200689_x_at	0.703102	0.000290318	EEF1G	1937
205938_at	0.679705	0.0002938	PPM1E	22843
224738_x_at	0.809595	0.000300941	RPL7L1	285855
214307_at	0.614048	0.00030134	HGD	3081
239817_at	0.586579	0.000306629
233616_at	0.649649	0.000312963
212596_s_at	0.789212	0.000316572	HMGXB4	10042
212734_x_at	0.717944	0.000319191	RPL13	6137
213828_x_at	0.705982	0.000329287	H3F3A /// LOC440926	3020 /// 440926
231045_x_at	0.750677	0.000330184	C11orf31	280636
1561223_at	0.489766	0.000331365
217740_x_at	0.749149	0.0003452	RPL7A	6130
214317_x_at	0.727802	0.000348691	RPS9	6203
232617_at	0.745658	0.000352355	CTSS	1520
200773_x_at	0.821297	0.00035254	PTMA	5757
213377_x_at	0.726614	0.000356398	RPS12	6206
205920_at	1.66217	0.000357123	SLC6A6	6533
212790_x_at	0.713863	0.000361851	RPL13A	23521
202144_s_at	0.758978	0.000362557	ADSL	158
200088_x_at	0.715063	0.000367696	RPL12	6136
212480_at	0.486447	0.000375477	SPECC1L	23384
230574_at	0.56459	0.000378999	LOC100130938	100130938
230811_at	0.531926	0.000382523	C16orf55	124045
201009_s_at	0.726829	0.000392877	TXNIP	10628
203971_at	0.728516	0.000395708	SLC31A1	1317
207604_s_at	0.640758	0.000398231	SLC4A7	9497
238874_at	0.662104	0.00040191	LOC100506860	100506860
208970_s_at	0.784467	0.000401946	UROD	7389
235438_at	1.60583	0.000407555
201810_s_at	0.717955	0.000407585	SH3BP5	9467
213653_at	1.36451	0.00041602	METTL3	56339
200018_at	0.761403	0.000416752	RPS13	6207
238885_at	0.606491	0.0004186	KIAA1549	57670
202409_at	2.0502	0.000419814	IGF2 /// INS-IGF2	3481 /// 723961
228857_at	0.650787	0.000422808	GNL1	2794
210646_x_at	0.720918	0.00042607	RPL13A	23521
1569105_at	1.6817	0.000433077	SETD5	55209
222062_at	0.717311	0.000437615	IL27RA	9466
228542_at	0.615012	0.000439326	MRS2	57380
217747_s_at	0.709318	0.00044016	RPS9	6203
222302_at	1.47736	0.000445532	LOC100507009	100507009
224677_x_at	0.712017	0.000454454	C11orf31	280636
242698_at	0.718364	0.000455079	AKAP14	158798
217648_at	0.519661	0.000455423
231381_at	2.51802	0.000465889	ESRG	790952
227825_at	0.693782	0.000479863	NAIF1	203245
200863_s_at	0.804585	0.000480486	RAB11A	8766
214313_s_at	0.602386	0.000484101	EIF5B	9669
225771_at	0.735506	0.000485736	AP1G1	164
226017_at	0.732871	0.000490052	CMTM7	112616
202641_at	0.740498	0.00049059	ARL3	403
225190_x_at	0.698311	0.000491763	RPL35A	6165
200725_x_at	0.728844	0.000493707	RPL10	6134
200036_s_at	0.73136	0.000503469	RPL10A	4736
242353_at	0.697087	0.000504781
201592_at	0.728064	0.00050491	EIF3H	8667
208614_s_at	0.672981	0.000505263	FLNB	2317
236380_at	0.630384	0.000508544
214369_s_at	0.769898	0.000510471	RASGRP2	10235
50965_at	1.50069	0.00051783	RAB26	25837
236820_at	1.93489	0.000523062
211442_x_at	0.659881	0.000523262	CYP3A43	64816
215963_x_at	0.763538	0.000528326	RPL3	6122
218228_s_at	0.652573	0.000535947	TNKS2	80351
200077_s_at	0.772657	0.000540563	OAZ1	4946
212130_x_at	0.735926	0.000540885	EIF1	10209
1560359_at	0.691255	0.000542972	PELO	53918
223926_at	0.690623	0.00055228	KIF2B	84643
200029_at	0.72841	0.000553696	RPL19	6143
200858_s_at	0.78483	0.00055408	RPS8	6202
208646_at	0.73331	0.000564964	RPS14P3	644068
227983_at	0.781682	0.000567594	RILPL2	196383
211956_s_at	0.752739	0.000568147	EIF1	10209
214049_x_at	0.587311	0.000571826	CD7	924
207339_s_at	0.701765	0.000573039	LTB	4050
205562_at	0.742051	0.000576764	RPP38	10557
225276_at	0.74231	0.000577375	GSPT1	2935
228967_at	0.734113	0.000585549	EIF1	10209
229670_at	0.763552	0.000589816
212869_x_at	0.724668	0.000594599	TPT1	7178
235564_at	1.45335	0.000598771	ZNF117	51351
211970_x_at	0.771249	0.000601523	ACTG1	71
233586_s_at	0.620216	0.000601704	KLK12	43849
239411_at	1.70353	0.000610704
203085_s_at	0.710212	0.00061313	TGFB1	7040
1554296_at	0.955784	0.000619952	CYP19A1	1588
1566176_at	0.627757	0.000626735
1556389_at	0.72993	0.000628148	CNPY3	10695
203984_s_at	0.76655	0.000631632	CASP9	842
201470_at	0.743657	0.000637782	GSTO1	9446
229012_at	0.671958	0.000639041	C9orf24	84688
223009_at	0.761819	0.000639383	C11orf59	55004
227396_at	0.755844	0.000648995	PTPRJ	5795
213726_x_at	0.720678	0.000649252	TUBB2C	10383
230012_at	0.73024	0.000652988	C17orf44	284029
215826_x_at	0.665775	0.00066296	ZNF835	90485
208119_s_at	0.731183	0.000667636	ZNF93	81931
213141_at	0.724226	0.000672708	PSKH1	5681
1569859_at	0.750216	0.000677226
200092_s_at	0.755257	0.000683718	RPL37	6167
1554822_at	1.68934	0.000683788	PHTF2	57157
200830_at	0.741602	0.000684322	PSMD2	5708
212071_s_at	0.781784	0.000684442	SPTBN1	6711
202882_x_at	0.811836	0.000689251	NOL7	51406
213969_x_at	0.744979	0.000690964	RPL29	6159
1553570_x_at	0.750482	0.000693217	COX2	4513
214280_x_at	0.782832	0.000693456	HNRNPA1	3178
224653_at	0.768393	0.000699271	EIF4EBP2	1979
230439_at	0.636432	0.000703414	LOC389458	389458
207165_at	1.69565	0.000717808	HMMR	3161
241782_at	0.633399	0.000722912	NEBL	10529
227249_at	0.797166	0.000724487	NDE1	54820
1564357_at	0.685997	0.000730696	ABHD12B	145447
204357_s_at	0.617165	0.000752409	LIMK1	3984
219155_at	0.776425	0.000755837	PITPNC1	26207
213491_x_at	0.776757	0.000758645	RPN2	6185
219803_at	1.44443	0.000759817	ANGPTL3	27329
230833_at	0.609203	0.000760855	ACRBP	84519
200752_s_at	0.681797	0.000764161	CAPN1	823
204502_at	0.771772	0.000765482	SAMHD1	25939
225177_at	0.740378	0.000766209	RAB11FIP1	80223
217414_x_at	0.616404	0.000769268	HBA1 /// HBA2	3039 /// 3040
214167_s_at	0.741909	0.000769485	RPLP0 /// RPLP0P6	220717 /// 6175
204681_s_at	0.622764	0.000788676	RAPGEF5	9771
221496_s_at	0.499549	0.000797303	TOB2	10766
226997_at	0.684789	0.000801927	ADAMTS12	81792
223183_at	0.736098	0.00081404	AGPAT3	56894
217809_at	0.759078	0.000817768	BZW2	28969
208755_x_at	0.756257	0.00081814	H3F3A /// LOC440926	3020 /// 440926
216231_s_at	0.742488	0.000821586	B2M	567
237254_at	0.652009	0.00082584	SLC5A11	115584
200763_s_at	0.757749	0.00085303	RPLP1	6176
216269_s_at	0.676993	0.000860568	ELN	2006
224637_at	0.712068	0.000861242	OST4	100128731
200019_s_at	0.696146	0.000862356	FAU	2197
243282_at	1.57549	0.000867913	CCDC93	54520
212788_x_at	0.721383	0.000868556	FTL	2512
212191_x_at	0.705037	0.000872386	RPL13	6137
200936_at	0.740221	0.000884319	RPL8	6132
204097_s_at	0.774705	0.000898195	RBMX2	51634
229410_at	0.795036	0.000905526	SLC35E1	79939
226777_at	0.680002	0.000906651	ADAM12	8038
237886_at	0.673122	0.00091702
213574_s_at	0.711595	0.00091783
1554408_a_at	1.69461	0.000920815	TK1	7083
200926_at	0.714427	0.000926644	RPS23	6228
221135_s_at	0.729413	0.000929922	ASTE1	28990
207897_at	1.56075	0.000930502	CRHR2	1395
228305_at	0.803592	0.000930764	ZNF565	147929
201425_at	0.738851	0.000937602	ALDH2	217
201954_at	0.714023	0.000938282	ARPC1B	10095
231200_at	0.693442	0.000942731	LSM14B	149986
227608_at	0.759331	0.000948501	YY1AP1	55249
227338_at	0.728832	0.000949953	LOC440983	440983
210424_s_at	1.98376	0.000956017	GOLGA8A /// GOLGA8B	23015 /// 440270
202217_at	0.791468	0.00097262	C21orf33	8209
220902_at	0.674054	0.000975459
200909_s_at	0.730259	0.000979315	RPLP2	6181
202154_x_at	0.652373	0.000981372	TUBB3	10381
221799_at	0.69852	0.000983193	CHPF2	54480
226027_at	0.751785	0.000984601	C9orf119	375757
211180_x_at	0.655454	0.000986883	RUNX1	861
207366_at	0.787133	0.000993538	KCNS1	3787
239046_at	0.664463	0.00100065
213347_x_at	0.715292	0.00100321	RPS4X	6191
209134_s_at	0.72627	0.00100336	RPS6	6194
1562853_x_at	0.78944	0.00100379
214271_x_at	0.763892	0.00101204	RPL12	6136
65585_at	0.718533	0.00101301	FAM86B1	85002
202713_s_at	0.770404	0.00102066	KIAA0391	9692
1553588_at	0.772032	0.00102516	ND3 /// SH3KBP1	30011 /// 4537
218321_x_at	0.764619	0.00103513	STYXL1	51657
201258_at	0.721546	0.00103798	RPS16	6217
212655_at	0.769458	0.00104658	ZCCHC14	23174
237655_at	1.45549	0.00105222
225534_at	0.71763	0.00106436	C8orf40	114926
202649_x_at	0.72133	0.00107228	RPS19	6223
242799_at	0.667163	0.00107363
208406_s_at	0.68253	0.00108432	GRAP2	9402
219456_s_at	0.689115	0.00108945	RIN3	79890
209384_at	0.750128	0.0010899	PROSC	11212
225935_at	0.733405	0.00109747	CUX1	1523
200817_x_at	0.713204	0.00110852	RPS10	6204
208977_x_at	0.71919	0.00110976	TUBB2C	10383
233186_s_at	0.725259	0.00111465	BANP	54971
200081_s_at	0.733668	0.0011337	RPS6	6194
211943_x_at	0.762368	0.00113373	TPT1	7178
213542_at	0.536065	0.00114457	ZNF710	374655
233349_at	0.621531	0.00114638	TLK2	11011
210569_s_at	0.496272	0.0011467	SIGLEC9	27180
1556170_at	1.50819	0.00114682
217033_x_at	1.38114	0.00114928	NTRK3	4916
224688_at	0.773092	0.00115847	C7orf42	55069
222388_s_at	0.805015	0.00115994	VPS35	55737
232983_s_at	0.739062	0.00116325	SERGEF	26297
206110_at	0.538112	0.00116579	HIST1H3H	8357
200031_s_at	0.739694	0.00116702	RPS11	6205
219609_at	0.536327	0.0011694	WDR25	79446
218286_s_at	0.75271	0.00117059	RNF7	9616
202926_at	0.735744	0.00117993	NBAS	51594
209191_at	0.600572	0.00119541	TUBB6	84617
221607_x_at	0.767201	0.0012078	ACTG1	71
1556003_a_at	0.690053	0.0012117	LOC100506777	100506777
226087_at	0.726554	0.00121247	LZIC	84328
242851_at	0.754483	0.00121882	KIAA1919	91749
238237_at	0.718152	0.00122428	LOC100507454	100507454
237202_at	0.567623	0.00123054	PGPEP1	54858
243969_at	0.704339	0.0012326	SLC24A4	123041
213350_at	0.613612	0.00123452	RPS11	6205
240449_at	0.736703	0.00123612	ZNF341	84905
231604_at	0.613291	0.00123956
240779_at	0.713123	0.00124175
205967_at	0.698275	0.00124309	HIST1H4C	8364
232205_at	1.93663	0.00126295
230619_at	0.709886	0.00126343	ARNT	405
200632_s_at	0.764757	0.00126947	NDRG1	10397
201966_at	0.75717	0.00126993	NDUFS2	4720
1560765_a_at	1.51008	0.00128089	ARHGAP22	58504
208306_x_at	0.771309	0.00128495	HLA-DRB1	3123
231961_at	0.675065	0.00129481	RBPMS	11030
204808_s_at	0.781127	0.00130143	TMEM5	10329
213414_s_at	0.723722	0.00130767	RPS19	6223
235727_at	0.661147	0.00131009	KLHL28	54813
211983_x_at	0.787713	0.00131151	ACTG1	71
203509_at	0.712317	0.0013183	SORL1	6653
222655_s_at	0.774539	0.00132082	IMPAD1	54928
235657_at	0.678417	0.00132188
233380_s_at	0.710875	0.00133128	RUFY1	80230
242783_at	1.52052	0.00133493
201793_x_at	0.580349	0.00134109	SMG7	9887
233918_at	0.666335	0.00135179	DCDC2B	149069
225422_at	0.750013	0.00135638	CDC26	246184
227182_at	0.731949	0.00136286	SUSD3	203328
243232_at	0.757207	0.001367
239755_at	1.75962	0.00137628
201892_s_at	0.728503	0.00139901	IMPDH2	3615
224585_x_at	0.769834	0.00140533	ACTG1	71
212424_at	0.658492	0.00141821	PDCD11	22984
208086_s_at	0.732776	0.00141917	DMD	1756
200797_s_at	0.792148	0.00142021	MCL1	4170
223741_s_at	0.749339	0.00142308	TTYH2	94015
243889_at	0.64443	0.00142632
202803_s_at	0.67033	0.00143169	ITGB2	3689
200819_s_at	0.7218	0.00143782	RPS15	6209
200807_s_at	0.791981	0.0014398	HSPD1	3329
1553569_at	0.763071	0.00144891	COX2	4513
1565527_x_at	0.50355	0.00145217	TCP11L2	255394
200812_at	0.775661	0.00145229	CCT7	10574
200735_x_at	0.760239	0.00145837	NACA	4666
238417_at	0.806581	0.00146143	PGM2L1	283209
204087_s_at	0.546806	0.00146259	SLC5A6	8884
232234_at	0.73693	0.00146533	SLA2	84174
210438_x_at	0.782571	0.0014678	TROVE2	6738
1557170_at	0.728353	0.00147815	NEK8	284086
228694_at	0.791591	0.00148157
229590_at	0.759208	0.00148271	RPL13	6137
212578_x_at	0.680244	0.00149299	LOC100505503 /// RPS17	100505503 /// 6218
242394_at	0.702006	0.00149374	CNKSR3	154043
226091_s_at	0.784768	0.0014983	MRFAP1	93621
217718_s_at	0.765464	0.00150025	YWHAB	7529
201550_x_at	0.742918	0.00150548	ACTG1	71
227893_at	0.558616	0.00151799	C9orf130	100128782
207206_s_at	0.67087	0.00152829	ALOX12	239
211710_x_at	0.7151	0.0015288	RPL4	6124
202021_x_at	0.743857	0.00154303	EIF1	10209
201305_x_at	0.793648	0.00154777	ANP32B	10541
233839_at	0.702194	0.00154905	EFCAB6	64800
201841_s_at	0.545378	0.00154947	HSPB1	3315
1562446_at	0.670801	0.00155279	ZNF391	346157
201093_x_at	0.823141	0.00155311	SDHA	6389
212999_x_at	2.56509	0.00155997	HLA-DQB1	3119
1559849_at	0.651661	0.00156294	ZNF605	100289635
218200_s_at	0.677731	0.00157027	NDUFB2	4708
244024_at	0.763501	0.00159049	ZNF182	7569
210332_at	0.675729	0.00159416	ACHE	43
238119_at	1.55314	0.00159923
240456_at	0.647756	0.00160458	ANKRD55	79722
200964_at	0.753764	0.0016177	UBA1	7317
213476_x_at	0.524571	0.00162468	TUBB3	10381
229068_at	0.770123	0.00167276	CCT5	22948
222400_s_at	0.743097	0.00167646	ADI1	55256
238716_at	0.48612	0.00168311	FAM85A	619423
200057_s_at	0.778354	0.00170264	NONO	4841
220960_x_at	0.787207	0.00171995	RPL22	6146
227601_at	0.747816	0.00172245	METTL14	57721
208904_s_at	0.750803	0.00173888	RPS28	6234
200823_x_at	0.7141	0.00173981	RPL29	6159
1554342_s_at	0.809683	0.00175095	HELQ	113510
218882_s_at	0.802415	0.00176271	WDR3	10885
200910_at	0.739278	0.0017653	CCT3	7203
238865_at	0.747999	0.00176633	PABPC4L	132430
204118_at	0.728807	0.00176637	CD48	962
1563250_at	1.47851	0.00176674
228928_x_at	0.753951	0.00176743	BANP	54971
214223_at	0.733448	0.00176941
1565681_s_at	1.70704	0.00177126	DIP2C	22982
1557016_a_at	0.633837	0.00178766	C1orf177	163747
224452_s_at	0.783724	0.00180413	C7orf70	84792
215075_s_at	0.679337	0.00180452	GRB2	2885
1553957_at	0.797791	0.00182064	ZNF564	163050
207389_at	0.726307	0.00182574	GP1BA	2811
226666_at	0.776223	0.00183351	DAAM1	23002
227299_at	0.642013	0.0018357	CCNI	10983
225669_at	0.719057	0.00184408	IFNAR1	3454
200875_s_at	0.769407	0.00184849	NOP56	10528
201913_s_at	0.73302	0.00184964	COASY	80347
208692_at	0.780047	0.001867	RPS3	6188
208517_x_at	0.742535	0.00187287	BTF3	689
241310_at	0.65305	0.00187575
201303_at	0.78603	0.00188134	EIF4A3	9775
1565358_at	0.756587	0.00188142	RARA	5914
224815_at	0.765456	0.00188608	COMMD7	149951
225655_at	1.53421	0.0018876	UHRF1	29128
242722_at	0.560618	0.00189255	LMO7	4008
1552880_at	1.35988	0.0018963	SEC16B	89866
201036_s_at	0.804645	0.00189657	HADH	3033
1552261_at	0.673473	0.00190276	WFDC2	10406
200997_at	0.78466	0.00191897	RBM14 /// RBM4	10432 /// 5936
209336_at	0.762588	0.00193956	PWP2	5822
224711_at	0.8201	0.00194056	YY1	7528
201270_x_at	0.764454	0.00194718	NUDCD3	23386
214431_at	0.759469	0.00195267	GMPS	8833
90265_at	0.771284	0.00195816	ADAP1	11033
212933_x_at	0.782081	0.00196672	RPL13	6137
1560019_at	1.65465	0.00197335	MGC11082	84777
207943_x_at	1.34661	0.00197452	PLAGL1	5325
202657_s_at	0.770677	0.00198666	SERTAD2	9792
1565895_at	1.62371	0.00198894
236160_at	0.765463	0.00200094	TRIP11	9321
234269_at	0.668999	0.00200245
234873_x_at	0.815025	0.00200788	RPL7A	6130
202698_x_at	0.719059	0.00201077	COX4I1	1327
204243_at	0.785168	0.00201578	RLF	6018
227461_at	0.694219	0.00202231	STON2	85439
1555326_a_at	1.76641	0.00202776	ADAM9	8754
201154_x_at	0.714978	0.00204787	RPL4	6124
213021_at	0.802537	0.0020528	GOSR1	9527
226082_s_at	0.711147	0.00205624	SFRS15	57466
1552307_a_at	0.691996	0.00206223	TTC39C	125488
210021_s_at	0.694964	0.0020632	CCNO	10309
55093_at	0.743266	0.00206494	CHPF2	54480
222565_s_at	0.71094	0.00207502	PRKD3	23683
200971_s_at	0.79472	0.00207682	SERP1	27230
208906_at	0.666015	0.00207757	BSCL2	26580
200849_s_at	0.737395	0.00208407	AHCYL1	10768
1556889_s_at	0.681476	0.00209529
1560723_at	0.678369	0.0021018	LOC283731	283731
206283_s_at	0.724919	0.00210537	TAL1	6886
1559149_at	0.793764	0.00211243
219528_s_at	0.763085	0.0021152	BCL11B	64919
231807_at	0.684919	0.00212419	KIAA1217	56243
200715_x_at	0.758925	0.00212561	RPL13A	23521
221726_at	0.757459	0.00212746	RPL22	6146
217719_at	0.757437	0.00213202	EIF3L	51386
229183_at	0.675813	0.00213352	KCTD1	284252
200022_at	0.734809	0.00214183	RPL18	6141
225196_s_at	0.748034	0.002143	MRPS26	64949
217914_at	0.698887	0.00214804	TPCN1	53373
1554078_s_at	0.826622	0.00216235	DNAJA3	9093
200674_s_at	0.715826	0.00216496	RPL32	6161
201732_s_at	0.631159	0.00217472	CLCN3	1182
208812_x_at	0.728577	0.00218068	HLA-C	3107
208895_s_at	0.753236	0.00218682	DDX18	8886
209489_at	0.77615	0.00218999	CELF1	10658
1561341_at	0.663584	0.00219446
234978_at	0.75549	0.00221048	SLC36A4	120103
207007_at	0.71212	0.0022172	NR1I3	9970
216639_at	0.739681	0.00222481	SRPX2	27286
226643_s_at	0.654327	0.00222687	NUDCD2	134492
221638_s_at	1.87077	0.00223273	STX16	8675
208752_x_at	0.788191	0.00223474	NAP1L1	4673
208635_x_at	0.773925	0.00223528	NACA	4666
217942_at	0.781643	0.00224027	MRPS35	60488
210266_s_at	0.787359	0.00224647	TRIM33	51592
233679_at	0.606422	0.00224651	TAB1	10454
224232_s_at	0.746302	0.00224855	PRELID1	27166
201492_s_at	0.657207	0.00225201	RPL41	6171
222942_s_at	0.309763	0.00226438	TIAM2	26230
234030_at	0.727507	0.00226699
203113_s_at	0.690152	0.00228006	EEF1D	1936
218253_s_at	0.773441	0.00228979	LGTN	1939
227493_s_at	0.712966	0.00229387	KIAA1143	57456
213477_x_at	0.792681	0.00229397	EEF1A1	1915
205130_at	0.706223	0.00229598	RAGE	5891
220073_s_at	0.66889	0.00230277	PLEKHG6	55200
230264_s_at	0.730407	0.00230624	AP1S2	8905
200053_at	0.768554	0.00230862	SPAG7	9552
244300_at	0.715494	0.00231167
208696_at	0.777895	0.0023121	CCT5	22948
AFFX-hum_alu_at	0.65973	0.00231995
219063_at	0.70089	0.00233166	C1orf35	79169
213084_x_at	0.769189	0.00234291	RPL23A	6147
226712_at	0.77582	0.00234317	SSR1	6745
220964_s_at	0.764359	0.00235185	RAB1B	81876
1553047_at	1.4422	0.00235187	PIP4K2B	8396
205672_at	0.725417	0.00235327	XPA	7507
223246_s_at	0.672827	0.0023551	STRBP	55342
203391_at	0.699451	0.00235635	FKBP2	2286
208616_s_at	0.827566	0.00236535	PTP4A2	8073
1564138_at	1.23289	0.0023681	FBXW12	285231
212318_at	0.719201	0.00237561	TNPO3	23534
212952_at	0.672938	0.00238512	LOC100507328	100507328
234302_s_at	0.740496	0.00238745	ALKBH5	54890
208332_at	1.79515	0.00239235	PRY	9081
212227_x_at	0.750815	0.00240108	EIF1	10209
201885_s_at	0.767432	0.00241411	CYB5R3	1727
218189_s_at	0.755668	0.00241763	NANS	54187
217514_at	0.648113	0.00243192
203358_s_at	1.38014	0.00244298	EZH2	2146
226131_s_at	0.818977	0.00245554	RPS16	6217
212988_x_at	0.774891	0.00245921	ACTG1	71
228708_at	0.685528	0.00245926	RAB27B	5874
213584_s_at	1.39348	0.00247649	CREBZF	58487
234997_x_at	1.44609	0.00247822
231683_at	0.751368	0.00249304	GLYAT	10249
238044_at	0.638721	0.00249973
238151_at	0.544909	0.0025026
220091_at	0.617036	0.00253423	SLC2A6	11182
212469_at	0.777526	0.002539	NIPBL	25836
201278_at	0.711126	0.00255841	DAB2	1601
227520_at	0.773507	0.0025682	TXLNG	55787
218032_at	0.788269	0.00257163	SNN	8303
213583_x_at	0.812787	0.00258331	EEF1A1 /// EEF1A1P9	1915 /// 441032
212360_at	0.68179	0.00259975	AMPD2	271
396_f_at	1.52691	0.00260492	EPOR	2057
211921_x_at	0.725357	0.00260959	PTMA	5757
210574_s_at	0.810428	0.00261431	NUDC	10726
201726_at	0.790079	0.00261626	ELAVL1	1994
235777_at	0.755169	0.00261707	ANKRD44	91526
242066_at	1.64894	0.00262296
211995_x_at	0.768011	0.00262408	ACTG1	71
224832_at	0.700985	0.0026242	DUSP16	80824
202910_s_at	0.698875	0.00263915	CD97	976
203740_at	0.671404	0.00265781	MPHOSPH6	10200
207266_x_at	0.762657	0.00266286	RBMS1	5937
204588_s_at	0.695366	0.00266414	SLC7A7	9056
228290_at	1.7127	0.00267496	PLK1S1	55857
208765_s_at	0.774766	0.00268017	HNRNPR	10236
212284_x_at	0.757126	0.00269203	TPT1	7178
208656_s_at	0.73696	0.00269567	CCNI	10983
227908_at	0.721556	0.00269671	TBC1D24	57465
218138_at	0.75514	0.00270634	MKKS	8195
202244_at	0.765187	0.0027216	PSMB4	5692
205595_at	0.66987	0.00272237	DSG3	1830
210050_at	0.721153	0.00272514	TPI1	7167
226320_at	0.723935	0.00273091	THOC4	10189
209140_x_at	0.755406	0.00274986	HLA-B	3106
236026_at	0.74278	0.00276199	GPATCH2	55105
214579_at	0.695642	0.00277466	NIPAL3	57185
213953_at	0.679525	0.00281937	KRT20	54474
224449_at	1.57303	0.00282585	DDI2	84301
210087_s_at	0.699564	0.00283952	MPZL1	9019
244706_at	1.85882	0.00284834	PCMTD1	115294
218123_at	0.786417	0.00285736	C21orf59	56683
202416_at	0.741417	0.00286474	DNAJC7	7266
1552643_at	0.526117	0.00288391	ZNF626	199777
218845_at	0.763963	0.00288873	DUSP22	56940
200003_s_at	0.736387	0.00291123	RPL28	6158
200780_x_at	0.76266	0.00292926	GNAS	2778
203535_at	0.740285	0.0029298	S100A9	6280
1562045_at	1.47625	0.00293785	LOC100287951	100287951
232353_s_at	0.777596	0.00295522	STYXL1	51657
200844_s_at	0.642056	0.00296649	PRDX6	9588
206567_s_at	0.760899	0.00296672	PHF20	51230
201102_s_at	0.812214	0.00297986	PFKL	5211
234021_at	0.626985	0.0029825	EML2	24139
202331_at	0.769695	0.00299433	BCKDHA	593
201735_s_at	0.774793	0.00299805	CLCN3	1182
226692_at	0.820993	0.00299887	SERF2	10169
224168_at	0.817224	0.00300446	TXNDC2	84203
224596_at	0.768504	0.00301051	SLC44A1	23446
235121_at	0.658652	0.00301445	ZNF542	147947
229268_at	0.761884	0.00303738	FAM105B	90268
204526_s_at	0.710326	0.00303884	TBC1D8	11138
209161_at	0.76079	0.00304249	PRPF4	9128
242293_at	0.757905	0.00304879	ING3	54556
211105_s_at	0.753828	0.00306923	NFATC1	4772
213399_x_at	0.79837	0.00308258	RPN2	6185
203496_s_at	0.713563	0.00310054	MED1	5469
226214_at	0.764019	0.00312003	GDE1	51573
215051_x_at	0.701582	0.00313269	AIF1	199
225152_at	0.788262	0.00313309	ZNF622	90441
200042_at	0.817835	0.00313625	C22orf28	51493
212273_x_at	0.761498	0.00315433	GNAS	2778
203478_at	0.789825	0.0031689	NDUFC1	4717
230739_at	0.767667	0.0031855	C18orf19	125228
227131_at	0.707745	0.00318679	MAP3K3	4215
212197_x_at	0.762845	0.00318984	MPRIP	23164
200021_at	0.774804	0.00319353	CFL1	1072
224769_at	0.783298	0.00319411
218938_at	0.725036	0.00319889	FBXL15	79176
227241_at	0.752134	0.00320374	MUC15	143662
212235_at	0.615466	0.00321712	PLXND1	23129
200666_s_at	0.749725	0.00322497	DNAJB1	3337
1555355_a_at	0.670328	0.00323056	ETS1	2113
205441_at	0.76234	0.00323929	OCEL1	79629
231697_s_at	0.642834	0.00324702
209385_s_at	0.752833	0.00324964	PROSC	11212
1562582_at	0.709578	0.0032506	TPTE2P1	646405
231007_at	0.706068	0.00325845
241898_at	0.756016	0.00329225	LIPH	200879
205469_s_at	1.72766	0.00329625	IRF5	3663
210715_s_at	0.779628	0.00330191	SPINT2	10653
224634_at	0.792271	0.00330347	GPATCH4	54865
230886_at	1.31247	0.00332373
1553785_at	0.72755	0.00332783	RASGEF1B	153020
218973_at	0.784672	0.00333274	EFTUD1	79631
208772_at	0.816489	0.00335226	ANKHD1 /// ANKHD1-EIF4EBP3	404734 /// 54882
216520_s_at	0.720838	0.00339741	TPT1	7178
225372_at	0.726399	0.00339773	C10orf54	64115
203425_s_at	0.722973	0.00340499	IGFBP5	3488
231600_at	2.12237	0.00340842	CLEC12B	387837
1557641_at	0.707612	0.00341247
209364_at	0.529503	0.0034166	BAD	572
200845_s_at	0.76502	0.00341915	PRDX6	9588
1555725_a_at	0.706582	0.00345222	RGS5	8490
209605_at	0.70988	0.003462	TST	7263
226801_s_at	0.801887	0.00346878	AIDA	64853
1563187_at	0.690107	0.00347218
233282_at	1.4475	0.00348333
213121_at	1.55932	0.00348359	SNRNP70	6625
224726_at	0.811236	0.00350249	MIB1	57534
201934_at	0.830686	0.00350374	WDR82	80335
205926_at	0.747903	0.00350434	IL27RA	9466
203674_at	0.789298	0.00350791	HELZ	9931
200010_at	0.716145	0.00351052	RPL11	6135
200680_x_at	0.787104	0.00353148	HMGB1	3146
206559_x_at	0.845657	0.00353991	EEF1A1	1915
213039_at	0.78369	0.00354439	ARHGEF18	23370
211937_at	0.709103	0.00354916	EIF4B	1975
49111_at	0.732226	0.00355639
214052_x_at	0.753585	0.00358707	BAT2L2	23215
203987_at	1.63832	0.00359184	FZD6	8323
212967_x_at	0.795422	0.00362486	NAP1L1	4673
219004_s_at	0.820117	0.00362554	C21orf45	54069
201903_at	0.657448	0.00362784	UQCRC1	7384
201155_s_at	0.717681	0.00362897	MFN2	9927
223245_at	0.775044	0.00363627	STRBP	55342
228806_at	0.576414	0.00363932	RORC	6097
202205_at	0.741183	0.00364449	VASP	7408
224827_at	0.797184	0.00364597	UBTD2	92181
229976_at	0.710252	0.00364799	MORN5	254956
208834_x_at	0.80515	0.00368743	RPL23A	6147
1553114_a_at	1.31598	0.00370064	PTK6	5753
211951_at	0.821133	0.00370241	NOLC1	9221
1562442_a_at	1.46027	0.0037041	SSBP1	6742
221476_s_at	0.768146	0.00372423	RPL15	6138
216246_at	0.71832	0.00373193
1554784_at	0.687893	0.00374195	CNTN1	1272
214003_x_at	0.716049	0.00375658	RPS20	6224
209850_s_at	0.710348	0.00376278	CDC42EP2	10435
213508_at	0.762399	0.00376591	C14orf147	171546
221515_s_at	0.770856	0.003766	LCMT1	51451
211285_s_at	0.794387	0.00376898	UBE3A	7337
200840_at	0.806162	0.00378414	KARS	3735
224666_at	0.756972	0.00378575	NSMCE1	197370
209375_at	0.815726	0.00379155	XPC	7508
206390_x_at	0.65871	0.00380262	PF4	5196
222862_s_at	0.544931	0.0038343	AK5	26289
202106_at	0.706682	0.00384491	GOLGA3	2802
237495_at	0.650244	0.00387478	MPP7	143098
204571_x_at	0.752873	0.00389398	PIN4	5303
228487_s_at	0.74538	0.00389453
212836_at	0.817993	0.00389641	POLD3	10714
202656_s_at	0.813491	0.00390403	SERTAD2	9792
217673_x_at	0.809209	0.00390808	GNAS	2778
205221_at	0.634626	0.00391701	HGD	3081
236778_at	1.38538	0.00391988
210098_s_at	0.754689	0.00392415
202047_s_at	0.795192	0.0039351	CBX6	23466
211933_s_at	0.787455	0.00394247	HNRNPA3 /// HNRNPA3P1	10151 /// 220988
217796_s_at	0.723207	0.00395046	NPLOC4	55666
212873_at	0.749311	0.00395319	HMHA1	23526
209302_at	0.748094	0.00395727	POLR2H	5437
200804_at	0.741962	0.00397295	TMBIM6	7009
244240_at	0.7218	0.0039829
212532_s_at	0.763202	0.00398893	LSM12	124801
211784_s_at	0.798978	0.00400644	SRSF1	6426
212581_x_at	0.776878	0.0040108	GAPDH	2597
202170_s_at	0.804134	0.0040171	AASDHPPT	60496
1555640_at	0.802036	0.00401745	DAOA	267012
231912_s_at	0.639506	0.00401998	TECPR1	25851
200086_s_at	0.772718	0.00402027	COX4I1	1327
229563_s_at	0.779697	0.00402089	RPL10A	4736
1557292_a_at	1.36359	0.00402409	MCOLN3	55283
1559928_at	0.766657	0.00402869	PAPPA	5069
226695_at	1.34119	0.00404705	PRRX1	5396
217270_s_at	0.708814	0.00405834	DYRK1B	9149
201553_s_at	0.732039	0.00406059	LAMP1	3916
241315_at	0.80285	0.00406096
221979_at	0.64399	0.00406826	LOC100129250	100129250
226331_at	0.788579	0.00409628	BBX	56987
226843_s_at	0.746466	0.00410058	PAPD5	64282
200981_x_at	0.767268	0.00411106	GNAS	2778
217978_s_at	0.789617	0.00411203	UBE2Q1	55585
215313_x_at	0.76861	0.00412326	HLA-A	3105
223526_at	0.799818	0.00412484	C18orf21	83608
221494_x_at	0.774324	0.00413409	EIF3K	27335
226315_at	0.810959	0.00414464	ZNF830	91603
227141_at	0.790586	0.00414516	TYW3	127253
221999_at	0.766379	0.0041485	VRK3	51231
208825_x_at	0.799118	0.0041616	RPL23A	6147
241300_at	0.762168	0.00416874
232496_at	0.75944	0.00419023
232966_at	0.814531	0.00419338	LPIN3	64900
209440_at	0.796332	0.00420928	PRPS1	5631
220731_s_at	0.778864	0.00422136	NECAP2	55707
212017_at	0.796102	0.00422621	FAM168B	130074
218733_at	0.73845	0.00423079	MSL2	55167
228506_at	1.37886	0.00425649	NSMCE4A	54780
228918_at	0.742046	0.0042746	LOC100288617	100288617
220927_s_at	0.669465	0.00428538	HPSE2	60495
217768_at	0.788771	0.00428906	C14orf166	51637
212765_at	0.73104	0.00428955	CAMSAP1L1	23271
206861_s_at	0.772316	0.00431482	CGGBP1	8545
208640_at	0.793392	0.00433312	RAC1	5879
44120_at	0.799028	0.00435768	ADCK2	90956
224439_x_at	0.764921	0.00436722	RNF7	9616
1568872_at	0.74346	0.00436815
224187_x_at	0.794727	0.00438024	HSPA8	3312
202919_at	0.776491	0.00439356	MOBKL3	25843
235603_at	0.789647	0.0043945	HNRNPU	3192
206705_at	1.48347	0.0044014	TULP1	7287
213427_at	0.75536	0.00441632	RPP40	10799
221649_s_at	0.798627	0.00442832	PPAN	56342
207573_x_at	0.767876	0.00443324	ATP5L	10632
227534_at	0.755887	0.0044333	C9orf21	195827
216251_s_at	0.756717	0.00443855	TTLL12	23170
218949_s_at	0.792098	0.00447059	QRSL1	55278
201459_at	0.729497	0.00451257	RUVBL2	10856
202397_at	0.801591	0.00451625	NUTF2	10204
200772_x_at	0.74272	0.00453002	PTMA	5757
207884_at	0.728702	0.00453401	GUCY2D	3000
217388_s_at	0.670683	0.0045404	KYNU	8942
200941_at	0.771058	0.00455321	HSBP1	3281
208092_s_at	0.77728	0.00455397	FAM49A	81553
218409_s_at	0.740115	0.00457597	DNAJC1	64215
225558_at	0.755203	0.00459445	GIT2	9815
208778_s_at	0.774549	0.0046013	TCP1	6950
203748_x_at	0.78938	0.00461146	RBMS1	5937
1556436_at	0.665906	0.00461753	C8orf50	340414
221328_at	0.837417	0.00462763	CLDN17	26285
200905_x_at	0.796175	0.00462833	HLA-E	3133
207772_s_at	0.648582	0.00463324	PRMT8	56341
227672_at	0.639857	0.00463686	C8orf73	642475
202263_at	0.784245	0.0046401	CYB5R1	51706
207697_x_at	0.677686	0.00464114	LILRB2	10288
236351_at	0.736439	0.00465076	LOC389023	389023
223305_at	0.78131	0.00465665	TMEM216	51259
223119_s_at	0.717637	0.00466143	USP47	55031
240254_at	2.00758	0.00466436
225314_at	0.779282	0.00466573	OCIAD2	132299
224783_at	0.705665	0.00469666	FAM100B	283991
204420_at	0.685929	0.00470476	FOSL1	8061
200013_at	0.721836	0.00471248	RPL24	6152
225443_at	0.832169	0.00471758	DCP1A	55802
227547_at	0.753479	0.00471961
238105_x_at	0.697506	0.00472633	WNT7B	7477
201774_s_at	0.732372	0.00473421	NCAPD2	9918
1552882_a_at	0.764998	0.00473866	FAM123B	139285
235559_at	0.684179	0.00475244	FAM188B	84182
204621_s_at	0.455501	0.00475578	NR4A2	4929
201463_s_at	0.742416	0.00476067	TALDO1	6888
201338_x_at	0.809016	0.00479376	GTF3A	2971
224652_at	0.748825	0.0047972	CCNY	219771
223198_x_at	0.758665	0.00480622	COMMD5	28991
224477_s_at	0.771565	0.00480719	NUDT16L1	84309
209853_s_at	0.778396	0.00481149	PSME3	10197
236809_at	1.41542	0.00481992
213388_at	0.773817	0.00485415	PDE4DIP	9659
218993_at	0.810975	0.00486528	RNMTL1	55178
212826_s_at	0.782171	0.00486962	SLC25A6	293
205928_at	0.79484	0.00487096	ZNF443	10224
234339_s_at	0.740657	0.00487192	GLTSCR2	29997
222430_s_at	0.833056	0.00489004	YTHDF2	51441
224675_at	0.788971	0.00489237	MESDC2	23184
207592_s_at	0.728852	0.00490099	HCN2	610
225394_s_at	0.795126	0.00491923	ZCRB1	85437
217549_at	0.762531	0.00493063
215082_at	0.760121	0.00493653	ELOVL5	60481
223097_at	0.767582	0.00494457	ADPRHL2	54936
215450_at	0.758447	0.00494856	SNRPE	6635
224359_s_at	0.759643	0.0049493	HOOK3	84376
205917_at	0.703664	0.00494946	ZNF264	9422
202332_at	0.677414	0.00495303	CSNK1E	1454
208113_x_at	0.832925	0.00495415	PABPC3	5042
217675_at	0.822502	0.0049564	ZBTB7C	201501
1562836_at	1.77441	0.00497114
212661_x_at	0.766615	0.00498239	PPIA	5478
214097_at	0.654078	0.00501744	RPS21	6227
218517_at	0.800141	0.00502598	PHF17	79960
201871_s_at	0.741924	0.00502865	UBXN1	51035
200871_s_at	0.780359	0.0050359	PSAP	5660
201721_s_at	0.724336	0.00507571	LAPTM5	7805
234590_x_at	0.606842	0.00509006
220948_s_at	0.748521	0.00509034	ATP1A1	476
212010_s_at	0.791749	0.00510435	CDV3	55573
215585_at	0.763099	0.00510934	KIAA0174	9798
225510_at	0.591903	0.00511043	OAF	220323
202851_at	0.556259	0.00511445	AAGAB	79719
201293_x_at	0.763818	0.00511559	PPIA	5478
211930_at	0.840022	0.00512335	HNRNPA3	220988
208021_s_at	0.789037	0.0051365	RFC1	5981
238923_at	0.8267	0.00514628	SPOP	8405
201099_at	0.802588	0.00515773	USP9X	8239
217868_s_at	0.811822	0.00519019	METTL9	51108
229632_s_at	0.770617	0.00520081	INTS10	55174
202322_s_at	0.800571	0.00522234	GGPS1	9453
225038_s_at	0.766389	0.00522926	SURF6	6838
227717_at	0.637738	0.00523099	ARHGEF37	389337
211939_x_at	0.78741	0.00523927	BTF3	689
204756_at	0.72102	0.00524734	MAP2K5	5607
200748_s_at	0.774632	0.00525176	FTH1	2495
202224_at	0.763221	0.00525884	CRK	1398
200877_at	0.776558	0.00528342	CCT4	10575
207002_s_at	1.35779	0.00528564	PLAGL1	5325
225772_s_at	0.736526	0.00530159	C12orf62	84987
218607_s_at	0.792959	0.00531874	SDAD1	55153
226132_s_at	1.46588	0.0053459	MANEAL	149175
218190_s_at	0.749833	0.00534677	UQCR10	29796
227107_at	0.787937	0.00535882
204617_s_at	0.701849	0.0053912	ACD	65057
226243_at	0.762854	0.00540572	C2orf79	391356
212363_x_at	0.7842	0.00541712	ACTG1	71
229324_x_at	1.42199	0.00541741	ISYNA1	51477
236210_at	1.50495	0.00546105
1569444_at	1.43374	0.00546869
200949_x_at	0.701456	0.00547281	RPS20	6224
217749_at	0.765343	0.00547687	COPG	22820
208205_at	0.738394	0.0054773	PCDHA9	9752
209486_at	0.788522	0.00549013	UTP3	57050
200843_s_at	0.801982	0.00550973	EPRS	2058
219406_at	0.777679	0.00552014	C1orf50	79078
201292_at	1.70925	0.00552373	TOP2A	7153
211978_x_at	0.786599	0.00552391	PPIA	5478
239581_at	0.626809	0.00554079	ARL10	285598
227454_at	0.525459	0.00554159	TAOK1	57551
209916_at	0.780526	0.00555394	DHTKD1	55526
201778_s_at	0.809363	0.00555751	KIAA0494	9813
211487_x_at	0.697458	0.00556427	LOC100505503 /// RPS17	100505503 /// 6218
228753_at	0.721873	0.00556627	LOC100128737	100128737
232790_at	0.752194	0.0055869
200035_at	0.747087	0.00560109	CTDNEP1	23399
228097_at	1.27915	0.00561452	MYLIP	29116
220023_at	0.735742	0.00563336	APOB48R	55911
201544_x_at	0.803084	0.00563387	PABPN1	8106
211724_x_at	0.790053	0.00563396	MIOS	54468
41512_at	0.838321	0.00563641	BRAP	8315
218198_at	0.846362	0.00564568	DHX32	55760
201365_at	0.768312	0.00565082	OAZ2	4947
204827_s_at	0.630237	0.00566031	CCNF	899
209545_s_at	0.78439	0.00567215	RIPK2	8767
227345_at	0.753085	0.00567684	TNFRSF10D	8793
228771_at	0.776709	0.00569268	ADRBK2	157
234234_at	0.755458	0.00569551
222405_at	0.802423	0.00570882	PTPLAD1	51495
225029_at	0.819977	0.00571393	LOC550643	550643
74694_s_at	0.723419	0.00571449	RABEP2	79874
227878_s_at	0.74165	0.00572604	ALKBH7	84266
228544_s_at	0.748431	0.00575205	CSRP2BP /// PET117	100303755 /// 57325
222744_s_at	0.770153	0.00575425	TMLHE	55217
223138_s_at	0.777624	0.00575452	DHX36	170506
211765_x_at	0.765999	0.00575634	PPIA	5478
222475_at	0.726293	0.00576204	SAP30BP	29115
206953_s_at	0.772133	0.00576486	LPHN2	23266
203832_at	0.784539	0.00576559	SNRPF	6636
203606_at	0.747182	0.00577076	NDUFS6	4726
228507_at	0.594074	0.00579222
1556769_a_at	0.565795	0.00579357
237295_at	0.727463	0.00579908
211974_x_at	0.765346	0.00584498	RBPJ	3516
200048_s_at	0.818138	0.00586736	JTB	10899
229002_at	0.483339	0.00587418	FAM69B	138311
231594_at	0.688491	0.00587456
225876_at	0.802852	0.00588035	NIPAL3	57185
225693_s_at	0.779444	0.00588562	CAMTA1	23261
204594_s_at	0.825853	0.00589986	SMCR7L	54471
228570_at	0.797923	0.00590952	BTBD11	121551
208499_s_at	0.698041	0.00591578	DNAJC3	5611
202953_at	1.76658	0.00593923	C1QB	713
1561015_at	0.503892	0.00594887
231035_s_at	0.734885	0.00596132
205708_s_at	0.764951	0.00596407	TRPM2	7226
227344_at	0.788195	0.00596442	IKZF1	10320
208178_x_at	0.579249	0.00598962	TRIO	7204
204214_s_at	0.782687	0.00601648	RAB32	10981
204461_x_at	0.852652	0.00603139	RAD1	5810
202852_s_at	0.768889	0.00605152	AAGAB	79719
217827_s_at	0.770312	0.00605788	SPG21	51324
208628_s_at	0.748203	0.00606414	YBX1	4904
212254_s_at	0.760787	0.00607308	DST	667
214084_x_at	0.689699	0.00608016	NCF1C	654817
222792_s_at	0.769585	0.00608677	CCDC59	29080
212674_s_at	0.750634	0.00609461	DHX30	22907
1562686_at	0.777451	0.00609841
202105_at	0.785414	0.00612106	IGBP1	3476
204763_s_at	1.38876	0.00612564	GNAO1	2775
208088_s_at	0.811523	0.0061565	CFHR5	81494
212116_at	0.797222	0.00616812	TRIM27	5987
232088_x_at	1.52711	0.00616865	LOC100271722	100271722
200028_s_at	0.798993	0.00617391	STARD7	56910
213738_s_at	0.795471	0.00618249	ATP5A1	498
201479_at	0.791625	0.00621016	DKC1	1736
226744_at	0.813526	0.00621315	METT10D	79066
225805_at	0.75716	0.00621755	HNRNPU	3192
228987_at	0.779747	0.00622343
212766_s_at	0.775948	0.00623114	ISG20L2	81875
208763_s_at	0.750794	0.00624216	TSC22D3	1831
200016_x_at	0.855765	0.00624565	HNRNPA1	3178
239912_at	1.4964	0.00624785
225441_x_at	0.73769	0.00626091	LSMD1	84316
210250_x_at	0.791465	0.00626431	ADSL	158
237046_x_at	0.781503	0.00627938	IL34	146433
227121_at	0.785993	0.00628157
203126_at	0.757659	0.00629698	IMPA2	3613
218057_x_at	0.810897	0.00630963	COX4NB	10328
201417_at	0.715399	0.0063203	SOX4	6659
225157_at	0.794579	0.00632037	MLXIP	22877
203279_at	0.858729	0.00632875	EDEM1	9695
200085_s_at	0.720935	0.00632921	TCEB2	6923
204265_s_at	0.786684	0.0063325	GPSM3	63940
203184_at	0.716704	0.00633271	FBN2	2201
226396_at	0.606834	0.00633774	C17orf106	100134934
227962_at	0.750298	0.00634637	ACOX1	51
200726_at	0.811243	0.00635963	PPP1CC	5501
224928_at	0.797015	0.00636307	SETD7	80854
215535_s_at	0.684872	0.00637609	AGPAT1	10554
209200_at	0.704536	0.00637988	MEF2C	4208
205968_at	0.716229	0.00638346	KCNS3	3790
231108_at	0.725961	0.00639302	FUS	2521
201587_s_at	0.769385	0.00639895	IRAK1	3654
1555847_a_at	0.710525	0.00642025	LOC284454	284454
224910_at	0.770099	0.00643133	CARHSP1	23589
240468_at	0.751822	0.00646218
221069_s_at	0.826941	0.00647182	TACO1	51204
238587_at	0.814252	0.0064857	UBASH3B	84959
217846_at	0.782726	0.00648814	QARS	5859
218160_at	0.823928	0.00649897	NDUFA8	4702
207224_s_at	0.766959	0.00649961	SIGLEC7	27036
201306_s_at	0.80467	0.00650218	ANP32B	10541
200596_s_at	0.774146	0.0065073	EIF3A	8661
202439_s_at	0.733779	0.00650889	IDS	3423
1557889_at	0.767361	0.00651673
218112_at	0.756695	0.00655235	MRPS34	65993
202723_s_at	0.772589	0.00657288	FOXO1	2308
227369_at	0.801649	0.00657726	SERBP1	26135
201462_at	0.731399	0.00658899	SCRN1	9805
202815_s_at	0.819225	0.00660666	HEXIM1	10614
217065_at	0.779235	0.00665481	TRD@	6964
214394_x_at	0.800722	0.00666242	EEF1D	1936
224920_x_at	0.618168	0.0066823	MYADM	91663
1568717_a_at	0.554964	0.00670708	FKBP15	23307
241813_at	1.33342	0.00672788	MBD1	4152
238580_at	1.62297	0.00676208
229295_at	0.71622	0.00678563	IL17RA	23765
237107_at	1.56681	0.00679018	PRKRA	8575
230992_at	0.734974	0.00679152	BTNL9	153579
1557638_at	0.738454	0.0068023	LOC100287676	100287676
239309_at	0.73416	0.00681829	DLX6	1750
1568870_at	0.729818	0.00681844	SLC24A4	123041
223816_at	0.705176	0.00682843	SLC46A2	57864
217807_s_at	0.784526	0.00684049	GLTSCR2	29997
228697_at	0.734032	0.00685205	HINT3	135114
222396_at	0.789453	0.00686627	HN1	51155
203974_at	0.766953	0.00687769	HDHD1	8226
242505_at	0.709598	0.0068834
242738_s_at	0.720086	0.0068839	ZFHX3	463
226613_at	0.598679	0.00688964	GATSL3 /// TBC1D10A	652968 /// 83874
221021_s_at	0.792708	0.00690144	CTNNBL1	56259
230309_at	0.619452	0.0069246	BHMT2	23743
224912_at	0.795657	0.00693399	TTC7A	57217
225588_s_at	0.753553	0.0069586	TMEM129	92305
1554876_a_at	0.730515	0.0069638	S100Z	170591
1557585_at	1.29405	0.00698442	ATP6V1H	51606
201914_s_at	0.729814	0.00699328	SEC63	11231
244750_at	0.78901	0.0070067
202567_at	0.798141	0.00702215	SNRPD3	6634
228272_at	0.609491	0.00702272	DNLZ	728489
201426_s_at	0.731073	0.00705376	VIM	7431
201290_at	0.772293	0.00706987	SEC11A	23478
229804_x_at	1.41837	0.00707834	CBWD1 /// CBWD2 /// CBWD3 /// CBWD6	150472 /// 445571 /// 55871 /// 644019
209619_at	0.745474	0.0070802	CD74	972
223398_at	0.773944	0.00709031	C9orf89	84270
227999_at	0.749719	0.00711797	PWWP2B	170394
203778_at	0.803797	0.00712262	MANBA	4126
212534_at	0.804824	0.0071507	ZNF24	7572
216887_s_at	0.708313	0.00717579	LDB3	11155
224718_at	0.763786	0.00718896	YY1	7528
211378_x_at	0.785552	0.00719168	PPIA	5478
224511_s_at	0.769141	0.00720091	TXNDC17	84817
205812_s_at	0.77765	0.00722839	TMED9	54732
203082_at	0.815445	0.00724166	BMS1	9790
213794_s_at	0.789083	0.00724596	NGDN	25983
224948_at	0.774132	0.00725301	MRPS24	64951
218799_at	0.80976	0.00725474	GPN2	54707
203152_at	0.764898	0.0072648	MRPL40	64976
202388_at	0.747145	0.00728334	RGS2	5997
202084_s_at	0.779363	0.00729038	SEC14L1	6397
203542_s_at	0.729441	0.00729211	KLF9	687
AFFX-r2-Ec-bioD-3_at	0.661094	0.00729881
201142_at	0.834098	0.00732514	EIF2S1	1965
201922_at	0.722448	0.00732527	NSA2	10412
215761_at	0.718131	0.00732623	DMXL2	23312
209503_s_at	0.809799	0.00732957	PSMC5	5705
200697_at	0.793952	0.00732963	HK1	3098
221847_at	0.793962	0.00734294	LOC100129361	100129361
208814_at	0.714676	0.00736022	HSPA4	3308
219653_at	0.718348	0.00738201	LSM14B	149986
200746_s_at	0.83138	0.00739525	GNB1	2782
225875_s_at	0.811997	0.00739802	NIPAL3	57185
237435_at	0.630702	0.00743608
235024_at	0.82079	0.00744639	PHF17	79960
212886_at	0.765741	0.00751443	CCDC69	26112
201473_at	0.777926	0.00751463	JUNB	3726
201344_at	0.8517	0.00752496	UBE2D2	7322
215993_at	0.710359	0.00752786
1564521_x_at	0.791019	0.0075306	PRMT5	10419
226267_at	0.773119	0.00753746	JDP2	122953
226170_at	0.815811	0.00753837	EYA3	2140
1563709_at	0.709911	0.00754686	LOC100127955 /// LOC100128374	100127955 /// 100128374
212118_at	0.784079	0.00755308	TRIM27	5987
201059_at	0.76475	0.00759012	CTTN	2017
202116_at	0.773033	0.00759567	DPF2	5977
1560746_at	0.720824	0.00760823	C1orf118	374987
244050_at	0.756879	0.00764497	PTPLAD2	401494
239889_at	0.810474	0.00766713	SERP2	387923
225731_at	0.774108	0.00768717	ANKRD50	57182
201723_s_at	0.775742	0.00770157	GALNT1	2589
209709_s_at	1.60148	0.00770705	HMMR	3161
229429_x_at	0.771396	0.00771515	LOC728855	728855
218188_s_at	0.780839	0.00771623	TIMM13	26517
224979_s_at	0.52196	0.00773706	USP36	57602
218496_at	0.82702	0.00776738	RNASEH1	246243
224597_at	0.855346	0.00777392	LOC647979	647979
205963_s_at	0.82213	0.0077768	DNAJA3	9093
230443_at	0.640306	0.00777855	NHP2L1	4809
1562267_s_at	0.72738	0.00779291	ZNF709	163051
200882_s_at	0.78748	0.00782928	PSMD4	5710
207291_at	0.633631	0.00785609	PRRG4	79056
227627_at	0.810336	0.00785917	SGK3	23678
AFFX-r2-P1-cre-5_at	0.687349	0.00786101
208777_s_at	0.833834	0.00786718	PSMD11	5717
230162_s_at	0.711945	0.00787051	MAPK8IP3	23162
224881_at	0.842715	0.00787068	VKORC1L1	154807
223695_s_at	0.77199	0.00787102	ARSD	414
209184_s_at	0.733879	0.007876	IRS2	8660
200833_s_at	0.793025	0.00788765	RAP1B	5908
228307_at	0.725554	0.00790107	EMILIN3	90187
227426_at	0.835687	0.0079295	SOS1	6654
223514_at	0.724417	0.00794342	CARD11	84433
211615_s_at	0.792626	0.00794494	LRPPRC	10128
225269_s_at	0.817911	0.00795889	RBMS1	5937
201569_s_at	0.771953	0.00796366	SAMM50	25813
238189_at	0.775895	0.00797324	SIN3A	25942
204031_s_at	0.762577	0.00797511	PCBP2	5094
219934_s_at	0.815058	0.00797531	SULT1E1	6783
212968_at	0.711719	0.00799687	RFNG	5986
210453_x_at	0.741947	0.00806013	ATP5L	10632
204208_at	0.824059	0.00808251	RNGTT	8732
217946_s_at	0.800124	0.00808765	SAE1	10055
201498_at	0.812103	0.00812438	USP7	7874
219633_at	0.813955	0.00812477	TTPAL	79183
233619_at	0.751167	0.00812985
240370_at	1.50508	0.00814772
216170_at	1.36634	0.00816338
244190_at	1.85534	0.00816986	THAP5	168451
223003_at	0.805191	0.00818406	C19orf43	79002
227765_at	0.743671	0.00820636	LOC100506365	100506365
226945_at	0.813737	0.00822378	RHBDD1	84236
211928_at	0.733172	0.00822557	DYNC1H1	1778
241610_x_at	1.4135	0.00822938
225280_x_at	0.759	0.00827499	ARSD	414
215905_s_at	0.782638	0.00829037	SNRNP40	9410
215706_x_at	0.747565	0.00830599	ZYX	7791
224076_s_at	0.832894	0.00831479	WHSC1L1	54904
221059_s_at	0.753405	0.00832532	COTL1	23406
1558101_at	0.880773	0.00833513	NFIA	4774
218336_at	0.773189	0.00833725	PFDN2	5202
223318_s_at	0.735741	0.00833875	ALKBH7	84266
217341_at	0.662718	0.00834708	DNM1	1759
213080_x_at	0.759655	0.00835279	RPL5	6125
213048_s_at	0.771241	0.00835627
201323_at	0.820718	0.00838258	EBNA1BP2	10969
224704_at	0.798284	0.00838306	TNRC6A	27327
227067_x_at	0.68609	0.00840558	NOTCH2NL	388677
204454_at	0.74683	0.0084174	LDOC1	23641
238124_at	0.762395	0.00843607	MYOM3	127294
202384_s_at	0.748428	0.00844079	TCOF1	6949
224903_at	0.781848	0.0084606	CIRH1A	84916
209190_s_at	0.796304	0.00847552	DIAPH1	1729
228435_at	0.763564	0.00848116	FEM1A	55527
224871_at	0.793486	0.00849054	TPRG1L	127262
217509_x_at	0.747699	0.00850074	GRIK5	2901
AFFX-BioB-M_at	0.646394	0.00850869
221756_at	0.782446	0.00850942	PIK3IP1	113791
202040_s_at	0.745381	0.00850981	KDM5A	5927
1559315_s_at	0.759396	0.00851614	LOC144481	144481
224632_at	0.792735	0.00851667	GPATCH4	54865
237009_at	2.04978	0.00852273
1557953_at	0.773654	0.00854585	ZKSCAN1	7586
219180_s_at	0.821372	0.00854868	PEX26	55670
228301_x_at	0.753375	0.00855564	NDUFB10	4716
204479_at	0.793406	0.00855634	OSTF1	26578
1564212_at	0.72257	0.0085586	LOC100289084	100289084
225266_at	0.804584	0.00856166	ZNF652	22834
AFFX-r2-Ec-bioC-5_at	0.645511	0.00857041
214075_at	0.690855	0.00858397	NENF	29937
1558930_at	1.37089	0.00858991	LOC728192	728192
204719_at	0.692736	0.00859339	ABCA8	10351
202344_at	0.69258	0.00860769	HSF1	3297
221294_at	1.60688	0.00861899	GPR21	2844
211058_x_at	0.797659	0.0086209	TUBA1B	10376
212894_at	0.796628	0.00863573	SUPV3L1	6832
221744_at	0.806519	0.00865075	DCAF7	10238
202548_s_at	0.794387	0.00865314	ARHGEF7	8874
212516_at	0.708168	0.00866337	ARAP1	116985
217764_s_at	0.788768	0.00867792	RAB31	11031
218784_s_at	0.611563	0.00867803	C6orf64	55776
224820_at	0.803513	0.00868039	FAM36A	116228
235735_at	0.739722	0.00868649
236635_at	0.681534	0.00870628	ZNF667	63934
211072_x_at	0.792849	0.00871838	TUBA1B	10376
AFFX-r2-Ec-bioC-3_at	0.665373	0.00872103
220403_s_at	0.801646	0.00873058	TP53AIP1	63970
231078_at	0.754503	0.00878337
224755_at	0.774866	0.00878414	TM9SF3	56889
218194_at	0.773457	0.00880185	REXO2	25996
224394_at	0.78241	0.00884341	RNF7	9616
236071_at	0.717191	0.00885712	LOC494558	494558
212317_at	0.745015	0.00888924	TNPO3	23534
238901_at	1.35101	0.00889094	LOC100505633	100505633
202093_s_at	0.763804	0.00889905	PAF1	54623
211662_s_at	0.814265	0.00890844	VDAC2	7417
209239_at	0.799263	0.00891923	NFKB1	4790
219269_at	0.749183	0.00892133	HMBOX1	79618
1569078_at	0.764583	0.00892317	LOC100294362	100294362
226830_x_at	0.773087	0.00892499	CHD2	1106
201901_s_at	0.791847	0.00892539	YY1	7528
234424_at	0.768348	0.00893906
217760_at	0.816993	0.00894131	TRIM44	54765
201354_s_at	0.771738	0.00897989	BAZ2A	11176
237312_at	0.705107	0.00898399	LOC100508409	100508409
234864_s_at	1.52245	0.00898595	TRPM6	140803
201502_s_at	0.751403	0.00899582	NFKBIA	4792
201665_x_at	0.713946	0.00902037	RPS17	6218
213500_at	0.78699	0.00903502
223008_s_at	0.764305	0.00904135	C9orf5	23731
221780_s_at	0.71758	0.00904452	DDX27	55661
218522_s_at	0.788771	0.00904739	MAP1S	55201
225364_at	0.81644	0.00906874	STK4	6789
242792_at	0.726819	0.00907413
202521_at	0.814044	0.00910913	CTCF	10664
228234_at	0.80604	0.00912038	TICAM2 /// TMED7-TICAM2	100302736 /// 353376
201186_at	0.761428	0.00912117	LRPAP1	4043
222122_s_at	0.820822	0.00913	THOC2	57187
212082_s_at	0.782313	0.00913886	MYL6	4637
235309_at	0.812987	0.00919792	RPS15A	6210
207783_x_at	0.791622	0.00920321	HUWE1	10075
200834_s_at	0.699774	0.00920544	RPS21	6227
201416_at	0.725054	0.00920929	SOX4	6659
1554119_at	1.40443	0.00921732	C16orf57	79650
210616_s_at	0.78949	0.0092476	SEC31A	22872
222010_at	0.819704	0.00926466	TCP1	6950
220688_s_at	0.774133	0.00927019	MRTO4	51154
1559975_at	0.775782	0.00928411	BTG1	694
203528_at	0.734027	0.00928789	SEMA4D	10507
218061_at	0.770243	0.00930032	MEA1	4201
200006_at	0.803787	0.00934447	PARK7	11315
210648_x_at	0.804881	0.00935837	SNX3	8724
213867_x_at	0.748412	0.0093712	ACTB	60
223011_s_at	0.815841	0.00937578	OCIAD1	54940
215008_at	0.84334	0.00937705	TLL2	7093
212085_at	0.807266	0.00941917	SLC25A6	293
201454_s_at	0.741995	0.00946254	NPEPPS	9520
232301_at	0.758301	0.00947507	UBE3B	89910
201505_at	0.737794	0.00947714	LAMB1	3912
226935_s_at	0.823582	0.00949087	CLPTM1L	81037
225348_at	0.7588	0.00950221	SRSF10	10772
217874_at	0.768456	0.00950297	SUCLG1	8802
200771_at	0.685492	0.00951148	LAMC1	3915
200064_at	0.778226	0.00953614	HSP90AB1	3326
AFFX-BioC-5_at	0.652176	0.00954384
200937_s_at	0.774086	0.00954717	RPL5	6125
208746_x_at	0.751852	0.00956401	ATP5L	10632
232247_at	0.603857	0.00957781	ZNF502	91392
226765_at	0.711301	0.00958085	SPTBN1	6711
1562834_at	0.805011	0.00958775
216913_s_at	0.677668	0.00960712	RRP12	23223
AFFX-HUMGAPDH/M33197_3_at	0.813637	0.0096084	GAPDH	2597
214459_x_at	0.786723	0.0096196	HLA-C	3107
224887_at	0.74083	0.0096324	GNPTG	84572
224992_s_at	0.763257	0.00968769	CMIP	80790
204184_s_at	0.761516	0.0096997	ADRBK2	157
216183_at	1.30481	0.00970179	TGM2	7052
201226_at	0.77938	0.00972283	NDUFB8 /// SEC31B	25956 /// 4714
227184_at	0.767515	0.00975406	PTAFR	5724
201648_at	0.793058	0.0097792	JAK1	3716
232082_x_at	0.763004	0.00980136	SPRR3	6707
225352_at	0.825929	0.00981655	SEC62	7095
240805_at	0.792159	0.00981989
240089_at	1.51731	0.00982373
224504_s_at	0.810494	0.00982775	BUD13	84811
224939_at	0.854884	0.00983196	NUFIP2	57532
200860_s_at	0.817619	0.00983211	CNOT1	23019
218384_at	0.785685	0.00984933	CARHSP1	23589
202114_at	0.799459	0.00985323	SNX2	6643
230690_at	0.728756	0.00985511	TUBB1	81027
205470_s_at	0.702269	0.00985791	KLK11	11012
201672_s_at	0.847756	0.00985999	USP14	9097
206316_s_at	1.27273	0.00986116	KNTC1	9735
217988_at	0.795229	0.00986613	CCNB1IP1	57820
1562674_at	1.29711	0.00986978
219053_s_at	0.819587	0.00988633	VPS37C	55048
203214_x_at	1.67795	0.0098903	CDK1	983
1565716_at	0.758147	0.00989296	FUS	2521
213333_at	0.832956	0.00989632	MDH2	4191
225816_at	0.827432	0.00992286	PHF17	79960
209678_s_at	0.72657	0.00992928	PRKCI	5584
217949_s_at	0.767056	0.00993151	VKORC1	79001
208660_at	0.819794	0.00994148	CS	1431
220890_s_at	0.828654	0.00995576	DDX47	51202
233284_at	1.28771	0.00997094
212688_at	0.81926	0.00998236	PIK3CB	5291
218308_at	0.713071	0.00998337	TACC3	10460
1569519_at	0.743946	0.0099877	KIAA1245 /// NBPF1 /// NBPF10 /// NBPF11 /// NBPF12 /// NBPF24 /// NBPF8 /// NBPF9	100132406 /// 149013 /// 200030 /// 400818 /// 440675 /// 55672 /// 728841 /// 728912
1562989_at	0.890555	0.00998797
208688_x_at	0.774652	0.010016	EIF3B	8662
233424_at	0.716012	0.0100319
1555186_at	0.730693	0.0100342	CDKN1A	1026
225473_at	0.703323	0.0100423	C20orf117	140710
223411_at	0.81173	0.010059	MIF4GD	57409
222559_s_at	0.838777	0.0100708	RPRD1A	55197
210461_s_at	0.715255	0.0100753	ABLIM1	3983
204254_s_at	0.794391	0.0100816	VDR	7421
38149_at	0.76115	0.0100849	ARHGAP25	9938
54632_at	0.833629	0.0100871	THADA	63892
223875_s_at	0.698791	0.0100969	EPC1	80314
202225_at	0.818606	0.0100981	CRK	1398
209778_at	0.794217	0.0101293	TRIP11	9321
218606_at	0.775056	0.0101355	ZDHHC7	55625
226153_s_at	0.825559	0.0101386	CNOT6L	246175
218495_at	0.781369	0.0101405	UXT	8409
218019_s_at	0.720245	0.0101541	PDXK	8566
218327_s_at	0.831049	0.0101615	SNAP29	9342
218447_at	0.772886	0.0101663	C16orf61	56942
1567013_at	0.74147	0.0101678	NFE2L2	4780
219045_at	0.819728	0.0101686	RHOF	54509
229409_s_at	1.37374	0.0102038
216159_s_at	1.37817	0.0102332
230368_at	0.643833	0.0102658	ERF	2077
219966_x_at	0.788755	0.0102749	BANP	54971
204882_at	0.772947	0.010282	ARHGAP25	9938
218287_s_at	0.849276	0.0102858	EIF2C1	26523
231830_x_at	0.785188	0.0102861	RAB11FIP1	80223
204061_at	0.803308	0.0103048	PRKX	5613
212626_x_at	0.854291	0.0103059	HNRNPC	3183
243817_at	1.38501	0.0103261
237987_x_at	0.785302	0.0103264
1565862_a_at	0.932633	0.0103267
201863_at	0.785841	0.0103401	FAM32A	26017
227143_s_at	0.801564	0.0103445	BID	637
202406_s_at	0.798937	0.0103755	TIAL1	7073
201499_s_at	0.855342	0.0103874	USP7	7874
201220_x_at	0.786624	0.010404	CTBP2	1488
212396_s_at	0.586212	0.0104118	KIAA0090	23065
202181_at	0.753806	0.0104119	KIAA0247	9766
224680_at	0.841497	0.0104333	TMED4	222068
208998_at	0.733971	0.0104392	UCP2	7351
238596_at	1.42533	0.0104624	FRA10AC1	118924
AFFX-BioC-3_at	0.654753	0.0104808
213620_s_at	0.745659	0.0104976	ICAM2	3384
221708_s_at	0.763135	0.0104977	UNC45A	55898
223173_at	0.711992	0.0105015	SPNS1	83985
240557_at	0.798899	0.0105388
225169_at	0.789179	0.0105417	INTS4	92105
202802_at	0.806949	0.0105425	DHPS	1725
1560563_at	0.936942	0.0105476
225452_at	0.768086	0.0105495	MED1	5469
222112_at	1.45091	0.010583	EPS15L1	58513
210482_x_at	0.643629	0.0105833	MAP2K5	5607
204513_s_at	0.799394	0.0105944	ELMO1	9844
210501_x_at	0.78373	0.0105964	EIF3K	27335
229263_at	0.726793	0.0106066	IL17RD	54756
236301_at	0.749218	0.01061	IKZF3	22806
219849_at	0.784286	0.0106175	ZNF671	79891
219176_at	0.836142	0.0106187	C2orf47	79568
216384_x_at	0.805939	0.01062	LOC441454 /// LOC728026 /// PTMA /// PTMAP5	150928 /// 441454 /// 5757 /// 728026
202431_s_at	0.776128	0.0106202	MYC	4609
200614_at	0.797926	0.0106544	CLTC	1213
200975_at	0.736506	0.0106645	PPT1	5538
209301_at	0.652583	0.0106727	CA2	760
200089_s_at	0.799532	0.0106959	RPL4	6124
231985_at	1.46736	0.0107273	MICAL3	57553
213687_s_at	0.72086	0.0107536	RPL35A	6165
200801_x_at	0.740443	0.0107651	ACTB	60
209876_at	0.695695	0.0107785	GIT2	9815
203247_s_at	0.862081	0.0107904	ZNF24	7572
226841_at	0.749756	0.0108014	MPEG1	219972
206492_at	0.708428	0.0108015	FHIT	2272
215111_s_at	0.749038	0.0108125	TSC22D1	8848
214037_s_at	0.730084	0.0108126	CCDC22	28952
215980_s_at	1.53141	0.0108176	IGHMBP2	3508
225082_at	0.823104	0.0108441	CPSF3	51692
217835_x_at	0.799512	0.0108549	C20orf24	55969
219025_at	0.646638	0.0108581	CD248	57124
203341_at	0.794116	0.0108584	CEBPZ	10153
221277_s_at	0.812696	0.0108656	PUS3	83480
243672_at	0.732062	0.0108733	SALL3	27164
208034_s_at	1.33459	0.0108812	PROZ	8858
214957_at	0.764266	0.0108867	ACTL8	81569
1556888_at	0.781986	0.0108878
226336_at	0.82683	0.0109106	PPIA	5478
223287_s_at	0.74899	0.0109162	FOXP1	27086
200098_s_at	0.852999	0.0109233	ANAPC5	51433
238842_at	0.825947	0.0109354
214626_s_at	0.763467	0.0109635	GANAB	23193
217727_x_at	0.797384	0.0109657	VPS35	55737
200869_at	0.793955	0.0109868	RPL18A /// RPL18AP3	390354 /// 6142
210347_s_at	0.744082	0.0109869	BCL11A	53335
223363_at	0.76518	0.0110127	PSMG3	84262
201100_s_at	0.829705	0.0110208	USP9X	8239
218320_s_at	0.784595	0.0110329	NDUFB11	54539
64432_at	0.820529	0.0110398	C12orf47	51275
1560928_at	1.37383	0.0110492	LOC151657	151657
219212_at	0.802556	0.0110551	HSPA14	51182
225509_at	0.802882	0.0110589	SAP30L	79685
211750_x_at	0.789481	0.0110622	TUBA1C	84790
237409_at	0.657049	0.0110717
220598_at	0.891233	0.0111345	CARD14	79092
229347_at	1.50261	0.011168
1570169_at	0.674893	0.0111763	CSMD2	114784
213453_x_at	0.788555	0.0111953	GAPDH	2597
202246_s_at	0.796603	0.0111976	CDK4	1019
204455_at	0.747932	0.0112053	DST	667
203088_at	0.721956	0.0112076	FBLN5	10516
202702_at	0.785909	0.0112242	TRIM26	7726
214211_at	0.790329	0.0112396	FTH1	2495
1552309_a_at	0.678335	0.0112397	NEXN	91624
AFFX-r2-Ec-bioD-5_at	0.663028	0.0112519
200074_s_at	0.79514	0.0112596	RPL14	9045
204396_s_at	0.811754	0.0112981	GRK5	2869
230407_at	0.768379	0.0113031	SBNO1	55206
228763_at	0.800338	0.011309	MDP1	145553
213137_s_at	0.812715	0.0113187	PTPN2	5771
206930_at	1.41301	0.0113231	GLYAT	10249
202395_at	0.784568	0.0113303	NSF	4905
226240_at	0.818982	0.0113679	TADA2B	93624
243135_x_at	1.44937	0.01137	LOC100287081	100287081
204050_s_at	0.770884	0.0113859	CLTA	1211
222152_at	1.36633	0.011386	PDCD6	10016
222494_at	0.822048	0.0113867	FOXN3	1112
217830_s_at	0.766262	0.0114023	NSFL1C	55968
210144_at	0.694013	0.0114047	TBC1D22A	25771
200631_s_at	0.792457	0.0114065	SET	6418
219100_at	0.784523	0.0114082	OBFC1	79991
1563867_at	0.604051	0.0114117	LOC283194	283194
209752_at	0.762754	0.0114262	REG1A	5967
213400_s_at	0.736355	0.0114828	TBL1X	6907
1569891_at	0.709932	0.0115351	ATP5A1	498
212692_s_at	0.857768	0.0115478	LRBA	987
241470_x_at	0.731168	0.0115677
236548_at	0.759685	0.0115698	GIPC2	54810
219097_x_at	0.841463	0.0115723	C19orf42	79086
214548_x_at	0.781489	0.0115902	GNAS	2778
226195_at	0.779335	0.0116089	C14orf179	112752
216438_s_at	0.851823	0.0116154	TMSB4X /// TMSL3	7114 /// 7117
227402_s_at	0.735206	0.0116197	UTP23	84294
AFFX-r2-Ec-bioB-5_at	0.647224	0.0116227
214288_s_at	0.788679	0.0116457	PSMB1	5689
210649_s_at	0.794871	0.0116522	ARID1A	8289
201190_s_at	0.804348	0.0116656	PITPNA	5306
202000_at	0.78729	0.0116739	NDUFA6	4700
201330_at	0.775641	0.0116792	RARS	5917
226896_at	0.796685	0.0116826	CHCHD1	118487
223703_at	0.763446	0.0116852	C10orf11	83938
224578_at	0.792283	0.0116961	RCC2	55920
206651_s_at	0.767055	0.0116962	CPB2	1361
200920_s_at	0.742864	0.0117527	BTG1	694
220355_s_at	0.854889	0.0117528	PBRM1	55193
210588_x_at	0.833311	0.0117921	HNRNPH3	3189
217995_at	0.776575	0.0117933	SQRDL	58472
210440_s_at	1.40478	0.0118236	CDC14A	8556
213405_at	0.830239	0.011825	RAB22A	57403
212885_at	0.820411	0.0118754	MPHOSPH10	10199
202214_s_at	0.829792	0.0118868	CUL4B	8450
219104_at	0.725405	0.0118999	RNF141	50862
213101_s_at	0.846797	0.0119031	ACTR3	10096
225851_at	0.66706	0.0119035	FNTB	2342
217500_at	0.750389	0.0119103	TIAL1	7073
217877_s_at	0.817564	0.0119734	GPBP1L1	60313
219457_s_at	0.700563	0.0119846	RIN3	79890
200005_at	0.794825	0.0119871	EIF3D	8664
223852_s_at	0.755154	0.0120011	STK40	83931
222735_at	0.802583	0.0120193	TMEM38B	55151
200922_at	0.698324	0.0120225	KDELR1	10945
207721_x_at	0.749252	0.0120511	HINT1	3094
210950_s_at	0.776956	0.0120525	FDFT1	2222
121_at	1.28934	0.0120798	PAX8	7849
229321_s_at	0.844445	0.0120832
227580_s_at	0.759229	0.0120952	TECPR1	25851
222221_x_at	0.748128	0.0121243	EHD1	10938
221002_s_at	0.762426	0.0121368	TSPAN14	81619
211582_x_at	0.765452	0.0121391	LST1	7940
222968_at	0.624413	0.0121408	C6orf48	50854
236330_at	0.775006	0.0121412
236510_at	1.32	0.0121468
224879_at	0.777267	0.0122056	C9orf123	90871
237416_at	0.763401	0.0122123
201506_at	0.721885	0.0122155	TGFBI	7045
202750_s_at	0.769249	0.0122653	TFIP11	24144
225735_at	0.825797	0.0122758	ANKRD50	57182
218729_at	0.782763	0.012278	LXN	56925
214042_s_at	0.790187	0.0123236	RPL22	6146
200741_s_at	0.706872	0.0123553	RPS27	6232
204018_x_at	0.661447	0.012424	HBA1 /// HBA2	3039 /// 3040
217853_at	0.775349	0.0124262	TNS3	64759
209162_s_at	0.775813	0.0124317	PRPF4	9128
225384_at	0.777654	0.0124471	DOCK7	85440
223663_at	0.60876	0.0124701	CCDC88B	283234
1553316_at	1.63796	0.0124913	GPR82	27197
201788_at	0.740719	0.0125023	DDX42	11325
210434_x_at	0.854945	0.0125137	JTB	10899
201959_s_at	0.795087	0.0125409	MYCBP2	23077
200951_s_at	0.619095	0.0125453	CCND2	894
1565752_at	0.727572	0.012564	FGD2	221472
32836_at	0.67145	0.012594	AGPAT1	10554
204366_s_at	0.841621	0.0126164	GTF3C2	2976
223066_at	0.817379	0.0126203	SNAPIN	23557
201114_x_at	0.804026	0.0126662	PSMA7	5688
224837_at	0.826725	0.0126843	FOXP1	27086
207585_s_at	0.801738	0.0127116	RPL36AL	6166
208826_x_at	0.754085	0.0127255	HINT1	3094
218312_s_at	0.764278	0.0127261	ZSCAN18	65982
224594_x_at	0.753209	0.0127378	ACTB	60
1559255_a_at	0.848284	0.0127435
214799_at	0.763717	0.0127536	NFASC	23114
1555895_at	0.638874	0.0127767	DNM2	1785
209165_at	0.82928	0.0127851	AATF	26574
217783_s_at	0.811192	0.0127858	YPEL5	51646
212463_at	0.787842	0.01279	CD59	966
238665_at	0.668277	0.012792	ZNF865	100133142
217775_s_at	0.852934	0.0128282	RDH11	51109
230413_s_at	0.665885	0.0128455	AP1S2	8905
224333_s_at	0.79637	0.0128479	MRPS5	64969
219435_at	0.790554	0.0128498	C17orf68	80169
244415_at	0.751306	0.0128694
231843_at	0.830709	0.0128728	DDX55	57696
1555952_at	0.654967	0.0128798	SLC19A1	6573
211948_x_at	0.774641	0.0128828	BAT2L2	23215
210686_x_at	0.876096	0.0128933	SLC25A16	8034
226242_at	0.812268	0.012894	C1orf131	128061
224601_at	0.799991	0.0128984
229951_x_at	1.29192	0.0129117
225053_at	0.849065	0.0129225	CNOT7	29883
233746_x_at	0.809479	0.0129368	C15orf63 /// SERF2	10169 /// 25764
225005_at	0.844784	0.0129388	PHF13	148479
1568619_s_at	0.802861	0.0129805	ITPRIPL2	162073
229543_at	0.754355	0.012989
200012_x_at	0.714471	0.0130058	RPL21	6144
1568830_at	0.756174	0.0130305	IRAK3	11213
213812_s_at	0.730894	0.0130507	CAMKK2	10645
222483_at	0.804554	0.0130512	EFHD2	79180
221861_at	0.749608	0.0130786
226008_at	0.838677	0.0131096	NDNL2	56160
207262_at	0.791483	0.0131458	APOF	319
229256_at	0.78571	0.0131473	PGM2L1	283209
223314_at	0.659712	0.0131482	TSPAN14	81619
244323_at	0.798936	0.0131595	BHLHE22	27319
225933_at	0.760521	0.0131618	CCDC137	339230
204080_at	0.725204	0.0131662	TOE1	114034
233391_at	1.35091	0.013168	CDH26	60437
223671_x_at	0.774414	0.0131714	DPH5	51611
228764_s_at	0.776096	0.01318	MDP1	145553
212313_at	0.805992	0.0132096	CHMP7	91782
203823_at	0.750343	0.0132548	RGS3	5998
229844_at	0.801107	0.0132769	FOXP1	27086
1557252_at	0.763756	0.0133132
1559252_a_at	1.33979	0.0133185	C20orf29	55317
210766_s_at	0.78378	0.013319	CSE1L	1434
207186_s_at	0.805928	0.0133208	BPTF	2186
204341_at	0.705045	0.0133629	TRIM16	10626
201844_s_at	0.759595	0.0133747	RYBP	23429
202670_at	0.808049	0.0133883	MAP2K1	5604
207121_s_at	0.818568	0.0134128	MAPK6	5597
204180_s_at	0.807104	0.013418	ZBTB43	23099
201584_s_at	0.80243	0.0134683	DDX39	10212
204048_s_at	0.804481	0.013479	PHACTR2	9749
220992_s_at	0.816533	0.0135052	C1orf25	81627
222029_x_at	0.756435	0.0135402	PFDN6	10471
202077_at	0.792305	0.0135485	NDUFAB1	4706
219175_s_at	0.852263	0.0135503	SLC41A3	54946
203186_s_at	0.775123	0.0135548	S100A4	6275
229586_at	0.793427	0.0135677	CHD9	80205
218648_at	0.756537	0.0135768	CRTC3	64784
225547_at	0.803208	0.0136355	SNHG6	641638
236421_at	0.800027	0.0136426	ANKRD45	339416
241591_at	0.736668	0.0136504
224617_at	0.813113	0.0136508	ROD1	9991
206978_at	0.744061	0.0136632	CCR2	729230
AFFX-r2-P1-cre-3_at	0.726807	0.0136903
206829_x_at	0.811264	0.0136997	ZNF430	80264
214181_x_at	0.777614	0.0137207	LST1	7940
222367_at	0.718405	0.0137242	WHAMM /// WHAMML1 /// WHAMML2	123720 /// 339005 /// 440253
216859_x_at	1.23411	0.0137357
244360_at	1.25681	0.0137415	FBXL17	64839
207705_s_at	1.30532	0.0137453	NINL	22981
201164_s_at	0.765489	0.0137519	PUM1	9698
217920_at	0.751585	0.0137879	MAN1A2	10905
234615_at	0.777257	0.0137928
201629_s_at	0.712878	0.0137975	ACP1	52
229100_s_at	0.769172	0.0138006	TIMM22	29928
212413_at	0.818963	0.013827	2006-09-01	23157
219595_at	0.769634	0.0138367	LOC100287515 /// ZNF26	100287515 /// 7574
205726_at	0.784994	0.0138456	DIAPH2	1730
219625_s_at	0.773333	0.0138473	COL4A3BP	10087
232443_at	0.703122	0.0139043	LOC441052	441052
244026_at	1.51844	0.0139186
223344_s_at	0.679012	0.0139355	MS4A7	58475
223714_at	0.814963	0.0139704	ZNF256	10172
200760_s_at	0.786502	0.0139738	ARL6IP5	10550
205882_x_at	0.851846	0.0139764	ADD3	120
1557644_at	1.43301	0.0139958
212040_at	0.795801	0.0140008	TGOLN2	10618
222394_at	0.854993	0.0140148	PDCD6IP	10015
226424_at	0.771564	0.0140281	CAPS	828
208968_s_at	0.829818	0.0140482	CIAPIN1	57019
1553743_at	0.772411	0.0140484	FAM119A	151194
201751_at	0.803635	0.0140616	JOSD1	9929
238011_at	0.750258	0.0140748
228993_s_at	0.84176	0.0140757	NCRNA00081	92482
232032_x_at	0.813533	0.0141395	SDF4	51150
201900_s_at	0.761038	0.0141413	AKR1A1	10327
216924_s_at	0.733689	0.0141491	DRD2	1813
1562687_x_at	0.763377	0.0141592
203014_x_at	0.786423	0.0141807	SGSM3	27352
223937_at	0.572287	0.0141826	FOXP1	27086
210740_s_at	0.777299	0.0141888	ITPK1	3705
1556000_s_at	0.811147	0.0141959	BTBD7	55727
207005_s_at	0.658455	0.0142012	BCL2	596
239132_at	0.915371	0.014256	NOS1	4842
220597_s_at	0.808879	0.0142746	ARL6IP4	51329
224599_at	0.805912	0.0142866	CGGBP1	8545
208819_at	0.767521	0.0143183	RAB8A	4218
202188_at	0.736227	0.0143262	NUP93	9688
204559_s_at	0.726334	0.0143308	LSM7	51690
206699_x_at	0.788481	0.0143311	NPAS1	4861
227328_at	0.793744	0.0143515	LOC100505935	100505935
215270_at	1.55576	0.0143636	LFNG	3955
238029_s_at	1.60484	0.0143671	SLC16A14	151473
229788_s_at	0.756897	0.0143996
237201_at	1.44178	0.0144048
215091_s_at	0.827071	0.0144192	GTF3A	2971
206278_at	0.795662	0.014422	PTAFR	5724
209075_s_at	0.868436	0.0144806	ISCU	23479
200623_s_at	0.770348	0.0144987	CALM3	808
201072_s_at	0.676611	0.0145366	SMARCC1	6599
219371_s_at	0.772147	0.014543	KLF2	10365
201346_at	0.80364	0.014565	ADIPOR2	79602
239727_at	0.852234	0.0145716	DIO3-OS	64150
207299_s_at	0.846791	0.014587	GRM1	2911
222514_at	0.783723	0.0146018	RRAGC	64121
1553074_at	0.833394	0.0146224	ASB11	140456
211656_x_at	0.610172	0.0146359	HLA-DQB1 /// LOC100133583	100133583 /// 3119
241072_s_at	0.759244	0.0146422
228498_at	0.751213	0.0146521	B4GALT1	2683
210682_at	0.768561	0.0146539	LPO	4025
219766_at	0.776705	0.014655	B9D2	80776
241640_at	0.741829	0.0146795	BCAP29	55973
212198_s_at	0.759527	0.014684	TM9SF4	9777
217570_x_at	0.718877	0.0147071
234542_at	0.76363	0.0147156	ARHGEF12	23365
225492_at	0.822912	0.0147189	TMEM33	55161
202420_s_at	0.855762	0.014731	DHX9	1660
200703_at	0.818798	0.0147359	DYNLL1	8655
201281_at	0.802592	0.0147373	ADRM1	11047
203916_at	0.757516	0.0147545	NDST2	8509
1558905_at	0.708422	0.0147672
221731_x_at	0.740746	0.0147785	VCAN	1462
225695_at	0.75761	0.0147846	C2orf18	54978
202294_at	0.824387	0.014794	STAG1	10274
38710_at	0.790512	0.0148071	OTUB1	55611
238245_at	0.748944	0.0148195	ENPP7	339221
234895_at	0.880148	0.0148326	CTLA4	1493
201960_s_at	0.797091	0.0148361	MYCBP2	23077
222788_s_at	0.801144	0.0148426	RSBN1	54665
223788_at	0.691987	0.0148451
209901_x_at	0.701035	0.0148523	AIF1	199
216481_at	0.770492	0.0148586	GRIP2	80852
208710_s_at	0.724783	0.0148636	AP3D1	8943
200901_s_at	0.777963	0.0148673	M6PR	4074
202435_s_at	0.701678	0.0149039	CYP1B1	1545
225729_at	0.826398	0.0149047	C6orf89	221477
200808_s_at	0.784841	0.0149212	ZYX	7791
200079_s_at	0.865949	0.0149327	KARS	3735
213668_s_at	0.626587	0.0149395	SOX4	6659
229296_at	0.533254	0.0149441	LOC100506119 /// LOC100508342	100506119 /// 100508342
1553356_at	0.793603	0.0149587
1560797_s_at	1.49131	0.0149671
1560754_at	0.797336	0.0149922	CMTM7	112616
222212_s_at	0.789619	0.015024	LASS2	29956
217939_s_at	0.854762	0.0150361	AFTPH	54812
225631_at	0.831726	0.0150455	EEPD1	80820
224909_s_at	0.733432	0.0150546	PREX1	57580
202857_at	0.79201	0.0150576	CNPY2	10330
242761_s_at	0.78744	0.0150686	ZNF420	147923
201046_s_at	0.706738	0.015079	RAD23A	5886
1560081_at	1.27216	0.0150875
225407_at	0.807345	0.0151024	MBP	4155
1554761_a_at	1.52821	0.0151058	HEATR2	54919
1565130_at	0.738413	0.0151092	MAP3K2	10746
1563340_at	0.733905	0.0151125
1568938_at	0.741677	0.0151249
211833_s_at	0.74322	0.0151901	BAX	581
208705_s_at	0.810938	0.015202	EIF5	1983
223022_s_at	0.857191	0.0152045	VTA1	51534
218684_at	0.833643	0.0152138	LRRC8D	55144
231642_at	0.830127	0.0152243	C6orf201	404220
208890_s_at	0.705798	0.0152275	PLXNB2	23654
226368_at	0.760196	0.015276	CHST11	50515
225862_at	0.745073	0.0152995	SLC25A26	115286
206534_at	0.752104	0.0153056	GRIN2A	2903
204432_at	0.823593	0.0153293	SOX12	6666
231406_at	0.750542	0.0153315	ORAI2	80228
1557244_a_at	1.34532	0.015336
224977_at	0.789703	0.0153538	C6orf89	221477
200792_at	0.798051	0.0153775	XRCC6	2547
241576_at	0.816521	0.015383
218459_at	0.792316	0.0153965	TOR3A	64222
233544_at	0.75118	0.0154011	GNL1	2794
201064_s_at	0.815883	0.0154194	PABPC4	8761
224603_at	0.755322	0.0154746
225927_at	0.837048	0.015479	MAP3K1	4214
238462_at	0.837439	0.0154849	UBASH3B	84959
222287_at	0.833165	0.0154995	TRDN	10345
229387_at	0.751993	0.0154997	LRCH3	84859
1555291_at	0.744665	0.0155129	TRPV3	162514
205859_at	0.713943	0.0155163	LY86	9450
219575_s_at	0.872356	0.0155433	COG8 /// PDF	64146 /// 84342
211699_x_at	0.673986	0.0155495	HBA1 /// HBA2	3039 /// 3040
242963_at	0.700793	0.0155611	SGMS2	166929
222469_s_at	0.800014	0.0155858	TOLLIP	54472
214095_at	0.700485	0.0155881	SHMT2	6472
1553263_at	0.731798	0.0156172	USH1G	124590
218205_s_at	0.785142	0.0156282	MKNK2	2872
201637_s_at	0.772662	0.0156297	FXR1	8087
244738_at	0.776545	0.0156384	BRWD3	254065
221081_s_at	0.792604	0.015657	DENND2D	79961
201094_at	0.730772	0.0156573	RPS29	6235
221732_at	0.730696	0.0156663	CANT1	124583
207517_at	0.736958	0.0156702	LAMC2	3918
213658_at	1.26119	0.0156767
223032_x_at	0.792822	0.0156789	PRELID1	27166
202295_s_at	0.749757	0.0156932	CTSH	1512
222409_at	0.81991	0.015707	CORO1C	23603
212170_at	0.829887	0.0157093	RBM12	10137
204546_at	0.757919	0.0157171	KIAA0513	9764
203905_at	0.803257	0.015745	PARN	5073
200045_at	0.788719	0.0157521	ABCF1	23
218565_at	0.734869	0.0157769	C9orf114	51490
226480_at	0.844375	0.0157812
243528_at	1.59474	0.0157957
202836_s_at	0.801822	0.0158208	TXNL4A	10907
225289_at	0.813103	0.0158238	STAT3	6774
236852_at	0.777001	0.0158273	FBXO43	286151
237055_at	0.725296	0.0158507	LOC100506174	100506174
235085_at	0.813461	0.0158691	SGK223	157285
211623_s_at	0.782365	0.0158906	FBL	2091
218781_at	0.791368	0.0159199	SMC6	79677
217730_at	0.800472	0.0159424	TMBIM1	64114
221513_s_at	0.818279	0.0159558	UTP14A /// UTP14C	10813 /// 9724
232126_at	0.657011	0.015965	COQ2	27235
1564333_a_at	0.755276	0.0159674	PSAPL1	768239
50221_at	0.790429	0.0159682	TFEB	7942
214821_at	0.747646	0.015974	SLC25A4	291
212264_s_at	0.815632	0.0159766	WAPAL	23063
35626_at	0.788334	0.0159776	SGSH	6448
225739_at	0.772575	0.0159871	RAB11FIP4	84440
234526_at	1.37931	0.0160206	OR51B6	390058
217980_s_at	0.810025	0.0160351	MRPL16	54948
204257_at	1.32449	0.0160453	FADS3	3995
224060_s_at	0.795688	0.0160607	DPH5	51611
224932_at	0.606235	0.0160721	CHCHD10	400916
209065_at	0.732082	0.0160811	UQCRB	7381
210495_x_at	0.537799	0.0161034	FN1	2335
227322_s_at	0.795735	0.0161065	BCCIP	56647
224454_at	1.3368	0.016145	ETNK1	55500
AFFX-BioDn-3_at	0.66824	0.016151
231710_at	0.715792	0.0161611	CAPS	828
225562_at	0.816436	0.0161701	RASA3	22821
1552790_a_at	0.82866	0.0161709	SEC62	7095
208132_x_at	0.80409	0.0162045	BAT2	7916
200881_s_at	0.745495	0.0162116	DNAJA1	3301
219402_s_at	0.856883	0.0162156	DERL1	79139
236337_at	1.85971	0.0162164	SYCP2L	221711
224777_s_at	0.835231	0.0162179	PAFAH1B2	5049
44146_at	0.830378	0.0162614	GMEB2	26205
216439_at	0.693223	0.0162625	TNK2	10188
238208_at	0.750444	0.016281
214130_s_at	0.760955	0.016286	PDE4DIP	9659
210835_s_at	0.760201	0.0162888	CTBP2	1488
201748_s_at	0.820979	0.0163043	SAFB	6294
217406_at	0.752201	0.0163076
200761_s_at	0.837947	0.0163122	ARL6IP5	10550
210149_s_at	0.792903	0.0163199	ATP5H	10476
222720_x_at	0.768469	0.0163452	C1orf27	54953
201500_s_at	0.788344	0.0163513	PPP1R11	6992
202025_x_at	0.826525	0.0163585	ACAA1	30
212111_at	0.840885	0.0163627	STX12	23673
219826_at	0.774589	0.0163706	ZNF419	79744
213705_at	0.806244	0.0164008	LOC100509558 /// LOC100510047	100509558 /// 100510047
224983_at	0.78223	0.0164123	SCARB2	950
214259_s_at	0.830367	0.0164134	AKR7A2	8574
237095_at	0.775966	0.0164261	ASXL2	55252
219305_x_at	0.761002	0.0164273	FBXO2	26232
219889_at	0.744836	0.016449	FRAT1	10023
207826_s_at	0.739337	0.0164648	ID3	3399
201336_at	0.791913	0.0164688	VAMP3	9341
1554185_at	1.35531	0.0164711	LOC554206	554206
200661_at	0.740585	0.0164919	CTSA	5476
202009_at	0.816783	0.0165082	TWF2	11344
210074_at	1.51971	0.0165127	CTSL2	1515
1563009_at	0.748732	0.0165247	LOC284930	284930
233547_x_at	0.878268	0.0165291	PDE1A	5136
231509_at	0.730519	0.0165343	C7orf16	10842
229659_s_at	1.35606	0.016552
203098_at	0.828901	0.0166177	CDYL	9425
219473_at	0.831883	0.0166235	GDAP2	54834
213979_s_at	0.828587	0.0166271
1556531_at	0.753014	0.0166306
212437_at	0.784993	0.0166321	CENPB	1059
221370_at	0.74085	0.0166384	LOC100287163 /// ZNF717 /// ZNF73	100131827 /// 100287163 /// 7624
1558397_at	0.713743	0.0166518
218493_at	0.767896	0.0166608	SNRNP25	79622
220809_at	0.664613	0.0166614
225014_at	0.726944	0.0166615	C4orf52	389203
201054_at	0.843892	0.0166795	HNRNPA0	10949
212119_at	0.811228	0.0166999	RHOQ	23433
209782_s_at	0.791967	0.0167029	DBP	1628
218018_at	0.787045	0.016708	PDXK	8566
1562693_at	0.891041	0.0167378
203879_at	0.757192	0.0167465	PIK3CD	5293
211998_at	0.79226	0.0167503	H3F3B	3021
1557174_a_at	0.811256	0.0167526
217610_at	1.83609	0.0168041
230842_at	0.748307	0.0168183	FGFR2	2263
214765_s_at	0.715058	0.0168242	NAAA	27163
218310_at	0.844578	0.0168462	KCTD7 /// RABGEF1	154881 /// 27342
239824_s_at	0.835923	0.0168544	TMEM107	84314
213798_s_at	0.820408	0.0168634	CAP1	10487
200009_at	0.787766	0.0168957	GDI2	2665
226926_at	0.737268	0.0169013	DMKN	93099
212477_at	0.706812	0.0169071	ACAP2	23527
216221_s_at	0.827274	0.0169339	PUM2	23369
201251_at	0.73513	0.0169344	PKM2	5315
209127_s_at	0.764909	0.0169385	SART3	9733
236333_at	0.81203	0.0169397
212447_at	0.806556	0.0169643	KBTBD2	25948
214487_s_at	1.33487	0.0169653	RAP2A /// RAP2B	5911 /// 5912
211227_s_at	0.739314	0.0169778	PCDH11Y	83259
240065_at	0.459268	0.0170059	FAM81B	153643
220296_at	1.49717	0.0170077	FLJ38109	386627
AFFX-r2-Ec-bioB-M_at	0.689091	0.0170438
217720_at	0.769817	0.0170476	CHCHD2	51142
202139_at	0.738789	0.017051	AKR7A2	8574
226733_at	1.23568	0.0170747	PFKFB2	5208
228070_at	0.796717	0.0170953	PPP2R5E	5529
202939_at	0.816509	0.0171182	ZMPSTE24	10269
223665_at	0.715319	0.0171382	ARPM1	84517
214875_x_at	0.789881	0.0171401	APLP2	334
209224_s_at	0.787409	0.017152	NDUFA2	4695
214274_s_at	0.817933	0.0171535	ACAA1	30
241525_at	0.335973	0.0171535	LOC200772	200772
213311_s_at	0.773707	0.0171663	TCF25	22980
210895_s_at	0.710261	0.017177	CD86	942
212484_at	0.779075	0.0171837	FAM89B	23625
212242_at	0.783435	0.0171875	TUBA4A	7277
232693_s_at	0.67976	0.0172142	FBXO16 /// ZNF395	157574 /// 55893
209685_s_at	0.793672	0.0172371	PRKCB	5579
212345_s_at	0.834807	0.0172396	CREB3L2	64764
208818_s_at	0.847293	0.0172435	COMT	1312
217962_at	0.758836	0.017265	NOP10	55505
225000_at	0.821908	0.0172746	PRKAR2A	5576
218237_s_at	0.841063	0.017301	SLC38A1	81539
240191_at	0.790045	0.0173291	ZNF543	125919
218626_at	0.856685	0.0173486	EIF4ENIF1	56478
209455_at	0.850896	0.0173669	FBXW11	23291
212066_s_at	0.848959	0.0174022	USP34	9736
209254_at	0.723906	0.017405	KLHDC10	23008
242680_at	0.67661	0.0174116
237639_at	0.733734	0.017461	TMEM207	131920
200619_at	0.792414	0.0174624	SF3B2	10992
212710_at	0.830494	0.0174715	CAMSAP1	157922
216248_s_at	0.736017	0.0174966	NR4A2	4929
1555349_a_at	0.73529	0.0175007	ITGB2	3689
AFFX-CreX-3_at	0.708839	0.0175271
1558695_at	1.4993	0.0175346
212251_at	0.769031	0.0175365	MTDH	92140
1569607_s_at	0.644589	0.0175446	ANKRD20A1 /// ANKRD20A2 /// ANKRD20A3 /// ANKRD20A4 /// C21orf81 /// LOC100132733 /// LOC284232	100132733 /// 284232 /// 391267 /// 441425 /// 441430 /// 728747 /// 84210
235442_at	0.573571	0.0175834	CXorf56	63932
225204_at	0.815767	0.0175862	PPTC7	160760
225234_at	0.788263	0.0176137	CBL	867
204290_s_at	0.720409	0.0176438	ALDH6A1	4329
201412_at	0.759403	0.0176725	LRP10	26020
207315_at	0.718381	0.0177051	CD226	10666
1560257_at	1.29932	0.0177151
228420_at	0.868694	0.0177303	PDCD2	5134
225272_at	0.812324	0.0177362	SAT2	112483
200630_x_at	0.870014	0.0177501	SET	6418
225179_at	0.864186	0.0177617	UBE2K	3093
206724_at	1.37444	0.0177656	CBX4	8535
201206_s_at	0.752425	0.0177695	RRBP1	6238
201743_at	0.706459	0.0177852	CD14	929
204192_at	0.822138	0.0177881	CD37	951
210858_x_at	0.765107	0.0178234	ATM	472
207735_at	0.745496	0.0178519	RNF125	54941
240069_at	0.711711	0.0178649
202540_s_at	0.822776	0.0179783	HMGCR	3156
219108_x_at	0.748059	0.0179784	DDX27 /// SS18	55661 /// 6760
205030_at	1.33365	0.0180047	FABP7	2173
226723_at	0.750699	0.0180086	CCDC23	374969
221822_at	0.677338	0.0180204	CCDC101	112869
218316_at	0.827815	0.0180487	TIMM9	26520
227741_at	0.701429	0.0180507	PTPLB	201562
201636_at	0.842108	0.0180757	FXR1	8087
226020_s_at	0.823165	0.0180918	DAB1 /// OMA1	115209 /// 1600
212095_s_at	0.622488	0.018101	MTUS1	57509
203508_at	0.774166	0.0181066	TNFRSF1B	7133
212614_at	0.821119	0.0181075	ARID5B	84159
200025_s_at	0.729935	0.018109	RPL27	6155
201439_at	0.747086	0.0181174	GBF1	8729
1553130_at	0.759458	0.0181453	LOC652276	652276
1557027_at	0.729279	0.0181642	LOC100287221	100287221
219247_s_at	0.705919	0.0181658	ZDHHC14	79683
223023_at	0.766828	0.0181669	BET1L	51272
55662_at	0.773992	0.0181701	C10orf76	79591
217225_x_at	0.773748	0.0181892	NOMO1 /// NOMO2 /// NOMO3	23420 /// 283820 /// 408050
231640_at	0.710205	0.0181975
1560060_s_at	0.822472	0.0182341	VPS37C	55048
231087_at	1.29951	0.0182525
201192_s_at	0.786749	0.0183169	PITPNA	5306
223466_x_at	0.793036	0.0183365	COL4A3BP	10087
207567_at	0.743766	0.0183633	SLC13A2	9058
224732_at	0.78869	0.0183763	CHTF8	54921
226090_x_at	0.80118	0.0183778	RABL3	285282
211686_s_at	0.860273	0.0183873	MAK16	84549
208744_x_at	0.75501	0.0183993	HSPH1	10808
242127_at	0.765103	0.018408
208758_at	0.812931	0.0184089	ATIC	471
209563_x_at	0.860132	0.018462	CALM1	801
1563483_at	1.24351	0.0184714	FAM91A2	57234
1553718_at	0.864506	0.0184747	ZNF548	147694
217398_x_at	0.824746	0.0184857	GAPDH	2597
218982_s_at	0.84164	0.0184938	MRPS17 /// ZNF713	349075 /// 51373
207102_at	0.739012	0.0184943	AKR1D1	6718
215396_at	0.802061	0.018539	GPR98	84059
215860_at	0.792554	0.0185427	SYT12	91683
1564984_at	0.748252	0.0185436
204549_at	0.77803	0.018549	IKBKE	9641
205686_s_at	0.812864	0.0185655	CD86	942
229874_x_at	0.76628	0.0185716
1555973_at	1.25663	0.0185725
214058_at	0.785708	0.0185838	MYCL1	4610
202001_s_at	0.757232	0.0185886	NDUFA6	4700
210687_at	1.33072	0.0186093	CPT1A	1374
203012_x_at	0.851342	0.0186094	RPL23A	6147
AFFX-r2-Ec-bioB-3_at	0.684843	0.0186581
212880_at	0.816497	0.0186635	WDR7	23335
202402_s_at	0.810459	0.0186667	CARS	833
207949_s_at	1.45521	0.0186775	ICA1	3382
207426_s_at	0.730931	0.0186884	TNFSF4	7292
200987_x_at	0.812672	0.0186949	PSME3	10197
202512_s_at	0.812357	0.0186962	ATG5	9474
221479_s_at	0.731011	0.0187125	BNIP3L	665
201622_at	0.766248	0.0187653	SND1	27044
204908_s_at	0.776326	0.0187691	BCL3	602
225435_at	0.749827	0.0187757	SSR1	6745
1560472_at	1.34403	0.0187871	LOC338588	338588
225472_at	0.844426	0.0188404	BAT4	7918
204000_at	0.766093	0.018853	GNB5	10681
203421_at	0.632049	0.0189022	TP53I11	9537
219043_s_at	0.814913	0.0189127	LOC285359 /// PDCL3	285359 /// 79031
210891_s_at	0.853221	0.0189218	GTF2I /// GTF2IP1 /// LOC100093631	100093631 /// 2969 /// 2970
217742_s_at	0.855207	0.0189234	WAC	51322
214691_x_at	1.29624	0.018943	FAM63B	54629
219526_at	0.822393	0.0189624	C14orf169	79697
232826_at	1.35873	0.0189785
226518_at	0.83808	0.0189996	KCTD10	83892
201717_at	0.854533	0.0190099	MRPL49	740
204206_at	0.811684	0.0190268	MNT	4335
221970_s_at	0.859379	0.0190291	NOL11	25926
201812_s_at	0.647083	0.0190473	C4orf46 /// TOMM7	201725 /// 54543
200972_at	0.835816	0.0190593	TSPAN3	10099
45687_at	0.749718	0.0191649	PRR14	78994
202737_s_at	0.830892	0.0191854	LSM4	25804
200023_s_at	0.80368	0.019222	EIF3F	8665
224893_at	0.801881	0.0192471	ATL3	25923
1570007_at	1.29399	0.0192652	LRRC8C	84230
201944_at	0.770745	0.0192976	HEXB	3074
1559353_at	1.3767	0.019321
212321_at	0.809556	0.0193297	SGPL1	8879
57163_at	0.818995	0.0193367	ELOVL1	64834
206059_at	0.729246	0.0193421	ZNF91	7644
217992_s_at	0.779516	0.0193491	EFHD2	79180
200017_at	0.828062	0.0193492	RPS27A	6233
203685_at	0.801174	0.0193508	BCL2	596
205719_s_at	0.666181	0.0193577	PAH	5053
232055_at	1.29765	0.019369	SFXN1	94081
217615_at	1.45549	0.019377
214209_s_at	1.40783	0.0194084	ABCB9	23457
212361_s_at	0.810157	0.0194334	ATP2A2	488
35265_at	0.793175	0.0194404	FXR2	9513
223171_at	0.826445	0.0194572	DYM	54808
243613_at	0.713609	0.0194581	DENND5B	160518
233588_x_at	0.763175	0.0194656	PFDN6	10471
216570_x_at	0.837704	0.0194956	LOC100510735 /// RPL29	100510735 /// 6159
217821_s_at	0.720853	0.0195479	WBP11	51729
224068_x_at	0.812964	0.0195908	RBM22	55696
239135_at	0.79104	0.0196314	CPPED1	55313
207551_s_at	0.840089	0.0196371	MSL3	10943
[truncated: 1,620 more rows]
