# Supplementary material for: Comparison of Blood RNA Extraction Methods Used for Gene Expression Profiling in Amyotrophic Lateral Sclerosis
Source: PLoS One. 2014 Jan 27;9(1):e87508. doi: 10.1371/journal.pone.0087508 (PMC3903649; doi:10.1371/journal.pone.0087508)
Supplement: Table S5 — KEGG pathway analysis of LL affected pathways. (XLSX) [file pone.0087508.s005.xlsx]

## Sheet: S5 KEGG LL
Term	Count	%	PValue	Pop Hits	Fold Enrichment	Bonferroni	Benjamini	FDR
hsa05221:Acute myeloid leukemia	19	0.815101	7.65888e-05	58	2.75791	0.0141451	0.0141451	0.0948132
hsa04120:Ubiquitin mediated proteolysis	33	1.4157	9.76833e-05	137	2.0279	0.0180059	0.00904384	0.120913
hsa04144:Endocytosis	39	1.6731	0.000354322	184	1.78444	0.0637901	0.0217322	0.43794
hsa05200:Pathways in cancer	60	2.574	0.000511707	328	1.54004	0.0908107	0.0235195	0.631902
hsa04666:Fc gamma R-mediated phagocytosis	24	1.0296	0.00053646	95	2.12687	0.0949891	0.0197637	0.662375
hsa05213:Endometrial cancer	16	0.686401	0.00072178	52	2.59042	0.125672	0.0221346	0.890254
hsa04012:ErbB signaling pathway	22	0.943801	0.000965077	87	2.12891	0.164388	0.0253295	1.18869
hsa04722:Neurotrophin signaling pathway	28	1.2012	0.00108741	124	1.90104	0.183206	0.0249788	1.33844
hsa05223:Non-small cell lung cancer	16	0.686401	0.00111172	54	2.49448	0.186895	0.0227261	1.36817
hsa04620:Toll-like receptor signaling pathway	24	1.0296	0.00132729	101	2.00052	0.218891	0.0244014	1.63148
hsa05214:Glioma	17	0.729301	0.00216491	63	2.27176	0.331761	0.035983	2.64843
hsa04010:MAPK signaling pathway	48	2.0592	0.00296134	267	1.51351	0.423988	0.0449283	3.6064
hsa04660:T cell receptor signaling pathway	24	1.0296	0.00335723	108	1.87086	0.465004	0.0469759	4.07936
hsa05212:Pancreatic cancer	18	0.772201	0.00367138	72	2.10472	0.495472	0.0476919	4.45314
hsa05210:Colorectal cancer	20	0.858001	0.00367705	84	2.00449	0.496007	0.0446519	4.45988
hsa04664:Fc epsilon RI signaling pathway	19	0.815101	0.00369374	78	2.05075	0.497575	0.042107	4.4797
hsa04210:Apoptosis	20	0.858001	0.00552973	87	1.93537	0.643487	0.058866	6.63702
hsa05215:Prostate cancer	20	0.858001	0.00714553	89	1.89188	0.736536	0.0714232	8.49846
hsa04630:Jak-STAT signaling pathway	30	1.287	0.00774105	155	1.62946	0.764357	0.0732539	9.17587
hsa04114:Oocyte meiosis	23	0.986701	0.00885244	110	1.76031	0.808695	0.0793674	10.4278
hsa04914:Progesterone-mediated oocyte maturation	19	0.815101	0.0107181	86	1.85998	0.865249	0.0910307	12.4937
hsa04510:Focal adhesion	36	1.5444	0.0114693	201	1.50786	0.883005	0.0929232	13.3131
hsa04070:Phosphatidylinositol signaling system	17	0.729301	0.0115081	74	1.93407	0.883856	0.089358	13.3552
hsa04650:Natural killer cell mediated cytotoxicity	26	1.1154	0.0121578	133	1.64579	0.897225	0.0904455	14.0579
hsa05220:Chronic myeloid leukemia	17	0.729301	0.013077	75	1.90828	0.913566	0.0932921	15.0431
hsa04520:Adherens junction	17	0.729301	0.0167127	77	1.85871	0.956493	0.113585	18.8389
hsa05416:Viral myocarditis	16	0.686401	0.017422	71	1.89721	0.961958	0.114034	19.5611
hsa04810:Regulation of actin cytoskeleton	37	1.5873	0.0187757	215	1.44883	0.970562	0.118306	20.9228
hsa04912:GnRH signaling pathway	20	0.858001	0.0197389	98	1.71814	0.975477	0.12003	21.8788
hsa05330:Allograft rejection	10	0.429	0.0215714	36	2.33858	0.982685	0.126464	23.6684
hsa04115:p53 signaling pathway	15	0.643501	0.0261666	68	1.8571	0.992787	0.147081	27.9915
hsa04370:VEGF signaling pathway	16	0.686401	0.0278289	75	1.79603	0.99475	0.151299	29.4991
hsa04662:B cell receptor signaling pathway	16	0.686401	0.0278289	75	1.79603	0.99475	0.151299	29.4991
hsa05211:Renal cell carcinoma	15	0.643501	0.0328993	70	1.80404	0.998015	0.171842	33.9203
hsa05332:Graft-versus-host disease	10	0.429	0.035244	39	2.15869	0.998736	0.178222	35.8772
hsa04110:Cell cycle	23	0.986701	0.0357808	125	1.54907	0.998861	0.176041	36.3178
hsa03040:Spliceosome	23	0.986701	0.0387171	126	1.53678	0.999354	0.184549	38.6784
hsa03430:Mismatch repair	7	0.3003	0.0468494	23	2.56227	0.999867	0.214322	44.8028
hsa04940:Type I diabetes mellitus	10	0.429	0.0539298	42	2.00449	0.999967	0.237655	49.6716
hsa04612:Antigen processing and presentation	16	0.686401	0.0613299	83	1.62292	0.999992	0.260551	54.3358
hsa05130:Pathogenic Escherichia coli infection	12	0.514801	0.0682617	57	1.77239	0.999998	0.280192	58.341
hsa05218:Melanoma	14	0.600601	0.0716019	71	1.66006	0.999999	0.286123	60.1534
hsa04910:Insulin signaling pathway	23	0.986701	0.0735566	135	1.43433	0.999999	0.287057	61.18
hsa04150:mTOR signaling pathway	11	0.4719	0.0814032	52	1.78092	1	0.307382	65.0614
hsa00600:Sphingolipid metabolism	9	0.3861	0.0830957	39	1.94282	1	0.307	65.8504
