# Supplementary material for: Comparison of Blood RNA Extraction Methods Used for Gene Expression Profiling in Amyotrophic Lateral Sclerosis
Source: PLoS One. 2014 Jan 27;9(1):e87508. doi: 10.1371/journal.pone.0087508 (PMC3903649; doi:10.1371/journal.pone.0087508)
Supplement: Table S6 — KEGG pathway analysis of TEM GC affected pathways. (XLSX) [file pone.0087508.s006.xlsx]

## Sheet: S6 KEGG TEM GC
Term	Count	%	PValue	Pop Hits	Fold Enrichment	Bonferroni	Benjamini	FDR
hsa03010:Ribosome	67	2.32397	2.75076e-34	87	4.54824	5.33647e-32	5.33647e-32	3.43059e-31
hsa03040:Spliceosome	50	1.7343	2.18139e-09	126	2.34362	4.23189e-07	2.11595e-07	2.7205e-06
hsa04142:Lysosome	37	1.28339	0.000134369	117	1.86769	0.0257324	0.0086521	0.167448
hsa00190:Oxidative phosphorylation	39	1.35276	0.000287946	130	1.77178	0.0543375	0.0138703	0.358517
hsa05010:Alzheimer's disease	45	1.56087	0.000679149	163	1.63047	0.123483	0.0260155	0.843704
hsa05012:Parkinson's disease	37	1.28339	0.000914927	128	1.70718	0.162704	0.0291625	1.13508
hsa05220:Chronic myeloid leukemia	25	0.867152	0.000929392	75	1.96864	0.165052	0.0254402	1.15293
hsa04666:Fc gamma R-mediated phagocytosis	29	1.0059	0.00153194	95	1.80286	0.257271	0.0364954	1.89385
hsa05223:Non-small cell lung cancer	18	0.62435	0.00600747	54	1.96864	0.689311	0.121803	7.23935
hsa04910:Insulin signaling pathway	35	1.21401	0.00864568	135	1.53117	0.814473	0.155031	10.2635
hsa05016:Huntington's disease	44	1.52619	0.00926127	180	1.44367	0.835535	0.15134	10.956
hsa04722:Neurotrophin signaling pathway	32	1.10995	0.0131758	124	1.52411	0.9237	0.192994	15.2456
hsa04612:Antigen processing and presentation	23	0.79778	0.0175363	83	1.63658	0.967685	0.23204	19.7997
hsa03050:Proteasome	15	0.520291	0.0199793	47	1.88487	0.980064	0.243959	22.2517
hsa05110:Vibrio cholerae infection	17	0.589664	0.0199918	56	1.79287	0.980113	0.229857	22.264
hsa05215:Prostate cancer	24	0.832466	0.0206964	89	1.59261	0.982703	0.22398	22.9582
hsa04662:B cell receptor signaling pathway	21	0.728408	0.0214528	75	1.65366	0.985111	0.219233	23.697
hsa03018:RNA degradation	17	0.589664	0.023577	57	1.76142	0.990233	0.226749	25.7372
hsa04144:Endocytosis	42	1.45682	0.0332845	184	1.34809	0.998594	0.292231	34.4378
hsa00970:Aminoacyl-tRNA biosynthesis	13	0.450919	0.0342942	41	1.87261	0.998852	0.287155	35.2867
hsa05222:Small cell lung cancer	22	0.763094	0.0370243	84	1.54679	0.999337	0.294273	37.5317
hsa05216:Thyroid cancer	10	0.346861	0.0443744	29	2.03653	0.99985	0.329847	43.2246
hsa04210:Apoptosis	22	0.763094	0.0521335	87	1.49345	0.999969	0.363399	48.7134
hsa00310:Lysine degradation	13	0.450919	0.0566503	44	1.74493	0.999988	0.375876	51.6794
hsa04062:Chemokine signaling pathway	41	1.42213	0.061847	187	1.29488	0.999996	0.390683	54.8962
hsa04540:Gap junction	22	0.763094	0.0643756	89	1.45989	0.999998	0.391342	56.3891
hsa05200:Pathways in cancer	67	2.32397	0.0655871	328	1.20639	0.999998	0.385791	57.0882
hsa04510:Focal adhesion	43	1.4915	0.0774012	201	1.26346	1	0.427745	63.3849
hsa05416:Viral myocarditis	18	0.62435	0.080216	71	1.49728	1	0.428428	64.7539
hsa04940:Type I diabetes mellitus	12	0.416233	0.0850855	42	1.68741	1	0.437321	67.0117
hsa05213:Endometrial cancer	14	0.485605	0.08845	52	1.59006	1	0.439851	68.4931
hsa05212:Pancreatic cancer	18	0.62435	0.0892579	72	1.47648	1	0.432671	68.8396
hsa05014:Amyotrophic lateral sclerosis (ALS)	14	0.485605	0.0999549	53	1.56006	1	0.46157	73.1088
